# Supplementary material for: Wounding-Related Signaling Is Integrated within the Auxin-Response Framework to Induce Adventitious Rooting in Chestnut
Source: Preprints.org preprint supplement (doi:10.20944/preprints202403.0315.v1), 2024-03-06
Supplement: Supplementary file 1 [file supplementary]

## Sheet: Table S1
Table S1.- Primers used for qRT-PCR expression analysis
Gene	Forward Primer 5´→3´	Reverse Primer 3´→5´	Product size (bp)
CsERF-113	TCAGAGCTCTCAGATGGGGG	TTTGCTATTCCCCAGGTCCAG	161
CsLBD-16	ATCCCATTTCCCCTCAGAGC	GTGTTTCAAGCTCACCCCAG	153
CsIAA6	GCGACTGGATGCTAATGGGAG	TGCAGTCCAAAACCCTTGGC	103
Cs22D	AGATGGCGATTGGATGCTGG	CTGGCCAATCAATTTCCCTTCC	175
CsACT-2	GCCCCACGAGCTGTGTTC	TCTGGCCCATTCCAACCA	201
CsELF1	TGTGCCGTCCTCATTATTGACT	TCACGGGTCTGACCATCCTT	189

## Sheet: Table S2
Table S2.- Transcriptomic data from the samples used in this study. Each sample comprises three biological replicates.
Sample	Gigabases generated	Number of reads	Mean read length (bp)	Mean percentage of mapping to the reference genome	Mean Quality (Q)
P2BS CTRL (T.0)	2.1	3418512	512	76.3	9.3
P2BS Wounding 24h	2.5	4134947	623	91.1	9.1
P2BS Wounding 48h	2.4	4098873	601	84.3	9.2
P2BS Wounding 72h	1.9	2835650	600	89.1	9.2
P2BS Wounding+IBA 24h	2.5	4008395	648	78.3	9.4
P2BS Wounding+IBA 48h	2.6	4350915	620	75.4	9.1
P2BS Wounding+IBA 72h	2.2	4590144	580	77.8	8.7

## Sheet: Table S3
Table S3.- List of Differentially Expressed Genes identified in the Wounding samples. The corresponding Gene Symbol for the Quercus suber gene is given.
Gene ID	Gene Symbol	Gene name	Gene Type
112013628	LOC112013628	proline-rich extensin-like protein EPR1	protein-coding
112039616	LOC112039616	early nodulin-75-like	protein-coding
112013622	LOC112013622	early nodulin-75-like	pseudo
112021059	LOC112021059	proline-rich extensin-like protein EPR1	protein-coding
111986359	LOC111986359	early nodulin-75-like	pseudo
112021062	LOC112021062	early nodulin-75-like	protein-coding
112013627	LOC112013627	proline-rich 33 kDa extensin-related protein-like	protein-coding
112013623	LOC112013623	early nodulin-75-like	protein-coding
112016635	LOC112016635	early nodulin-75-like	protein-coding
112013635	LOC112013635	repetitive proline-rich cell wall protein 2-like	protein-coding
111997526	LOC111997526	endo-1,3;1,4-beta-D-glucanase-like	protein-coding
111991524	LOC111991524	repetitive proline-rich cell wall protein 2-like	protein-coding
111993633	LOC111993633	early nodulin-75-like	protein-coding
112034153	LOC112034153	cationic peroxidase 1-like	pseudo
112033748	LOC112033748	formate dehydrogenase, mitochondrial	protein-coding
112009987	LOC112009987	early nodulin-75-like	protein-coding
111993694	LOC111993694	early nodulin-75-like	protein-coding
112034273	LOC112034273	histidine-rich glycoprotein-like	protein-coding
112034238	LOC112034238	glycine-rich protein DC7.1-like	protein-coding
112004565	LOC112004565	acidic endochitinase-like	protein-coding
112028558	LOC112028558	peroxidase P7-like	protein-coding
112006270	LOC112006270	endo-1,3;1,4-beta-D-glucanase-like	protein-coding
112039625	LOC112039625	dirigent protein 22-like	protein-coding
112028236	LOC112028236	epoxide hydrolase A-like	protein-coding
112000275	LOC112000275	acidic endochitinase-like	protein-coding
112014044	LOC112014044	acidic endochitinase-like	protein-coding
112034269	LOC112034269	dormancy-associated protein 2-like	protein-coding
111999906	LOC111999906	bifunctional L-3-cyanoalanine synthase/cysteine synthase 1, mitochondrial	protein-coding
112032867	LOC112032867	heavy metal-associated isoprenylated plant protein 39-like	protein-coding
112035443	LOC112035443	NAC domain-containing protein 2-like	protein-coding
111997018	LOC111997018	glycine-rich protein DC7.1-like	protein-coding
111999225	LOC111999225	plastid division protein PDV2-like	protein-coding
112028547	LOC112028547	major allergen Pru ar 1-like	protein-coding
112034155	LOC112034155	cationic peroxidase 1-like	protein-coding
112019251	LOC112019251	cationic peroxidase 1-like	protein-coding
111984856	LOC111984856	ethylene-responsive transcription factor RAP2-3-like	protein-coding
112010559	LOC112010559	extensin-2-like	protein-coding
112039050	LOC112039050	36.4 kDa proline-rich protein	protein-coding
112001060	LOC112001060	uncharacterized LOC112001060	protein-coding
112010041	LOC112010041	1-aminocyclopropane-1-carboxylate oxidase homolog 6-like	pseudo
112031754	LOC112031754	S-adenosylmethionine decarboxylase proenzyme-like	protein-coding
112034228	LOC112034228	glycine-rich protein DC7.1-like	protein-coding
112004732	LOC112004732	AT-hook motif nuclear-localized protein 17-like	protein-coding
112002298	LOC112002298	1-aminocyclopropane-1-carboxylate oxidase homolog 6-like	protein-coding
112006832	LOC112006832	acidic endochitinase-like	protein-coding
112001059	LOC112001059	uncharacterized LOC112001059	protein-coding
112032818	LOC112032818	glutathione S-transferase U8-like	pseudo
111986377	LOC111986377	uncharacterized LOC111986377	protein-coding
112000332	LOC112000332	uncharacterized LOC112000332	protein-coding
112035692	LOC112035692	NAC domain-containing protein 2-like	protein-coding
112021099	LOC112021099	probable glutathione S-transferase	protein-coding
112002281	LOC112002281	1-aminocyclopropane-1-carboxylate oxidase homolog 1-like	protein-coding
112027987	LOC112027987	early nodulin-93-like	protein-coding
111986390	LOC111986390	uncharacterized LOC111986390	protein-coding
111984019	LOC111984019	proline-rich extensin-like protein EPR1	protein-coding
112029612	LOC112029612	monooxygenase 2-like	pseudo
112020432	LOC112020432	probable glutathione S-transferase	protein-coding
112030122	LOC112030122	non-functional NADPH-dependent codeinone reductase 2-like	pseudo
112020158	LOC112020158	pathogenesis-related genes transcriptional activator PTI5-like	protein-coding
112020180	LOC112020180	ethylene-responsive transcription factor RAP2-3-like	protein-coding
112014108	LOC112014108	ethylene-responsive transcription factor ERF113-like	protein-coding
112016364	LOC112016364	crocetin glucosyltransferase, chloroplastic-like	protein-coding
112006022	LOC112006022	ethylene-responsive transcription factor RAP2-3-like	protein-coding
112021201	LOC112021201	protein ATAF2-like	protein-coding
111986706	LOC111986706	36.4 kDa proline-rich protein	protein-coding
111988217	LOC111988217	abscisic acid receptor PYL4-like	protein-coding
112001058	LOC112001058	uncharacterized LOC112001058	protein-coding
112028497	LOC112028497	major allergen Pru ar 1-like	protein-coding
111997959	LOC111997959	scopoletin glucosyltransferase-like	protein-coding
112020834	LOC112020834	L-ascorbate peroxidase, cytosolic-like	protein-coding
111994220	LOC111994220	fructose-bisphosphate aldolase 6, cytosolic	protein-coding
112031840	LOC112031840	oxalate--CoA ligase-like	protein-coding
111992134	LOC111992134	abscisate beta-glucosyltransferase-like	protein-coding
112019884	LOC112019884	crocetin glucosyltransferase, chloroplastic-like	protein-coding
111985052	LOC111985052	ethylene-responsive transcription factor ERF113-like	protein-coding
112024966	LOC112024966	ferredoxin--nitrite reductase, chloroplastic	protein-coding
111986376	LOC111986376	uncharacterized LOC111986376	protein-coding
112039114	LOC112039114	ABC transporter C family member 14-like	protein-coding
112016655	LOC112016655	major allergen Pru av 1-like	protein-coding
112035116	LOC112035116	cysteine-rich repeat secretory protein 38-like	protein-coding
111997180	LOC111997180	alcohol dehydrogenase 1	protein-coding
111991668	LOC111991668	abscisate beta-glucosyltransferase-like	protein-coding
112004964	LOC112004964	oxalate--CoA ligase-like	protein-coding
112028433	LOC112028433	uncharacterized LOC112028433	ncRNA
112021638	LOC112021638	probable glutathione S-transferase parC	protein-coding
112016658	LOC112016658	5.8S ribosomal RNA	rRNA
112028576	LOC112028576	major allergen Pru ar 1-like	protein-coding
112010945	LOC112010945	probable glutathione S-transferase	protein-coding
112004135	LOC112004135	uncharacterized LOC112004135	protein-coding
112035115	LOC112035115	cysteine-rich repeat secretory protein 38-like	pseudo
112001486	LOC112001486	gibberellin receptor GID1B-like	protein-coding
112004043	LOC112004043	cytochrome P450 CYP73A100-like	protein-coding
112018937	LOC112018937	major allergen Pru av 1-like	protein-coding
112010940	LOC112010940	probable glutathione S-transferase parC	protein-coding
112015494	LOC112015494	delta(12)-fatty-acid desaturase FAD2	protein-coding
112027554	LOC112027554	non-functional NADPH-dependent codeinone reductase 2-like	protein-coding
111989566	LOC111989566	uncharacterized LOC111989566	protein-coding
112007353	LOC112007353	beta-amyrin 28-oxidase-like	protein-coding
112033117	LOC112033117	uncharacterized LOC112033117	protein-coding
112033118	LOC112033118	uncharacterized LOC112033118	protein-coding
111992824	LOC111992824	uncharacterized LOC111992824	protein-coding
111994370	LOC111994370	uncharacterized LOC111994370	protein-coding
112008673	LOC112008673	uncharacterized LOC112008673	protein-coding
112028209	LOC112028209	transcription factor MYB4-like	protein-coding
112021098	LOC112021098	extensin-like	protein-coding
111994344	LOC111994344	cytochrome P450 CYP736A12-like	pseudo
111989701	LOC111989701	expansin-like B1	protein-coding
112010520	LOC112010520	putative UDP-rhamnose:rhamnosyltransferase 1	protein-coding
112030441	LOC112030441	MLP-like protein 43	protein-coding
112016612	LOC112016612	5.8S ribosomal RNA	rRNA
111985890	LOC111985890	cytochrome P450 CYP736A12-like	pseudo
111999488	LOC111999488	probable glutathione S-transferase	protein-coding
112008495	LOC112008495	uclacyanin-3	protein-coding
111996615	LOC111996615	arginine decarboxylase-like	protein-coding
111992289	LOC111992289	acetyl-CoA acetyltransferase, cytosolic 1	protein-coding
112003043	LOC112003043	NDR1/HIN1-like protein 10	protein-coding
111997463	LOC111997463	uncharacterized LOC111997463	protein-coding
112030338	LOC112030338	cysteine proteinase inhibitor 5-like	protein-coding
111991541	LOC111991541	glutathione S-transferase U25-like	pseudo
111994139	LOC111994139	protein P21-like	protein-coding
111986809	LOC111986809	feruloyl CoA ortho-hydroxylase 1-like	protein-coding
111994232	LOC111994232	kirola-like	protein-coding
111985947	LOC111985947	cationic peroxidase 1-like	protein-coding
112003971	LOC112003971	caffeic acid 3-O-methyltransferase-like	protein-coding
111988128	LOC111988128	14 kDa proline-rich protein DC2.15-like	protein-coding
112030339	LOC112030339	cysteine proteinase inhibitor 5-like	protein-coding
112007287	LOC112007287	acetate/butyrate--CoA ligase AAE7, peroxisomal	protein-coding
112002857	LOC112002857	pathogenesis-related protein PR-4-like	protein-coding
112029672	LOC112029672	thaumatin-like protein 1	protein-coding
112016750	LOC112016750	5.8S ribosomal RNA	rRNA
112016527	LOC112016527	3-oxo-Delta(4,5)-steroid 5-beta-reductase-like	pseudo
111997529	LOC111997529	protein P21-like	protein-coding
112011319	LOC112011319	uncharacterized LOC112011319	protein-coding
112014153	LOC112014153	uncharacterized LOC112014153	protein-coding
112035335	LOC112035335	cysteine-rich repeat secretory protein 38-like	pseudo
112004276	LOC112004276	UDP-glycosyltransferase 76F1-like	protein-coding
112035110	LOC112035110	cysteine-rich repeat secretory protein 38-like	protein-coding
112017318	LOC112017318	expansin-A4-like	protein-coding
112002968	LOC112002968	uncharacterized protein At4g22758	protein-coding
111985891	LOC111985891	cytochrome P450 CYP736A12-like	pseudo
112007252	LOC112007252	cytochrome P450 714C2-like	protein-coding
111999486	LOC111999486	probable glutathione S-transferase	protein-coding
112035773	LOC112035773	putative ripening-related protein 1	protein-coding
111993884	LOC111993884	ethylene receptor 2-like	protein-coding
112039560	LOC112039560	endochitinase-like	protein-coding
111996133	LOC111996133	cytochrome P450 CYP73A100-like	protein-coding
112022319	LOC112022319	uncharacterized LOC112022319	protein-coding
112025054	LOC112025054	alcohol dehydrogenase 1-like	protein-coding
111989517	LOC111989517	stearoyl-acyl-carrier-protein 9-desaturase 6, chloroplastic	protein-coding
112030430	LOC112030430	non-functional NADPH-dependent codeinone reductase 2-like	protein-coding
111985470	LOC111985470	glyceraldehyde-3-phosphate dehydrogenase, cytosolic	protein-coding
111996905	LOC111996905	profilin-4	protein-coding
112016815	LOC112016815	5.8S ribosomal RNA	rRNA
112034086	LOC112034086	uncharacterized LOC112034086	ncRNA
111988058	LOC111988058	uncharacterized LOC111988058	ncRNA
112016533	LOC112016533	3-oxo-Delta(4,5)-steroid 5-beta-reductase-like	protein-coding
112006346	LOC112006346	probable aldo-keto reductase 2	protein-coding
111997072	LOC111997072	cationic peroxidase 2-like	protein-coding
112018936	LOC112018936	major allergen Pru av 1-like	protein-coding
112038358	LOC112038358	cationic peroxidase 1-like	protein-coding
112005979	LOC112005979	major allergen Pru ar 1-like	protein-coding
111991037	LOC111991037	2-alkenal reductase (NADP(+)-dependent)-like	protein-coding
111985237	LOC111985237	squalene monooxygenase-like	protein-coding
112028052	LOC112028052	cytochrome P450 CYP736A12-like	protein-coding
112037373	LOC112037373	pathogenesis-related protein PR-4-like	protein-coding
112033147	LOC112033147	probable WRKY transcription factor 31	protein-coding
112033411	LOC112033411	21 kDa protein-like	protein-coding
112004795	LOC112004795	uncharacterized LOC112004795	protein-coding
112023030	LOC112023030	two-component response regulator-like APRR1	protein-coding
112034957	LOC112034957	polyphenol oxidase, chloroplastic-like	protein-coding
112034347	LOC112034347	cytochrome P450 81E8-like	protein-coding
112024903	LOC112024903	pyruvate kinase 1, cytosolic	protein-coding
111984080	LOC111984080	UDP-glycosyltransferase 76F1-like	protein-coding
112004213	LOC112004213	cucumber peeling cupredoxin-like	protein-coding
112004789	LOC112004789	potassium transporter 5-like	protein-coding
111996712	LOC111996712	pleiotropic drug resistance protein 2-like	protein-coding
112009723	LOC112009723	purple acid phosphatase-like	protein-coding
112027634	LOC112027634	cationic peroxidase 2-like	protein-coding
112018096	LOC112018096	cationic peroxidase 2-like	protein-coding
111991081	LOC111991081	uncharacterized LOC111991081	ncRNA
111998872	LOC111998872	heat shock factor protein HSF24	protein-coding
111984081	LOC111984081	UDP-glycosyltransferase 76F1-like	protein-coding
112008710	LOC112008710	endochitinase A2-like	protein-coding
111994345	LOC111994345	cytochrome P450 CYP736A12-like	protein-coding
112021160	LOC112021160	7-deoxyloganetin glucosyltransferase-like	protein-coding
112007546	LOC112007546	putative disease resistance protein RGA3	protein-coding
112040974	LOC112040974	ethylene-responsive transcription factor 4-like	protein-coding
112028172	LOC112028172	acanthoscurrin-1-like	protein-coding
112004820	LOC112004820	uncharacterized LOC112004820	protein-coding
112037375	LOC112037375	pro-hevein-like	protein-coding
111998054	LOC111998054	probable aldo-keto reductase 2	protein-coding
112008709	LOC112008709	endochitinase-like	protein-coding
111995154	LOC111995154	uncharacterized LOC111995154	protein-coding
112033476	LOC112033476	2-hydroxyisoflavanone dehydratase-like	protein-coding
112008972	LOC112008972	alcohol dehydrogenase-like	protein-coding
112007577	LOC112007577	probable sarcosine oxidase	protein-coding
112028462	LOC112028462	major allergen Pru ar 1-like	protein-coding
112027252	LOC112027252	plasma membrane ATPase 4-like	protein-coding
112003066	LOC112003066	3-hydroxy-3-methylglutaryl-coenzyme A reductase 1-like	protein-coding
112002344	LOC112002344	protein DETOXIFICATION 16-like	protein-coding
111995985	LOC111995985	glutathione S-transferase U8-like	protein-coding
112040233	LOC112040233	glucan endo-1,3-beta-glucosidase, basic isoform-like	protein-coding
112026171	LOC112026171	glutamate decarboxylase-like	protein-coding
112004139	LOC112004139	uncharacterized LOC112004139	protein-coding
111988050	LOC111988050	non-functional NADPH-dependent codeinone reductase 2-like	pseudo
112023892	LOC112023892	cationic peroxidase 1-like	protein-coding
112015742	LOC112015742	cysteine-rich repeat secretory protein 38-like	protein-coding
112028782	LOC112028782	epoxide hydrolase A-like	protein-coding
112033819	LOC112033819	probable aldo-keto reductase 2	protein-coding
112028639	LOC112028639	putative ripening-related protein 1	protein-coding
112005290	LOC112005290	glutathione S-transferase L3-like	protein-coding
111991910	LOC111991910	cysteine-rich repeat secretory protein 38-like	protein-coding
112007585	LOC112007585	probable sarcosine oxidase	protein-coding
111997181	LOC111997181	alcohol dehydrogenase 1-like	pseudo
112013874	LOC112013874	probable glutathione S-transferase	protein-coding
112032157	LOC112032157	transcription factor PCL1-like	protein-coding
112003150	LOC112003150	mitogen-activated protein kinase kinase 9-like	protein-coding
112036130	LOC112036130	polyubiquitin-like	protein-coding
112015695	LOC112015695	21 kDa protein-like	protein-coding
112030015	LOC112030015	bifunctional 3-dehydroquinate dehydratase/shikimate dehydrogenase, chloroplastic-like	protein-coding
112040683	LOC112040683	glutathione transferase GST 23-like	protein-coding
111995994	LOC111995994	glutathione S-transferase U8-like	protein-coding
111988060	LOC111988060	uncharacterized LOC111988060	ncRNA
112037103	LOC112037103	beta-glucosidase 44-like	protein-coding
111985483	LOC111985483	uncharacterized LOC111985483	protein-coding
111997295	LOC111997295	uncharacterized LOC111997295	ncRNA
111998637	LOC111998637	cysteine-rich and transmembrane domain-containing protein WIH2-like	protein-coding
111986286	LOC111986286	glucan endo-1,3-beta-glucosidase, basic vacuolar isoform-like	protein-coding
112008493	LOC112008493	transcription factor JUNGBRUNNEN 1-like	protein-coding
112039377	LOC112039377	UDP-glycosyltransferase 74E1-like	pseudo
112022598	LOC112022598	polygalacturonase-1 non-catalytic subunit beta-like	protein-coding
112025926	LOC112025926	2-alkenal reductase (NADP(+)-dependent)-like	protein-coding
112034346	LOC112034346	cytochrome P450 81E8-like	protein-coding
112016823	LOC112016823	major allergen Pru ar 1-like	protein-coding
112022510	LOC112022510	60S acidic ribosomal protein P1	protein-coding
111986948	LOC111986948	coatomer subunit beta'-1-like	protein-coding
112012545	LOC112012545	UDP-glycosyltransferase 43-like	pseudo
111997183	LOC111997183	alcohol dehydrogenase 1-like	protein-coding
112027601	LOC112027601	glycine-rich RNA-binding protein 2, mitochondrial-like	protein-coding
111998621	LOC111998621	cysteine-rich and transmembrane domain-containing protein WIH2-like	protein-coding
112001053	LOC112001053	uncharacterized LOC112001053	protein-coding
111989427	LOC111989427	polyubiquitin	protein-coding
112023868	LOC112023868	endoglucanase 19-like	protein-coding
112033554	LOC112033554	glutathione S-transferase-like	protein-coding
111988235	LOC111988235	protein NRT1/ PTR FAMILY 5.10-like	protein-coding
111994365	LOC111994365	endochitinase 2-like	protein-coding
111987039	LOC111987039	cysteine-rich repeat secretory protein 55-like	protein-coding
111992037	LOC111992037	polyol transporter 5-like	pseudo
111994405	LOC111994405	protein LIGHT-DEPENDENT SHORT HYPOCOTYLS 5-like	protein-coding
112028146	LOC112028146	peroxidase 10-like	protein-coding
112008943	LOC112008943	pentatricopeptide repeat-containing protein At4g32450, mitochondrial-like	pseudo
112020599	LOC112020599	crocetin glucosyltransferase, chloroplastic-like	protein-coding
111987787	LOC111987787	protein NRT1/ PTR FAMILY 3.1-like	protein-coding
111997675	LOC111997675	40S ribosomal protein S13-like	protein-coding
112002292	LOC112002292	7-deoxyloganetin glucosyltransferase-like	pseudo
112039226	LOC112039226	universal stress protein PHOS34-like	pseudo
111986352	LOC111986352	heat shock 70 kDa protein, mitochondrial	protein-coding
111991523	LOC111991523	coatomer subunit beta'-1-like	protein-coding
112005997	LOC112005997	60S ribosomal protein L19-1	protein-coding
111997522	LOC111997522	endo-1,3;1,4-beta-D-glucanase-like	protein-coding
112022513	LOC112022513	two-component response regulator-like APRR5	protein-coding
111993261	LOC111993261	UDP-glycosyltransferase 43-like	pseudo
111983162	LOC111983162	uncharacterized LOC111983162	protein-coding
112010058	LOC112010058	uncharacterized LOC112010058	protein-coding
111997278	LOC111997278	cysteine-rich repeat secretory protein 38-like	protein-coding
112041062	LOC112041062	glycine-rich protein 5-like	protein-coding
112019340	LOC112019340	40S ribosomal protein S18	protein-coding
112017657	LOC112017657	pectin acetylesterase 10-like	protein-coding
112031573	LOC112031573	alcohol dehydrogenase-like	protein-coding
112026301	LOC112026301	protein LIGHT-DEPENDENT SHORT HYPOCOTYLS 5-like	protein-coding
111998055	LOC111998055	probable aldo-keto reductase 2	protein-coding
112039339	LOC112039339	cysteine-rich repeat secretory protein 38-like	protein-coding
112016146	LOC112016146	dirigent protein 19-like	protein-coding
112025535	LOC112025535	pectinesterase 2-like	protein-coding
112031590	LOC112031590	glutathione S-transferase U10-like	protein-coding
112038927	LOC112038927	cysteine-rich repeat secretory protein 38-like	protein-coding
112019746	LOC112019746	CASP-like protein 1F1	protein-coding
112039561	LOC112039561	endochitinase 2-like	protein-coding
111986324	LOC111986324	glucan endo-1,3-beta-glucosidase, basic vacuolar isoform-like	pseudo
112024098	LOC112024098	NADPH-dependent aldo-keto reductase, chloroplastic-like	protein-coding
112003986	LOC112003986	stigma-specific STIG1-like protein 3	protein-coding
111998523	LOC111998523	probable WRKY transcription factor 28	protein-coding
111997553	LOC111997553	endochitinase-like	protein-coding
112039381	LOC112039381	UDP-glycosyltransferase 74E1-like	protein-coding
112033617	LOC112033617	ubiquitin-40S ribosomal protein S27a	protein-coding
112001052	LOC112001052	uncharacterized LOC112001052	protein-coding
112004744	LOC112004744	uncharacterized LOC112004744	protein-coding
112034981	LOC112034981	stellacyanin-like	protein-coding
112005287	LOC112005287	glutathione S-transferase L3-like	protein-coding
112016526	LOC112016526	3-oxo-Delta(4,5)-steroid 5-beta-reductase-like	protein-coding
112031725	LOC112031725	cytochrome b5	protein-coding
112004844	LOC112004844	40S ribosomal protein SA-like	protein-coding
112031617	LOC112031617	glutathione S-transferase U10-like	protein-coding
112024706	LOC112024706	leucoanthocyanidin reductase-like	protein-coding
111997057	LOC111997057	glutathione transferase GST 23-like	protein-coding
111992008	LOC111992008	auxin-induced in root cultures protein 12-like	protein-coding
112019023	LOC112019023	protein PLANT CADMIUM RESISTANCE 8	protein-coding
111989348	LOC111989348	uncharacterized LOC111989348	ncRNA
112039823	LOC112039823	cucumber peeling cupredoxin	protein-coding
112035569	LOC112035569	ethylene-responsive transcription factor ERF113-like	protein-coding
112030016	LOC112030016	bifunctional 3-dehydroquinate dehydratase/shikimate dehydrogenase, chloroplastic-like	protein-coding
111992187	LOC111992187	abscisate beta-glucosyltransferase-like	protein-coding
112022552	LOC112022552	nitronate monooxygenase	protein-coding
112010973	LOC112010973	glutathione S-transferase U10-like	protein-coding
112037446	LOC112037446	uncharacterized LOC112037446	protein-coding
112032878	LOC112032878	uncharacterized LOC112032878	ncRNA
112034444	LOC112034444	stigma-specific STIG1-like protein 3	protein-coding
112039529	LOC112039529	40S ribosomal protein S16	protein-coding
112035426	LOC112035426	60S ribosomal protein L27a-3-like	protein-coding
112025392	LOC112025392	geraniol 8-hydroxylase-like	protein-coding
111989000	LOC111989000	glycine-rich cell wall structural protein-like	protein-coding
112026246	LOC112026246	lysM domain-containing GPI-anchored protein 2	protein-coding
111993321	LOC111993321	phosphoethanolamine N-methyltransferase 1-like	protein-coding
112032260	LOC112032260	uncharacterized LOC112032260	protein-coding
112038209	LOC112038209	uncharacterized LOC112038209	protein-coding
112034156	LOC112034156	cationic peroxidase 1-like	pseudo
112005578	LOC112005578	putative methyltransferase DDB_G0268948	protein-coding
112013918	LOC112013918	60S ribosomal protein L3-1	protein-coding
112001702	LOC112001702	uncharacterized LOC112001702	ncRNA
112017245	LOC112017245	cytochrome P450 81E8-like	protein-coding
112031150	LOC112031150	2-hydroxyisoflavanone dehydratase-like	protein-coding
112013055	LOC112013055	late embryogenesis abundant protein At1g64065-like	protein-coding
112002335	LOC112002335	protein DETOXIFICATION 16-like	protein-coding
111999144	LOC111999144	ubiquitin-40S ribosomal protein S27a	protein-coding
112009241	LOC112009241	salutaridine reductase-like	protein-coding
112004115	LOC112004115	uncharacterized LOC112004115	protein-coding
111996119	LOC111996119	tropinone reductase homolog At5g06060-like	protein-coding
111987750	LOC111987750	mitochondrial import inner membrane translocase subunit TIM8	protein-coding
112024930	LOC112024930	transcription initiation factor TFIID subunit 7-like	protein-coding
112022587	LOC112022587	polygalacturonase-1 non-catalytic subunit beta-like	protein-coding
112009898	LOC112009898	40S ribosomal protein S12	protein-coding
112009261	LOC112009261	salutaridine reductase-like	protein-coding
112023711	LOC112023711	acid phosphatase 1-like	protein-coding
112037394	LOC112037394	major latex allergen Hev b 5-like	protein-coding
112004321	LOC112004321	mitogen-activated protein kinase kinase 9-like	protein-coding
112015692	LOC112015692	21 kDa protein-like	protein-coding
112004215	LOC112004215	uncharacterized LOC112004215	protein-coding
111986971	LOC111986971	ethylene-responsive transcription factor RAP2-4-like	protein-coding
112038967	LOC112038967	elongation factor 1-alpha-like	protein-coding
112012430	LOC112012430	protein STABILIZED1-like	protein-coding
112031701	LOC112031701	probable LRR receptor-like serine/threonine-protein kinase At3g47570	protein-coding
112008708	LOC112008708	endochitinase-like	pseudo
112001054	LOC112001054	uncharacterized LOC112001054	protein-coding
111989699	LOC111989699	60S ribosomal protein L26-1-like	protein-coding
112010976	LOC112010976	major allergen Pru av 1-like	protein-coding
112016552	LOC112016552	transcription factor LHW	protein-coding
112012484	LOC112012484	60S ribosomal protein L18a-like	protein-coding
112017548	LOC112017548	uncharacterized LOC112017548	ncRNA
111987593	LOC111987593	uncharacterized LOC111987593	protein-coding
111998487	LOC111998487	MLP-like protein 31	protein-coding
112033113	LOC112033113	2,3-bisphosphoglycerate-independent phosphoglycerate mutase-like	protein-coding
112005580	LOC112005580	putative methyltransferase DDB_G0268948	protein-coding
112001019	LOC112001019	10 kDa chaperonin-like	protein-coding
112016782	LOC112016782	uncharacterized LOC112016782	protein-coding
112006009	LOC112006009	major allergen Pru ar 1-like	protein-coding
111990740	LOC111990740	ABC transporter C family member 12-like	protein-coding
112002295	LOC112002295	1-aminocyclopropane-1-carboxylate oxidase homolog 4-like	protein-coding
112033423	LOC112033423	glycine-rich cell wall structural protein 1-like	protein-coding
112024345	LOC112024345	uncharacterized transporter C405.03c-like	protein-coding
112013784	LOC112013784	60S ribosomal protein L27-like	pseudo
112020914	LOC112020914	7-deoxyloganetin glucosyltransferase-like	protein-coding
111999482	LOC111999482	probable glutathione S-transferase	protein-coding
112040650	LOC112040650	5-methyltetrahydropteroyltriglutamate--homocysteine methyltransferase-like	protein-coding
111986794	LOC111986794	uncharacterized LOC111986794	protein-coding
111994460	LOC111994460	40S ribosomal protein S27-2-like	protein-coding
112016625	LOC112016625	28S ribosomal RNA	rRNA
112017864	LOC112017864	40S ribosomal protein S24-1-like	protein-coding
112037868	LOC112037868	G-type lectin S-receptor-like serine/threonine-protein kinase At4g27290	pseudo
112023278	LOC112023278	40S ribosomal protein S27-2-like	protein-coding
111986378	LOC111986378	uncharacterized LOC111986378	protein-coding
112004852	LOC112004852	60S ribosomal protein L6-1-like	protein-coding
112016817	LOC112016817	5.8S ribosomal RNA	rRNA
111988990	LOC111988990	laccase-7-like	protein-coding
111996737	LOC111996737	pleiotropic drug resistance protein 2-like	protein-coding
112003036	LOC112003036	uncharacterized LOC112003036	protein-coding
112034433	LOC112034433	late embryogenesis abundant protein At1g64065-like	protein-coding
112030009	LOC112030009	tRNA-dihydrouridine(16/17) synthase NAD(P)(+)	protein-coding
112010769	LOC112010769	60S ribosomal protein L28-2	protein-coding
111996771	LOC111996771	WD repeat-containing protein LWD1-like	protein-coding
112036410	LOC112036410	uncharacterized LOC112036410	protein-coding
112028327	LOC112028327	60S ribosomal protein L4-like	protein-coding
112019212	LOC112019212	uncharacterized LOC112019212	protein-coding
112008830	LOC112008830	probable WRKY transcription factor 17	protein-coding
111983968	LOC111983968	STOREKEEPER protein-like	protein-coding
112020603	LOC112020603	polyol transporter 5-like	protein-coding
112015496	LOC112015496	hexose carrier protein HEX6-like	protein-coding
112008556	LOC112008556	putative methyltransferase DDB_G0268948	protein-coding
112039641	LOC112039641	uncharacterized LOC112039641	protein-coding
111986933	LOC111986933	VQ motif-containing protein 33-like	protein-coding
112026449	LOC112026449	dihydrolipoyllysine-residue acetyltransferase component 4 of pyruvate dehydrogenase complex, chloroplastic	protein-coding
112008893	LOC112008893	uncharacterized LOC112008893	ncRNA
112004374	LOC112004374	amino acid permease 6-like	protein-coding
112016898	LOC112016898	28S ribosomal RNA	rRNA
112031868	LOC112031868	DNA-binding protein S1FA-like	protein-coding
112004210	LOC112004210	uncharacterized LOC112004210	protein-coding
112016117	LOC112016117	NAC transcription factor 29-like	protein-coding
112016719	LOC112016719	28S ribosomal RNA	rRNA
112008939	LOC112008939	caffeic acid 3-O-methyltransferase-like	protein-coding
111990374	LOC111990374	pyruvate kinase 2, cytosolic-like	protein-coding
112025391	LOC112025391	berberine bridge enzyme-like 8	protein-coding
112006695	LOC112006695	PAN domain-containing protein At5g03700	protein-coding
112025335	LOC112025335	ribulose bisphosphate carboxylase small chain clone 512-like	protein-coding
112004211	LOC112004211	uncharacterized LOC112004211	protein-coding
111984101	LOC111984101	40S ribosomal protein S4-3-like	protein-coding
112028784	LOC112028784	RING-H2 finger protein ATL64-like	protein-coding
112005202	LOC112005202	metal-nicotianamine transporter YSL3-like	protein-coding
112012112	LOC112012112	dof zinc finger protein DOF5.6	protein-coding
112025842	LOC112025842	precursor of CEP9-like	protein-coding
112013224	LOC112013224	receptor-like protein kinase HSL1	protein-coding
111996230	LOC111996230	zinc-finger homeodomain protein 5-like	protein-coding
112001675	LOC112001675	ethylene-responsive transcription factor 4-like	protein-coding
112035027	LOC112035027	berberine bridge enzyme-like 28	protein-coding
112009321	LOC112009321	non-specific lipid-transfer protein 2-like	protein-coding
112015556	LOC112015556	EG45-like domain containing protein	protein-coding
111993240	LOC111993240	enolase-like	protein-coding
112005214	LOC112005214	mitochondrial import receptor subunit TOM20-like	protein-coding
112038899	LOC112038899	serine/threonine-protein kinase D6PKL1	protein-coding
112018003	LOC112018003	nucleoside diphosphate kinase 1	protein-coding
111983380	LOC111983380	geraniol 8-hydroxylase-like	pseudo
112024671	LOC112024671	60S ribosomal protein L13-1-like	pseudo
112001882	LOC112001882	phospho-2-dehydro-3-deoxyheptonate aldolase 2, chloroplastic-like	protein-coding
112041061	LOC112041061	acanthoscurrin-1-like	protein-coding
111990894	LOC111990894	G-type lectin S-receptor-like serine/threonine-protein kinase RKS1	pseudo
111998752	LOC111998752	basic 7S globulin-like	protein-coding
112016819	LOC112016819	28S ribosomal RNA	rRNA
112006607	LOC112006607	transducin beta-like protein 3	protein-coding
112001057	LOC112001057	uncharacterized LOC112001057	protein-coding
112039376	LOC112039376	mitochondrial proton/calcium exchanger protein-like	protein-coding
111988815	LOC111988815	60S ribosomal protein L30-2-like	protein-coding
112033069	LOC112033069	60S ribosomal protein L30	protein-coding
112010624	LOC112010624	serine carboxypeptidase-like 18	protein-coding
112032135	LOC112032135	60S ribosomal protein L7-4-like	protein-coding
112016656	LOC112016656	60S ribosomal protein L30	protein-coding
112035331	LOC112035331	vinorine synthase-like	protein-coding
111987020	LOC111987020	cysteine-rich repeat secretory protein 55-like	protein-coding
111985513	LOC111985513	heavy metal-associated isoprenylated plant protein 7-like	protein-coding
111990868	LOC111990868	1-aminocyclopropane-1-carboxylate oxidase homolog 4-like	protein-coding
112022586	LOC112022586	polygalacturonase-1 non-catalytic subunit beta-like	protein-coding
111995957	LOC111995957	glycine-rich protein 2-like	protein-coding
112002134	LOC112002134	NADPH:quinone oxidoreductase-like	protein-coding
112030891	LOC112030891	DNA-binding protein S1FA-like	protein-coding
112031144	LOC112031144	isoliquiritigenin 2'-O-methyltransferase-like	protein-coding
112003040	LOC112003040	NDR1/HIN1-like protein 3	protein-coding
112037389	LOC112037389	major latex allergen Hev b 5-like	protein-coding
112032171	LOC112032171	serine/threonine-protein kinase STY13-like	protein-coding
112011701	LOC112011701	glutaredoxin-C9-like	protein-coding
112023890	LOC112023890	uncharacterized LOC112023890	protein-coding
111988592	LOC111988592	glucan endo-1,3-beta-glucosidase, basic vacuolar isoform-like	pseudo
111988360	LOC111988360	60S ribosomal protein L13-1	protein-coding
112015352	LOC112015352	uncharacterized LOC112015352	ncRNA
111998762	LOC111998762	uncharacterized protein At5g39865	protein-coding
112028170	LOC112028170	acanthoscurrin-1-like	protein-coding
111986322	LOC111986322	putative polyol transporter 1	protein-coding
112019413	LOC112019413	pyruvate decarboxylase 1	protein-coding
112030050	LOC112030050	bifunctional 3-dehydroquinate dehydratase/shikimate dehydrogenase, chloroplastic-like	protein-coding
112001051	LOC112001051	uncharacterized LOC112001051	protein-coding
112009388	LOC112009388	serine carboxypeptidase-like 45	protein-coding
111987024	LOC111987024	cysteine-rich repeat secretory protein 55-like	protein-coding
112032842	LOC112032842	high affinity sulfate transporter 2-like	protein-coding
112016735	LOC112016735	5.8S ribosomal RNA	rRNA
111994320	LOC111994320	berberine bridge enzyme-like 8	pseudo
111998304	LOC111998304	protein ECERIFERUM 1-like	protein-coding
112006867	LOC112006867	serine carboxypeptidase-like 46	protein-coding
112009979	LOC112009979	feruloyl CoA ortho-hydroxylase 1-like	protein-coding
112031052	LOC112031052	probable LRR receptor-like serine/threonine-protein kinase At3g47570	protein-coding
112034421	LOC112034421	late embryogenesis abundant protein At1g64065-like	protein-coding
112016613	LOC112016613	28S ribosomal RNA	pseudo
111984006	LOC111984006	28S ribosomal RNA	rRNA
112016816	LOC112016816	28S ribosomal RNA	rRNA
112012262	LOC112012262	60S acidic ribosomal protein P2-2-like	protein-coding
112039624	LOC112039624	dirigent protein 22-like	protein-coding
111997571	LOC111997571	multiple organellar RNA editing factor 1, mitochondrial	protein-coding
112026409	LOC112026409	aldose 1-epimerase-like	protein-coding
112022928	LOC112022928	uncharacterized LOC112022928	ncRNA
112028406	LOC112028406	60S ribosomal protein L4	protein-coding
111996787	LOC111996787	40S ribosomal protein SA-like	protein-coding
112022604	LOC112022604	pre-mRNA-processing factor 17-like	protein-coding
112010384	LOC112010384	vacuolar iron transporter 1-like	protein-coding
112040125	LOC112040125	uncharacterized LOC112040125	ncRNA
111997435	LOC111997435	crocetin glucosyltransferase, chloroplastic-like	pseudo
111993071	LOC111993071	isocitrate dehydrogenase NADP	protein-coding
112015617	LOC112015617	cytochrome P450 711A1	protein-coding
112004286	LOC112004286	probable pectinesterase/pectinesterase inhibitor 12	protein-coding
112035570	LOC112035570	histone-lysine N-methyltransferase, H3 lysine-9 specific SUVH4	protein-coding
111990498	LOC111990498	uncharacterized LOC111990498	protein-coding
111984348	LOC111984348	beta-amyrin synthase	protein-coding
112000377	LOC112000377	uncharacterized acetyltransferase At3g50280-like	protein-coding
112007260	LOC112007260	60S ribosomal protein L10-like	protein-coding
111989565	LOC111989565	uncharacterized LOC111989565	protein-coding
112002917	LOC112002917	receptor-like protein kinase HAIKU2	protein-coding
112011863	LOC112011863	abscisic acid receptor PYL8	protein-coding
111987360	LOC111987360	7-deoxyloganetin glucosyltransferase-like	protein-coding
111997436	LOC111997436	crocetin glucosyltransferase, chloroplastic-like	protein-coding
111995713	LOC111995713	protein ALP1-like	protein-coding
112016660	LOC112016660	28S ribosomal RNA	rRNA
112008978	LOC112008978	uncharacterized LOC112008978	protein-coding
111992131	LOC111992131	heat shock cognate protein 80	protein-coding
112024863	LOC112024863	UDP-glycosyltransferase 74E2-like	protein-coding
112015868	LOC112015868	15.4 kDa class V heat shock protein	protein-coding
112034423	LOC112034423	late embryogenesis abundant protein At1g64065-like	protein-coding
112038311	LOC112038311	40S ribosomal protein S10-1-like	protein-coding
112000357	LOC112000357	60S ribosomal protein L26-1	protein-coding
112015364	LOC112015364	pyruvate kinase, cytosolic isozyme	protein-coding
112040236	LOC112040236	glucan endo-1,3-beta-glucosidase, basic isoform-like	protein-coding
111994157	LOC111994157	uncharacterized LOC111994157	ncRNA
111991595	LOC111991595	glutathione S-transferase U19-like	protein-coding
112035353	LOC112035353	epidermis-specific secreted glycoprotein EP1-like	protein-coding
112015338	LOC112015338	MLP-like protein 43	protein-coding
111996136	LOC111996136	UDP-glycosyltransferase 83A1-like	protein-coding
111987387	LOC111987387	pyruvate kinase, cytosolic isozyme	protein-coding
112038613	LOC112038613	universal stress protein PHOS32	protein-coding
111984737	LOC111984737	MDIS1-interacting receptor like kinase 2-like	protein-coding
112018456	LOC112018456	NAC domain-containing protein 87-like	protein-coding
112000157	LOC112000157	probable glutathione S-transferase	protein-coding
112023588	LOC112023588	peroxisomal (S)-2-hydroxy-acid oxidase GLO4-like	pseudo
112038849	LOC112038849	60S ribosomal protein L27-like	pseudo
112028434	LOC112028434	uncharacterized LOC112028434	ncRNA
112006814	LOC112006814	transcription factor bHLH149-like	protein-coding
111999443	LOC111999443	auxin-induced in root cultures protein 12-like	protein-coding
112034026	LOC112034026	peroxidase 73-like	protein-coding
112004893	LOC112004893	7-deoxyloganetin glucosyltransferase-like	pseudo
112034174	LOC112034174	NADH dehydrogenase ubiquinone 1 beta subcomplex subunit 2	protein-coding
112040681	LOC112040681	probable glutathione S-transferase	protein-coding
111989602	LOC111989602	putative disease resistance RPP13-like protein 1	pseudo
111989603	LOC111989603	putative disease resistance RPP13-like protein 1	pseudo
112025923	LOC112025923	uncharacterized LOC112025923	ncRNA
112018935	LOC112018935	major allergen Pru ar 1-like	protein-coding
112026509	LOC112026509	enolase-like	protein-coding
112018341	LOC112018341	uncharacterized LOC112018341	protein-coding
112040656	LOC112040656	uncharacterized LOC112040656	protein-coding
112015305	LOC112015305	mitochondrial import receptor subunit TOM6 homolog	protein-coding
111997212	LOC111997212	probable glutathione S-transferase	protein-coding
112026477	LOC112026477	sulfoquinovosidase-like	protein-coding
111988698	LOC111988698	40S ribosomal protein S15a-1	protein-coding
112025095	LOC112025095	28S ribosomal RNA	rRNA
112034350	LOC112034350	cytochrome P450 81E8-like	protein-coding
111998943	LOC111998943	pyruvate kinase, cytosolic isozyme	protein-coding
112038294	LOC112038294	60S ribosomal protein L12	protein-coding
111988229	LOC111988229	ferritin, chloroplastic	protein-coding
112012433	LOC112012433	beta-amyrin 28-oxidase-like	protein-coding
111988156	LOC111988156	EIN3-binding F-box protein 1-like	protein-coding
111997053	LOC111997053	glutathione transferase GST 23-like	pseudo
112011641	LOC112011641	UDP-glycosyltransferase 89B1-like	protein-coding
112020654	LOC112020654	peroxisome biogenesis protein 16	protein-coding
112005051	LOC112005051	ABC transporter B family member 11-like	protein-coding
111984350	LOC111984350	beta-amyrin 28-oxidase-like	protein-coding
112015499	LOC112015499	hexose carrier protein HEX6-like	protein-coding
111984860	LOC111984860	AP2/ERF and B3 domain-containing transcription factor RAV1-like	protein-coding
112020578	LOC112020578	mitochondrial uncoupling protein 4-like	protein-coding
112032158	LOC112032158	gibberellin-regulated protein 14-like	protein-coding
112032424	LOC112032424	serine carboxypeptidase-like 40	protein-coding
111996705	LOC111996705	uncharacterized LOC111996705	protein-coding
111998714	LOC111998714	serine carboxypeptidase-like 40	protein-coding
112031574	LOC112031574	alcohol dehydrogenase 1-like	pseudo
112005658	LOC112005658	copper transporter 2-like	protein-coding
111987251	LOC111987251	probable pectinesterase/pectinesterase inhibitor 12	protein-coding
111983054	LOC111983054	60S ribosomal protein L35a-3	protein-coding
112016397	LOC112016397	crocetin glucosyltransferase, chloroplastic-like	pseudo
112040879	LOC112040879	monooxygenase 2-like	protein-coding
112003428	LOC112003428	uncharacterized LOC112003428	protein-coding
111993679	LOC111993679	bifunctional riboflavin biosynthesis protein RIBA 1, chloroplastic-like	pseudo
112016363	LOC112016363	crocetin glucosyltransferase, chloroplastic-like	protein-coding
112029000	LOC112029000	G-type lectin S-receptor-like serine/threonine-protein kinase At4g27290	pseudo
111993977	LOC111993977	ubiquitin-60S ribosomal protein L40-2-like	protein-coding
112003815	LOC112003815	hydroxymethylglutaryl-CoA synthase-like	protein-coding
111997525	LOC111997525	endo-1,3;1,4-beta-D-glucanase-like	protein-coding
112007347	LOC112007347	uncharacterized LOC112007347	protein-coding
111990501	LOC111990501	uncharacterized LOC111990501	protein-coding
112008620	LOC112008620	40S ribosomal protein S4-1-like	protein-coding
111987309	LOC111987309	60S ribosomal protein L8-3	protein-coding
112026065	LOC112026065	7-deoxyloganetin glucosyltransferase-like	protein-coding
112038365	LOC112038365	CASP-like protein 4D1	protein-coding
112022627	LOC112022627	bifunctional L-3-cyanoalanine synthase/cysteine synthase 1, mitochondrial-like	protein-coding
112027321	LOC112027321	uncharacterized serine-rich protein C215.13	protein-coding
112028189	LOC112028189	2-hydroxyacyl-CoA lyase	protein-coding
112036257	LOC112036257	ethylene-responsive transcription factor 5-like	protein-coding
111999064	LOC111999064	uncharacterized LOC111999064	protein-coding
112036539	LOC112036539	60S ribosomal protein L12	protein-coding
112012998	LOC112012998	LRR receptor-like serine/threonine-protein kinase RPK2	protein-coding
112035022	LOC112035022	uncharacterized LOC112035022	protein-coding
111995860	LOC111995860	uncharacterized LOC111995860	protein-coding
112025010	LOC112025010	plant cysteine oxidase 2-like	protein-coding
112040268	LOC112040268	40S ribosomal protein S23-like	protein-coding
111998313	LOC111998313	protein PIN-LIKES 3-like	protein-coding
112028237	LOC112028237	epoxide hydrolase A-like	protein-coding
111984558	LOC111984558	serine carboxypeptidase-like 13	protein-coding
111994525	LOC111994525	uncharacterized LOC111994525	pseudo
112015104	LOC112015104	early nodulin-75-like	protein-coding
112025564	LOC112025564	pectinesterase 2-like	protein-coding
112020954	LOC112020954	CASP-like protein 4D1	protein-coding
111990626	LOC111990626	uncharacterized LOC111990626	protein-coding
112039870	LOC112039870	laccase-14-like	protein-coding
111994236	LOC111994236	ABC transporter I family member 17-like	protein-coding
112019217	LOC112019217	uncharacterized LOC112019217	protein-coding
111993336	LOC111993336	phosphoethanolamine N-methyltransferase 1-like	protein-coding
111990174	LOC111990174	protodermal factor 1	protein-coding
112024826	LOC112024826	uncharacterized LOC112024826	ncRNA
112018401	LOC112018401	phosphoglycerate kinase, cytosolic	protein-coding
111997634	LOC111997634	guanine nucleotide-binding protein-like NSN1	pseudo
112008182	LOC112008182	ethylene-responsive transcription factor ERF003-like	protein-coding
112028354	LOC112028354	40S ribosomal protein S23	protein-coding
112028683	LOC112028683	AAA-ATPase ASD, mitochondrial-like	protein-coding
112019109	LOC112019109	serine/threonine-protein kinase Nek6-like	protein-coding
111991980	LOC111991980	putative ribosome biogenesis protein C8F11.04	protein-coding
112024202	LOC112024202	40S ribosomal protein S26-3-like	protein-coding
111987314	LOC111987314	60S ribosomal protein L8-3	protein-coding
112019356	LOC112019356	UDP-glycosyltransferase 74E2-like	protein-coding
111996463	LOC111996463	putative wall-associated receptor kinase-like 16	protein-coding
112032159	LOC112032159	S-adenosylmethionine synthase 3	protein-coding
112002959	LOC112002959	40S ribosomal protein S2-3-like	protein-coding
112008593	LOC112008593	protein JINGUBANG	protein-coding
112001794	LOC112001794	alanine aminotransferase 2-like	protein-coding
111994075	LOC111994075	40S ribosomal protein S28	protein-coding
111997443	LOC111997443	putative glycine-rich cell wall structural protein 1	protein-coding
112015926	LOC112015926	uncharacterized LOC112015926	pseudo
112030041	LOC112030041	probable cinnamyl alcohol dehydrogenase	protein-coding
111994394	LOC111994394	40S ribosomal protein S4-1-like	protein-coding
111997521	LOC111997521	endo-1,3;1,4-beta-D-glucanase-like	protein-coding
112017492	LOC112017492	hydroxymethylglutaryl-CoA synthase-like	protein-coding
112019336	LOC112019336	40S ribosomal protein S17-like	protein-coding
111987780	LOC111987780	protein NRT1/ PTR FAMILY 3.1-like	protein-coding
112034484	LOC112034484	geraniol 8-hydroxylase-like	protein-coding
112040880	LOC112040880	monooxygenase 2-like	protein-coding
111995168	LOC111995168	60S ribosomal protein L22-2	protein-coding
111997471	LOC111997471	uncharacterized LOC111997471	protein-coding
111984351	LOC111984351	beta-amyrin synthase-like	protein-coding
112008970	LOC112008970	uncharacterized LOC112008970	protein-coding
112000322	LOC112000322	ATP synthase gamma chain, chloroplastic-like	protein-coding
112034394	LOC112034394	endochitinase EP3-like	protein-coding
112036435	LOC112036435	protein NUCLEAR FUSION DEFECTIVE 4-like	protein-coding
112038142	LOC112038142	non-specific lipid transfer protein GPI-anchored 1	protein-coding
112020207	LOC112020207	probable inactive receptor kinase At4g23740	protein-coding
111996739	LOC111996739	pleiotropic drug resistance protein 2-like	protein-coding
112000464	LOC112000464	UDP-glycosyltransferase 87A1-like	protein-coding
112035278	LOC112035278	F-box/kelch-repeat protein At5g60570	protein-coding
112038856	LOC112038856	cysteine-rich repeat secretory protein 55-like	protein-coding
112029374	LOC112029374	probable 2-oxoglutarate-dependent dioxygenase At5g05600	pseudo
112001707	LOC112001707	uncharacterized LOC112001707	protein-coding
111993314	LOC111993314	40S ribosomal protein S11-1-like	protein-coding
112007699	LOC112007699	(+)-neomenthol dehydrogenase-like	protein-coding
112029332	LOC112029332	uncharacterized LOC112029332	protein-coding
112007202	LOC112007202	glycolipid transfer protein 3-like	protein-coding
112026690	LOC112026690	disease resistance-like protein DSC1	protein-coding
112020205	LOC112020205	ABC transporter C family member 10-like	protein-coding
112023516	LOC112023516	40S ribosomal protein S3-3	protein-coding
112034392	LOC112034392	endochitinase EP3-like	protein-coding
112028786	LOC112028786	60S ribosomal protein L18-2-like	protein-coding
112026092	LOC112026092	7-deoxyloganetin glucosyltransferase-like	protein-coding
112003033	LOC112003033	NDR1/HIN1-like protein 3	pseudo
112032563	LOC112032563	60S ribosomal protein L27	protein-coding
112015329	LOC112015329	aspartate aminotransferase, cytoplasmic	protein-coding
112000969	LOC112000969	plant intracellular Ras-group-related LRR protein 5-like	protein-coding
111989666	LOC111989666	hydroquinone glucosyltransferase-like	pseudo
111985100	LOC111985100	superoxide dismutase Mn, mitochondrial-like	protein-coding
112013825	LOC112013825	60S ribosomal protein L27-like	protein-coding
112027779	LOC112027779	7-deoxyloganetin glucosyltransferase-like	protein-coding
112040139	LOC112040139	uncharacterized LOC112040139	protein-coding
112034526	LOC112034526	mitochondrial import receptor subunit TOM7-1-like	protein-coding
112023958	LOC112023958	60S ribosomal protein L21-1	protein-coding
111991645	LOC111991645	60S ribosomal protein L12-like	protein-coding
112009239	LOC112009239	peroxidase 24-like	protein-coding
112027656	LOC112027656	glucan endo-1,3-beta-glucosidase	protein-coding
111992989	LOC111992989	H/ACA ribonucleoprotein complex subunit 4-like	protein-coding
112020612	LOC112020612	crocetin glucosyltransferase, chloroplastic-like	protein-coding
111993885	LOC111993885	uncharacterized LOC111993885	protein-coding
112022641	LOC112022641	40S ribosomal protein S15-1-like	pseudo
112041173	LOC112041173	ubiquitin carboxyl-terminal hydrolase 2	protein-coding
111984854	LOC111984854	40S ribosomal protein S12-like	protein-coding
112012521	LOC112012521	60S ribosomal protein L24-like	protein-coding
112019462	LOC112019462	60S ribosomal protein L36-2-like	protein-coding
112037154	LOC112037154	protein-tyrosine-phosphatase MKP1-like	protein-coding
111985820	LOC111985820	linoleate 13S-lipoxygenase 3-1, chloroplastic-like	protein-coding
112039627	LOC112039627	uncharacterized LOC112039627	protein-coding
112009018	LOC112009018	mitochondrial phosphate carrier protein 3, mitochondrial-like	protein-coding
112019120	LOC112019120	universal stress protein PHOS32-like	protein-coding
112027942	LOC112027942	40S ribosomal protein S2-3-like	protein-coding
112003658	LOC112003658	geraniol 8-hydroxylase-like	protein-coding
111993848	LOC111993848	protein NRT1/ PTR FAMILY 8.2-like	protein-coding
111994554	LOC111994554	probable pyridoxal 5'-phosphate synthase subunit PDX1	protein-coding
112032129	LOC112032129	60S ribosomal protein L7-4	protein-coding
111990979	LOC111990979	transcription factor bHLH128-like	protein-coding
112027354	LOC112027354	glycerol-3-phosphate dehydrogenase NAD(+) GPDHC1, cytosolic	protein-coding
112033542	LOC112033542	quinolinate synthase, chloroplastic	protein-coding
111988929	LOC111988929	large proline-rich protein BAG6	protein-coding
112021358	LOC112021358	60S ribosomal protein L14-2	protein-coding
112026429	LOC112026429	60S ribosomal protein L36-2-like	protein-coding
112033552	LOC112033552	ATPase 10, plasma membrane-type-like	protein-coding
112007509	LOC112007509	putative disease resistance protein At3g14460	protein-coding
112025797	LOC112025797	protein REVERSION-TO-ETHYLENE SENSITIVITY1-like	protein-coding
111994093	LOC111994093	plant cysteine oxidase 2-like	protein-coding
111989387	LOC111989387	uncharacterized LOC111989387	ncRNA
112012401	LOC112012401	60S ribosomal protein L10a	protein-coding
112025894	LOC112025894	protein EXORDIUM-like 2	protein-coding
111997157	LOC111997157	60S ribosomal protein L24	protein-coding
112008707	LOC112008707	endochitinase-like	protein-coding
112020925	LOC112020925	7-deoxyloganetin glucosyltransferase-like	pseudo
112028738	LOC112028738	nicotianamine synthase-like	protein-coding
112000805	LOC112000805	pescadillo homolog	protein-coding
112016787	LOC112016787	28S ribosomal RNA	pseudo
112026067	LOC112026067	7-deoxyloganetin glucosyltransferase-like	protein-coding
111987575	LOC111987575	probable WRKY transcription factor 72	protein-coding
111996444	LOC111996444	pectinesterase 3-like	protein-coding
111996892	LOC111996892	alpha-latroinsectotoxin-Lt1a-like	protein-coding
111999504	LOC111999504	probable glutathione S-transferase	protein-coding
112026322	LOC112026322	7-deoxyloganetin glucosyltransferase-like	protein-coding
112002208	LOC112002208	G-type lectin S-receptor-like serine/threonine-protein kinase At4g27290	protein-coding
111992778	LOC111992778	uncharacterized LOC111992778	protein-coding
111987146	LOC111987146	galactomannan galactosyltransferase 1-like	protein-coding
112038581	LOC112038581	uncharacterized LOC112038581	ncRNA
112002048	LOC112002048	thaumatin-like protein	pseudo
112006610	LOC112006610	callose synthase 2-like	protein-coding
112007885	LOC112007885	UDP-glycosyltransferase 89B1-like	protein-coding
112034996	LOC112034996	cucumber peeling cupredoxin-like	protein-coding
112032259	LOC112032259	protein NUCLEAR FUSION DEFECTIVE 6, chloroplastic/mitochondrial-like	protein-coding
112033023	LOC112033023	uncharacterized LOC112033023	protein-coding
112020818	LOC112020818	uncharacterized LOC112020818	protein-coding
112025714	LOC112025714	4-coumarate--CoA ligase-like 7	pseudo
112035679	LOC112035679	putative pentatricopeptide repeat-containing protein At1g64310	protein-coding
111998346	LOC111998346	60S ribosomal protein L3-2-like	protein-coding
111990872	LOC111990872	E3 ubiquitin-protein ligase ATL6-like	protein-coding
112036588	LOC112036588	non-specific lipid-transfer protein 3-like	protein-coding
112000291	LOC112000291	uncharacterized LOC112000291	protein-coding
112002323	LOC112002323	oligopeptide transporter 4-like	protein-coding
111989982	LOC111989982	ABC transporter B family member 4-like	protein-coding
112032957	LOC112032957	CBL-interacting protein kinase 23	protein-coding
112030631	LOC112030631	uncharacterized LOC112030631	ncRNA
112026982	LOC112026982	universal stress protein PHOS32-like	protein-coding
112034154	LOC112034154	cationic peroxidase 1-like	pseudo
111984642	LOC111984642	bifunctional dihydroflavonol 4-reductase/flavanone 4-reductase-like	protein-coding
112038862	LOC112038862	thaumatin-like protein 1	protein-coding
112007653	LOC112007653	E3 ubiquitin-protein ligase ATL6-like	protein-coding
111997946	LOC111997946	uridine-cytidine kinase C	protein-coding
112026613	LOC112026613	UDP-glycosyltransferase 89B1-like	protein-coding
111993819	LOC111993819	tetraketide alpha-pyrone reductase 1-like	protein-coding
111998303	LOC111998303	protein ECERIFERUM 1-like	protein-coding
112036584	LOC112036584	non-specific lipid-transfer protein 1-like	protein-coding
112023887	LOC112023887	endoglucanase 6	protein-coding
111990507	LOC111990507	uncharacterized LOC111990507	protein-coding
112003789	LOC112003789	umecyanin-like	protein-coding
112037478	LOC112037478	LOB domain-containing protein 40-like	protein-coding
112003628	LOC112003628	uncharacterized LOC112003628	ncRNA
112027288	LOC112027288	60S ribosomal protein L10a	protein-coding
111993076	LOC111993076	abscisic acid 8'-hydroxylase 1	protein-coding
112028526	LOC112028526	major allergen Pru ar 1-like	protein-coding
111999188	LOC111999188	endochitinase EP3-like	protein-coding
112001753	LOC112001753	pectinesterase 3-like	protein-coding
112004899	LOC112004899	probable alpha,alpha-trehalose-phosphate synthase UDP-forming 10	protein-coding
112026306	LOC112026306	probable ribose-5-phosphate isomerase 2	protein-coding
112037945	LOC112037945	universal stress protein PHOS32-like	protein-coding
112015152	LOC112015152	proline-rich receptor-like protein kinase PERK2	protein-coding
112027899	LOC112027899	peroxisomal (S)-2-hydroxy-acid oxidase GLO4-like	protein-coding
112031599	LOC112031599	60S ribosomal protein L34-like	protein-coding
112027438	LOC112027438	arogenate dehydratase/prephenate dehydratase 2, chloroplastic-like	protein-coding
112027991	LOC112027991	uncharacterized LOC112027991	protein-coding
112022631	LOC112022631	1-aminocyclopropane-1-carboxylate oxidase homolog 4-like	protein-coding
112039215	LOC112039215	universal stress protein PHOS34-like	protein-coding
111989001	LOC111989001	glycine-rich cell wall structural protein-like	protein-coding
112027897	LOC112027897	peroxisomal (S)-2-hydroxy-acid oxidase GLO4-like	protein-coding
112000865	LOC112000865	epoxide hydrolase A-like	protein-coding
112002894	LOC112002894	ETHYLENE INSENSITIVE 3-like 3 protein	protein-coding
112034469	LOC112034469	endoribonuclease YBEY, chloroplastic-like	protein-coding
112003126	LOC112003126	60S ribosomal protein L31-like	protein-coding
112020611	LOC112020611	crocetin glucosyltransferase, chloroplastic-like	protein-coding
112000354	LOC112000354	TMV resistance protein N-like	protein-coding
112010602	LOC112010602	protein ENHANCED PSEUDOMONAS SUSCEPTIBILTY 1-like	pseudo
111993092	LOC111993092	transcription factor CSA-like	protein-coding
112038705	LOC112038705	uncharacterized LOC112038705	protein-coding
112025701	LOC112025701	heavy metal-associated isoprenylated plant protein 5-like	protein-coding
112017238	LOC112017238	cytochrome P450 81E8-like	protein-coding
111988572	LOC111988572	siroheme synthase	protein-coding
112016168	LOC112016168	NDR1/HIN1-like protein 10	protein-coding
112038350	LOC112038350	leucine-rich repeat protein 1-like	protein-coding
112027346	LOC112027346	probable mitochondrial-processing peptidase subunit beta, mitochondrial	protein-coding
111993939	LOC111993939	F-box protein At2g27310	protein-coding
112037997	LOC112037997	HIPL1 protein	protein-coding
112016718	LOC112016718	18S ribosomal RNA	rRNA
112002038	LOC112002038	ABC transporter C family member 10-like	protein-coding
111996517	LOC111996517	uncharacterized LOC111996517	protein-coding
111983268	LOC111983268	cysteine-rich receptor-like protein kinase 41	protein-coding
111999670	LOC111999670	peroxidase 72-like	protein-coding
112024476	LOC112024476	uncharacterized LOC112024476	ncRNA
112033528	LOC112033528	high-affinity nitrate transporter 3.2	protein-coding
111990858	LOC111990858	uncharacterized LOC111990858	ncRNA
112025471	LOC112025471	40S ribosomal protein S14-3-like	protein-coding
112024483	LOC112024483	uncharacterized LOC112024483	pseudo
112034536	LOC112034536	60S ribosomal protein L6-like	protein-coding
112020047	LOC112020047	uncharacterized LOC112020047	ncRNA
111996713	LOC111996713	pleiotropic drug resistance protein 2-like	pseudo
111997902	LOC111997902	(+)-neomenthol dehydrogenase-like	protein-coding
111999366	LOC111999366	glutathione transferase GST 23-like	pseudo
112009322	LOC112009322	BOI-related E3 ubiquitin-protein ligase 1	protein-coding
111986834	LOC111986834	uncharacterized LOC111986834	protein-coding
112033284	LOC112033284	monooxygenase 2-like	protein-coding
112028684	LOC112028684	carbonic anhydrase 2-like	protein-coding
112027900	LOC112027900	peroxisomal (S)-2-hydroxy-acid oxidase GLO4-like	protein-coding
112024043	LOC112024043	uncharacterized LOC112024043	protein-coding
112000159	LOC112000159	probable glutathione S-transferase	protein-coding
112001520	LOC112001520	protein SICKLE-like	protein-coding
111985507	LOC111985507	uncharacterized LOC111985507	protein-coding
112015162	LOC112015162	glycine-rich cell wall structural protein-like	protein-coding
112002113	LOC112002113	adenosylhomocysteinase-like	protein-coding
112020558	LOC112020558	sodium/hydrogen exchanger 2-like	protein-coding
111989487	LOC111989487	protein MOTHER of FT and TFL1-like	protein-coding
112012939	LOC112012939	mitochondrial adenine nucleotide transporter ADNT1	protein-coding
112024763	LOC112024763	uncharacterized LOC112024763	protein-coding
111985943	LOC111985943	solute carrier family 35 member F2	protein-coding
112031843	LOC112031843	transcription factor MYB63-like	protein-coding
112008695	LOC112008695	protein DETOXIFICATION 49-like	protein-coding
111987409	LOC111987409	uncharacterized LOC111987409	protein-coding
112039578	LOC112039578	extensin-2-like	protein-coding
111991801	LOC111991801	uncharacterized protein At1g66480-like	protein-coding
112026612	LOC112026612	UDP-glycosyltransferase 89B1-like	pseudo
112028290	LOC112028290	7-deoxyloganetin glucosyltransferase-like	pseudo
112023983	LOC112023983	thioredoxin 1-like	protein-coding
111984331	LOC111984331	uncharacterized LOC111984331	protein-coding
112030894	LOC112030894	peroxidase 21	protein-coding
111997679	LOC111997679	protein SMG7-like	protein-coding
112003962	LOC112003962	cytochrome P450 94A2-like	pseudo
112022551	LOC112022551	protein MIZU-KUSSEI 1	protein-coding
112034951	LOC112034951	7-deoxyloganetin glucosyltransferase-like	pseudo
112004219	LOC112004219	polyadenylate-binding protein RBP47-like	protein-coding
111994048	LOC111994048	proteasome activator subunit 4	protein-coding
111999229	LOC111999229	H/ACA ribonucleoprotein complex subunit 4-like	protein-coding
112004539	LOC112004539	U-box domain-containing protein 33-like	protein-coding
111995998	LOC111995998	glutathione S-transferase U8-like	protein-coding
112016134	LOC112016134	oligopeptide transporter 4-like	protein-coding
111983043	LOC111983043	60S ribosomal protein L35a-3-like	protein-coding
112006011	LOC112006011	putative receptor-like protein kinase At4g00960	protein-coding
112026339	LOC112026339	protein EXORDIUM-like	protein-coding
112034582	LOC112034582	luminal-binding protein 5-like	protein-coding
111993074	LOC111993074	blue-light photoreceptor PHR2	protein-coding
112036398	LOC112036398	40S ribosomal protein S11-2	protein-coding
112030809	LOC112030809	uncharacterized LOC112030809	protein-coding
112040741	LOC112040741	cytochrome P450 81D11-like	protein-coding
112023612	LOC112023612	peroxisomal (S)-2-hydroxy-acid oxidase GLO4-like	protein-coding
112036731	LOC112036731	uncharacterized LOC112036731	protein-coding
112009123	LOC112009123	uncharacterized LOC112009123	ncRNA
112039850	LOC112039850	putative G3BP-like protein	protein-coding
111996618	LOC111996618	ABC transporter B family member 21-like	protein-coding
111992525	LOC111992525	prohibitin-3, mitochondrial-like	protein-coding
111992988	LOC111992988	60S ribosomal protein L36-2-like	protein-coding
112011651	LOC112011651	probable signal peptidase complex subunit 1	protein-coding
112011742	LOC112011742	glycine-rich cell wall structural protein	protein-coding
112040881	LOC112040881	monooxygenase 2-like	protein-coding
111995949	LOC111995949	uncharacterized LOC111995949	protein-coding
112026684	LOC112026684	DEAD-box ATP-dependent RNA helicase 18	protein-coding
112028296	LOC112028296	7-deoxyloganetin glucosyltransferase-like	protein-coding
112024158	LOC112024158	uncharacterized LOC112024158	protein-coding
112019064	LOC112019064	isoeugenol synthase 1-like	protein-coding
112039894	LOC112039894	LOB domain-containing protein 40-like	protein-coding
112033248	LOC112033248	probable glutathione S-transferase	protein-coding
111996147	LOC111996147	ethylene-responsive transcription factor 1B	protein-coding
112005481	LOC112005481	putative wall-associated receptor kinase-like 16	protein-coding
112022959	LOC112022959	60S ribosomal protein L10a-like	protein-coding
112026395	LOC112026395	transcription factor bHLH30-like	protein-coding
112011855	LOC112011855	zinc finger protein MAGPIE-like	protein-coding
112028748	LOC112028748	RNA pseudouridine synthase 1	protein-coding
112038191	LOC112038191	putative disease resistance protein RGA4	protein-coding
112027345	LOC112027345	acetyl-coenzyme A synthetase, chloroplastic/glyoxysomal	protein-coding
111994578	LOC111994578	protein MKS1-like	pseudo
112008720	LOC112008720	polyphenol oxidase, chloroplastic-like	protein-coding
111987568	LOC111987568	probable WRKY transcription factor 65	protein-coding
111993270	LOC111993270	sucrose synthase 7-like	protein-coding
112019878	LOC112019878	endochitinase EP3-like	protein-coding
112000085	LOC112000085	peroxidase 12-like	protein-coding
112040034	LOC112040034	glutathione S-transferase U17-like	protein-coding
112024484	LOC112024484	peptidyl-prolyl cis-trans isomerase FKBP15-1	protein-coding
111999873	LOC111999873	ketol-acid reductoisomerase, chloroplastic-like	protein-coding
112006907	LOC112006907	2-isopropylmalate synthase 2, chloroplastic-like	protein-coding
112030235	LOC112030235	nuclear intron maturase 3, mitochondrial-like	protein-coding
112030860	LOC112030860	polyubiquitin 11-like	protein-coding
112020595	LOC112020595	uncharacterized LOC112020595	protein-coding
112017835	LOC112017835	40S ribosomal protein S18-like	protein-coding
111994890	LOC111994890	cytochrome c	protein-coding
112038678	LOC112038678	geraniol 8-hydroxylase-like	protein-coding
112035803	LOC112035803	10 kDa chaperonin, mitochondrial-like	protein-coding
112019780	LOC112019780	guanylate kinase 3, chloroplastic	protein-coding
112019111	LOC112019111	G-type lectin S-receptor-like serine/threonine-protein kinase LECRK3	protein-coding
111991747	LOC111991747	40S ribosomal protein S16-like	protein-coding
112015185	LOC112015185	gallate 1-beta-glucosyltransferase	protein-coding
112006427	LOC112006427	UDP-arabinopyranose mutase 1-like	protein-coding
111993956	LOC111993956	beta-D-glucosyl crocetin beta-1,6-glucosyltransferase-like	protein-coding
112008638	LOC112008638	ethylene-responsive transcription factor ERF110-like	protein-coding
111992707	LOC111992707	protein SHI RELATED SEQUENCE 1	protein-coding
111990500	LOC111990500	uncharacterized LOC111990500	protein-coding
111985854	LOC111985854	G-type lectin S-receptor-like serine/threonine-protein kinase At1g11330	pseudo
112007402	LOC112007402	G-type lectin S-receptor-like serine/threonine-protein kinase At4g27290	protein-coding
112004955	LOC112004955	mitochondrial uncoupling protein 4-like	protein-coding
112038082	LOC112038082	probable acyl-activating enzyme 17, peroxisomal	protein-coding
112016869	LOC112016869	5.8S ribosomal RNA	rRNA
112039462	LOC112039462	flavonoid 3'-monooxygenase	protein-coding
111994797	LOC111994797	aspartic proteinase Asp1-like	protein-coding
112004518	LOC112004518	UDP-glycosyltransferase 89B2-like	protein-coding
112008343	LOC112008343	heterogeneous nuclear ribonucleoprotein Q	protein-coding
112033161	LOC112033161	60S acidic ribosomal protein P3-like	protein-coding
111987550	LOC111987550	LOB domain-containing protein 16	protein-coding
112034847	LOC112034847	aconitate hydratase, cytoplasmic	protein-coding
112039164	LOC112039164	60S ribosomal protein L32-1-like	protein-coding
112036026	LOC112036026	serine carboxypeptidase-like 33	protein-coding
111984937	LOC111984937	serine carboxypeptidase-like 51	protein-coding
112004400	LOC112004400	uncharacterized LOC112004400	ncRNA
112011949	LOC112011949	probable 2-oxoglutarate-dependent dioxygenase At5g05600	protein-coding
111992513	LOC111992513	lysine histidine transporter 1	protein-coding
112003698	LOC112003698	2,3-bisphosphoglycerate-independent phosphoglycerate mutase	protein-coding
112038565	LOC112038565	sphingolipid C9-methyltransferase 2-like	pseudo
111992087	LOC111992087	amino acid transporter AVT1C-like	protein-coding
112017994	LOC112017994	uncharacterized LOC112017994	protein-coding
112012656	LOC112012656	pentatricopeptide repeat-containing protein At2g32630-like	protein-coding
112028632	LOC112028632	DNA excision repair protein ERCC-1-like	protein-coding
111987021	LOC111987021	cysteine-rich repeat secretory protein 55-like	protein-coding
111999551	LOC111999551	60S ribosomal protein L23	protein-coding
112005470	LOC112005470	probable signal peptidase complex subunit 1	protein-coding
112023730	LOC112023730	protein yippee-like At4g27740	protein-coding
112005136	LOC112005136	ubiquitin-60S ribosomal protein L40-2	protein-coding
111983199	LOC111983199	probable WRKY transcription factor 75	protein-coding
112019464	LOC112019464	probable chalcone--flavonone isomerase 3	protein-coding
112000522	LOC112000522	protein REVERSION-TO-ETHYLENE SENSITIVITY1-like	protein-coding
112029431	LOC112029431	polyubiquitin-like	pseudo
112012657	LOC112012657	pentatricopeptide repeat-containing protein At2g32630-like	protein-coding
112033078	LOC112033078	protein P21-like	protein-coding
111991632	LOC111991632	putative methyltransferase DDB_G0268948	protein-coding
112040129	LOC112040129	pyruvate decarboxylase 2	protein-coding
111994705	LOC111994705	uncharacterized LOC111994705	protein-coding
112023365	LOC112023365	mitochondrial outer membrane protein porin of 34 kDa	protein-coding
111996733	LOC111996733	60S acidic ribosomal protein P2B-like	protein-coding
112020613	LOC112020613	polyol transporter 5-like	pseudo
112017362	LOC112017362	protein SENSITIVE TO PROTON RHIZOTOXICITY 1	protein-coding
111992061	LOC111992061	cysteine-rich repeat secretory protein 55-like	protein-coding
111990440	LOC111990440	gibberellin-regulated protein 1-like	protein-coding
112019357	LOC112019357	UDP-glycosyltransferase 74E2-like	protein-coding
112027581	LOC112027581	nucleolin 1-like	protein-coding
111994038	LOC111994038	uncharacterized LOC111994038	protein-coding
112022356	LOC112022356	dihydrolipoyl dehydrogenase 1, mitochondrial	protein-coding
111993849	LOC111993849	protein NRT1/ PTR FAMILY 8.2-like	protein-coding
112040887	LOC112040887	ubiquitin-like	pseudo
112031058	LOC112031058	F-box/kelch-repeat protein SKIP20-like	protein-coding
112036476	LOC112036476	CO(2)-response secreted protease-like	protein-coding
112018048	LOC112018048	peroxisomal (S)-2-hydroxy-acid oxidase GLO4-like	protein-coding
112018061	LOC112018061	leucine-rich repeat receptor protein kinase EMS1-like	protein-coding
112020620	LOC112020620	transcription termination factor MTERF15, mitochondrial-like	protein-coding
111985835	LOC111985835	uncharacterized LOC111985835	protein-coding
111991633	LOC111991633	putative methyltransferase DDB_G0268948	protein-coding
112007462	LOC112007462	fumarylacetoacetase	protein-coding
112030774	LOC112030774	guanine nucleotide-binding protein subunit beta-like protein	protein-coding
111990604	LOC111990604	uncharacterized LOC111990604	protein-coding
111994351	LOC111994351	E3 ubiquitin-protein ligase PUB23-like	protein-coding
111991923	LOC111991923	protein ETHYLENE INSENSITIVE 3-like	protein-coding
112031581	LOC112031581	cell wall / vacuolar inhibitor of fructosidase 2-like	protein-coding
111987795	LOC111987795	protein NRT1/ PTR FAMILY 3.1-like	pseudo
111994203	LOC111994203	protein NUCLEAR FUSION DEFECTIVE 4	protein-coding
112026428	LOC112026428	polyadenylate-binding protein 2-like	protein-coding
112002901	LOC112002901	UDP-glycosyltransferase 92A1-like	protein-coding
112032562	LOC112032562	60S ribosomal protein L27	protein-coding
112039735	LOC112039735	elongation factor 1-gamma 2-like	protein-coding
112020942	LOC112020942	cytochrome P450 94A2-like	protein-coding
111989395	LOC111989395	uncharacterized LOC111989395	ncRNA
112025527	LOC112025527	zeatin O-glucosyltransferase-like	protein-coding
111995633	LOC111995633	probable LRR receptor-like serine/threonine-protein kinase RFK1	protein-coding
112038700	LOC112038700	geraniol 8-hydroxylase-like	protein-coding
112011755	LOC112011755	adenylosuccinate lyase-like	protein-coding
112003731	LOC112003731	protein STABILIZED1-like	protein-coding
111984548	LOC111984548	serine carboxypeptidase-like 18	protein-coding
112022682	LOC112022682	uncharacterized LOC112022682	protein-coding
111997464	LOC111997464	uncharacterized LOC111997464	pseudo
111996475	LOC111996475	zinc finger protein GIS2-like	protein-coding
111985069	LOC111985069	40S ribosomal protein S26-1	protein-coding
112029430	LOC112029430	squamosa promoter-binding-like protein 6	protein-coding
111998643	LOC111998643	UDP-glycosyltransferase 73C3-like	protein-coding
112006689	LOC112006689	L-Ala-D/L-amino acid epimerase	protein-coding
111998751	LOC111998751	uncharacterized LOC111998751	protein-coding
111988462	LOC111988462	transketolase, chloroplastic	protein-coding
111988438	LOC111988438	transketolase, chloroplastic	protein-coding
112040673	LOC112040673	protein HOTHEAD	protein-coding
111994879	LOC111994879	cytochrome c	protein-coding
111994756	LOC111994756	cytochrome P450 94A2-like	pseudo
112016624	LOC112016624	18S ribosomal RNA	rRNA
111994527	LOC111994527	peptidyl-prolyl cis-trans isomerase CYP20-1	protein-coding
111990433	LOC111990433	gibberellin-regulated protein 1-like	protein-coding
112025507	LOC112025507	endoplasmin homolog	protein-coding
111984001	LOC111984001	receptor-like protein 9DC3	protein-coding
111998363	LOC111998363	flavin-containing monooxygenase FMO GS-OX-like 4	protein-coding
112025168	LOC112025168	uncharacterized acetyltransferase At3g50280-like	protein-coding
112016123	LOC112016123	beta-D-glucosyl crocetin beta-1,6-glucosyltransferase-like	protein-coding
112015203	LOC112015203	uncharacterized LOC112015203	protein-coding
112030425	LOC112030425	uncharacterized LOC112030425	protein-coding
112037392	LOC112037392	major latex allergen Hev b 5-like	pseudo
111991593	LOC111991593	glutathione transferase GST 23-like	protein-coding
112033397	LOC112033397	cold shock protein 1-like	protein-coding
112031611	LOC112031611	60S ribosomal protein L34	protein-coding
111986841	LOC111986841	protein disulfide-isomerase-like	protein-coding
112031433	LOC112031433	probable LRR receptor-like serine/threonine-protein kinase At1g74360	protein-coding
112028270	LOC112028270	ruvB-like protein 1	protein-coding
112022960	LOC112022960	caffeic acid 3-O-methyltransferase-like	protein-coding
112013819	LOC112013819	uncharacterized LOC112013819	protein-coding
112000313	LOC112000313	probable aminotransferase TAT2	protein-coding
112008915	LOC112008915	DNA-directed RNA polymerase I subunit RPA12	protein-coding
112028460	LOC112028460	cytochrome c	protein-coding
112000228	LOC112000228	2-(3-amino-3-carboxypropyl)histidine synthase subunit 2-like	protein-coding
111992370	LOC111992370	disease resistance protein RPM1-like	protein-coding
112031842	LOC112031842	ubiquitin-NEDD8-like protein RUB2	protein-coding
112002236	LOC112002236	40S ribosomal protein S10-2-like	protein-coding
112009478	LOC112009478	uncharacterized LOC112009478	protein-coding
112003372	LOC112003372	putative H/ACA ribonucleoprotein complex subunit 1-like protein 1	protein-coding
112016386	LOC112016386	probable pectinesterase/pectinesterase inhibitor 7	protein-coding
111984354	LOC111984354	beta-amyrin synthase-like	protein-coding
111986089	LOC111986089	uncharacterized LOC111986089	protein-coding
112039196	LOC112039196	aspartyl protease family protein At5g10770-like	protein-coding
112021134	LOC112021134	sulfoquinovosyl transferase SQD2-like	protein-coding
112022786	LOC112022786	aconitate hydratase 1	protein-coding
111991012	LOC111991012	18S ribosomal RNA	rRNA
112027130	LOC112027130	zinc finger protein ZAT9-like	protein-coding
112023313	LOC112023313	40S ribosomal protein S21-2	protein-coding
112038945	LOC112038945	uncharacterized LOC112038945	protein-coding
111990615	LOC111990615	pre-mRNA-processing-splicing factor 8A-like	protein-coding
112022963	LOC112022963	ferredoxin, root R-B2-like	protein-coding
111994702	LOC111994702	shikimate O-hydroxycinnamoyltransferase-like	protein-coding
112017239	LOC112017239	cytochrome P450 81D1-like	protein-coding
112033110	LOC112033110	crocetin glucosyltransferase, chloroplastic-like	protein-coding
112005204	LOC112005204	cytochrome b5	protein-coding
111987450	LOC111987450	non-specific lipid-transfer protein-like protein At2g13820	protein-coding
112010679	LOC112010679	serine carboxypeptidase-like 7	protein-coding
112022643	LOC112022643	40S ribosomal protein S15-1-like	pseudo
112001111	LOC112001111	putative disease resistance RPP13-like protein 1	protein-coding
111988899	LOC111988899	uncharacterized LOC111988899	protein-coding
111992189	LOC111992189	protein NRT1/ PTR FAMILY 5.10-like	protein-coding
112001010	LOC112001010	serine carboxypeptidase-like 46	protein-coding
112020065	LOC112020065	protein RETICULATA-RELATED 1, chloroplastic-like	protein-coding
112029381	LOC112029381	probably inactive leucine-rich repeat receptor-like protein kinase At2g25790	protein-coding
112028942	LOC112028942	late embryogenesis abundant protein At1g64065-like	protein-coding
112039265	LOC112039265	aspartic proteinase Asp1-like	protein-coding
112006959	LOC112006959	laccase-14-like	protein-coding
112029717	LOC112029717	60S ribosomal protein L39-3	protein-coding
111994534	LOC111994534	thiamine-repressible mitochondrial transport protein THI74-like	protein-coding
111992272	LOC111992272	protein P21-like	protein-coding
112018099	LOC112018099	ethylene-responsive transcription factor 1B-like	protein-coding
112038535	LOC112038535	structural maintenance of chromosomes protein 4-like	protein-coding
112006102	LOC112006102	spermine synthase	protein-coding
112034715	LOC112034715	cinnamoyl-CoA reductase-like SNL6	protein-coding
112017567	LOC112017567	ACT domain-containing protein ACR4-like	protein-coding
112022521	LOC112022521	NDR1/HIN1-like protein 26	protein-coding
112000247	LOC112000247	low-temperature-induced cysteine proteinase-like	protein-coding
111995608	LOC111995608	uncharacterized LOC111995608	protein-coding
112012490	LOC112012490	uncharacterized LOC112012490	ncRNA
112028407	LOC112028407	uncharacterized protein At4g06744-like	protein-coding
112007575	LOC112007575	cinnamoyl-CoA reductase-like SNL6	protein-coding
112014185	LOC112014185	CASP-like protein 2D1	protein-coding
112036699	LOC112036699	GDSL esterase/lipase At1g31550-like	protein-coding
112015949	LOC112015949	60S ribosomal protein L44	protein-coding
112018876	LOC112018876	60S ribosomal protein L27-like	protein-coding
112025743	LOC112025743	transcription factor TCP4-like	protein-coding
112003626	LOC112003626	60S ribosomal protein L37a-1	protein-coding
111984950	LOC111984950	UDP-glycosyltransferase 73C6-like	protein-coding
111988722	LOC111988722	hydroquinone glucosyltransferase-like	protein-coding
111990441	LOC111990441	ERC protein 2	protein-coding
112039502	LOC112039502	40S ribosomal protein S6-like	protein-coding
112035319	LOC112035319	hydroquinone glucosyltransferase-like	protein-coding
112011777	LOC112011777	glyceraldehyde-3-phosphate dehydrogenase GAPCP2, chloroplastic	protein-coding
111987063	LOC111987063	shikimate O-hydroxycinnamoyltransferase-like	protein-coding
112000274	LOC112000274	uncharacterized LOC112000274	protein-coding
112019355	LOC112019355	UDP-glycosyltransferase 74E1-like	protein-coding
112022202	LOC112022202	probable 1-deoxy-D-xylulose-5-phosphate synthase 2, chloroplastic	protein-coding
112016659	LOC112016659	18S ribosomal RNA	rRNA
112035023	LOC112035023	GEM-like protein 5	protein-coding
112015981	LOC112015981	gamma carbonic anhydrase 1, mitochondrial-like	protein-coding
112029714	LOC112029714	60S ribosomal protein L39-1	protein-coding
112004686	LOC112004686	transcription factor MYB41-like	protein-coding
111988494	LOC111988494	ubiquitin-like-specific protease ESD4	protein-coding
111991494	LOC111991494	cytochrome c oxidase copper chaperone 1-like	protein-coding
111995108	LOC111995108	beta-galactosidase 17-like	protein-coding
112026432	LOC112026432	uncharacterized acetyltransferase At3g50280-like	protein-coding
111990429	LOC111990429	gibberellin-regulated protein 1-like	protein-coding
112003038	LOC112003038	uncharacterized LOC112003038	protein-coding
112028347	LOC112028347	homeobox-leucine zipper protein HOX11	protein-coding
112039719	LOC112039719	uncharacterized LOC112039719	protein-coding
112024067	LOC112024067	uncharacterized LOC112024067	protein-coding
111999430	LOC111999430	transcription factor GTE6-like	protein-coding
112019090	LOC112019090	putative disease resistance RPP13-like protein 1	protein-coding
112012660	LOC112012660	non-specific lipid-transfer protein 1-like	protein-coding
112009724	LOC112009724	uncharacterized LOC112009724	protein-coding
111988581	LOC111988581	protein transport protein SEC31 homolog B-like	pseudo
112011142	LOC112011142	UNC93-like protein 1	protein-coding
112000409	LOC112000409	trifunctional UDP-glucose 4,6-dehydratase/UDP-4-keto-6-deoxy-D-glucose 3,5-epimerase/UDP-4-keto-L-rhamnose-reductase RHM2-like	protein-coding
111996551	LOC111996551	cysteine-rich receptor-like protein kinase 10	protein-coding
111988596	LOC111988596	serine carboxypeptidase-like 40	protein-coding
112028751	LOC112028751	D-aminoacyl-tRNA deacylase	protein-coding
112033154	LOC112033154	uncharacterized LOC112033154	ncRNA
111983023	LOC111983023	probable indole-3-pyruvate monooxygenase YUCCA4	protein-coding
112032843	LOC112032843	sulfate transporter 1.3-like	protein-coding
112010616	LOC112010616	UDP-glycosyltransferase 89B2-like	protein-coding
112025328	LOC112025328	U-box domain-containing protein 33-like	protein-coding
112033276	LOC112033276	multiprotein-bridging factor 1a	protein-coding
111998745	LOC111998745	uncharacterized isomerase BH0283-like	protein-coding
112040089	LOC112040089	glutathione reductase, chloroplastic	protein-coding
112008230	LOC112008230	tRNA-dihydrouridine(20/20a) synthase-like	protein-coding
111985876	LOC111985876	60S ribosomal protein L8-3	protein-coding
111995830	LOC111995830	copper transporter 6-like	protein-coding
112027908	LOC112027908	protein SRG1-like	protein-coding
112025406	LOC112025406	probable leucine-rich repeat receptor-like serine/threonine-protein kinase At3g14840	protein-coding
112027829	LOC112027829	tRNA-dihydrouridine(20/20a) synthase-like	protein-coding
112016271	LOC112016271	alpha-N-acetylglucosaminidase-like	protein-coding
111986981	LOC111986981	plant cysteine oxidase 2-like	protein-coding
112037393	LOC112037393	E3 ubiquitin-protein ligase UPL5-like	protein-coding
111986057	LOC111986057	serine carboxypeptidase-like 40	protein-coding
111995150	LOC111995150	26S proteasome regulatory subunit 6A homolog	protein-coding
112003767	LOC112003767	GDSL esterase/lipase At5g45670-like	protein-coding
112020607	LOC112020607	transcription termination factor MTERF15, mitochondrial-like	protein-coding
112027570	LOC112027570	uncharacterized LOC112027570	ncRNA
112033366	LOC112033366	uncharacterized LOC112033366	ncRNA
112024857	LOC112024857	abscisic stress-ripening protein 3-like	protein-coding
112012733	LOC112012733	uncharacterized LOC112012733	protein-coding
111991841	LOC111991841	GDSL esterase/lipase EXL3-like	protein-coding
111985033	LOC111985033	40S ribosomal protein S27-2	protein-coding
112034538	LOC112034538	universal stress protein A-like protein	protein-coding
112038484	LOC112038484	ATP-dependent DNA helicase homolog RECG, chloroplastic-like	protein-coding
112002032	LOC112002032	ABC transporter C family member 10-like	protein-coding
112028705	LOC112028705	cationic peroxidase 1-like	protein-coding
112040638	LOC112040638	phosphoserine aminotransferase 1, chloroplastic-like	pseudo
111986910	LOC111986910	altered inheritance rate of mitochondria protein 25-like	protein-coding
111992994	LOC111992994	mitochondrial import inner membrane translocase subunit Tim9-like	protein-coding
112021194	LOC112021194	protein IWS1 homolog A	protein-coding
111991568	LOC111991568	lipid transfer-like protein VAS	protein-coding
112023863	LOC112023863	uncharacterized LOC112023863	protein-coding
111988838	LOC111988838	probable sulfate transporter 3.5	protein-coding
111996865	LOC111996865	40S ribosomal protein S9-2	protein-coding
112038704	LOC112038704	LEAF RUST 10 DISEASE-RESISTANCE LOCUS RECEPTOR-LIKE PROTEIN KINASE-like 2.4	protein-coding
112013995	LOC112013995	60S ribosomal protein L13-1-like	protein-coding
112017894	LOC112017894	18.5 kDa class I heat shock protein-like	protein-coding
111997351	LOC111997351	1-aminocyclopropane-1-carboxylate oxidase 1	protein-coding
112028495	LOC112028495	heat shock protein 90-6, mitochondrial	protein-coding
112012517	LOC112012517	uncharacterized LOC112012517	protein-coding
112013152	LOC112013152	uncharacterized LOC112013152	protein-coding
112001568	LOC112001568	origin of replication complex subunit 6-like	protein-coding

## Sheet: Table S4
Table S4.- List of Differentially Expressed Genes identified in the Wounding+IBA samples. The corresponding Gene Symbol for the Quercus suber gene is given.
Gene ID	Gene Symbol	Gene name	Gene Type
112013628	LOC112013628	proline-rich extensin-like protein EPR1	protein-coding
111993633	LOC111993633	early nodulin-75-like	protein-coding
112013622	LOC112013622	early nodulin-75-like	pseudo
112021059	LOC112021059	proline-rich extensin-like protein EPR1	protein-coding
111999225	LOC111999225	plastid division protein PDV2-like	protein-coding
112021062	LOC112021062	early nodulin-75-like	protein-coding
111997526	LOC111997526	endo-1,3;1,4-beta-D-glucanase-like	protein-coding
112039616	LOC112039616	early nodulin-75-like	protein-coding
112033748	LOC112033748	formate dehydrogenase, mitochondrial	protein-coding
111986359	LOC111986359	early nodulin-75-like	pseudo
112016635	LOC112016635	early nodulin-75-like	protein-coding
112034153	LOC112034153	cationic peroxidase 1-like	pseudo
112027987	LOC112027987	early nodulin-93-like	protein-coding
112013623	LOC112013623	early nodulin-75-like	protein-coding
112013627	LOC112013627	proline-rich 33 kDa extensin-related protein-like	protein-coding
112037394	LOC112037394	major latex allergen Hev b 5-like	protein-coding
112006270	LOC112006270	endo-1,3;1,4-beta-D-glucanase-like	protein-coding
112037389	LOC112037389	major latex allergen Hev b 5-like	protein-coding
111999906	LOC111999906	bifunctional L-3-cyanoalanine synthase/cysteine synthase 1, mitochondrial	protein-coding
112028236	LOC112028236	epoxide hydrolase A-like	protein-coding
111999488	LOC111999488	probable glutathione S-transferase	protein-coding
112009987	LOC112009987	early nodulin-75-like	protein-coding
112029612	LOC112029612	monooxygenase 2-like	pseudo
111994220	LOC111994220	fructose-bisphosphate aldolase 6, cytosolic	protein-coding
112028558	LOC112028558	peroxidase P7-like	protein-coding
112034273	LOC112034273	histidine-rich glycoprotein-like	protein-coding
111993694	LOC111993694	early nodulin-75-like	protein-coding
111984856	LOC111984856	ethylene-responsive transcription factor RAP2-3-like	protein-coding
111983162	LOC111983162	uncharacterized LOC111983162	protein-coding
112037392	LOC112037392	major latex allergen Hev b 5-like	pseudo
112034086	LOC112034086	uncharacterized LOC112034086	ncRNA
112019251	LOC112019251	cationic peroxidase 1-like	protein-coding
111985052	LOC111985052	ethylene-responsive transcription factor ERF113-like	protein-coding
112034238	LOC112034238	glycine-rich protein DC7.1-like	protein-coding
112032818	LOC112032818	glutathione S-transferase U8-like	pseudo
112035443	LOC112035443	NAC domain-containing protein 2-like	protein-coding
112024966	LOC112024966	ferredoxin--nitrite reductase, chloroplastic	protein-coding
111985470	LOC111985470	glyceraldehyde-3-phosphate dehydrogenase, cytosolic	protein-coding
111997018	LOC111997018	glycine-rich protein DC7.1-like	protein-coding
112034155	LOC112034155	cationic peroxidase 1-like	protein-coding
112015352	LOC112015352	uncharacterized LOC112015352	ncRNA
112034269	LOC112034269	dormancy-associated protein 2-like	protein-coding
111997521	LOC111997521	endo-1,3;1,4-beta-D-glucanase-like	protein-coding
111995154	LOC111995154	uncharacterized LOC111995154	protein-coding
111983054	LOC111983054	60S ribosomal protein L35a-3	protein-coding
112006022	LOC112006022	ethylene-responsive transcription factor RAP2-3-like	protein-coding
112035569	LOC112035569	ethylene-responsive transcription factor ERF113-like	protein-coding
111997675	LOC111997675	40S ribosomal protein S13-like	protein-coding
112020180	LOC112020180	ethylene-responsive transcription factor RAP2-3-like	protein-coding
112032867	LOC112032867	heavy metal-associated isoprenylated plant protein 39-like	protein-coding
112032129	LOC112032129	60S ribosomal protein L7-4	protein-coding
112001059	LOC112001059	uncharacterized LOC112001059	protein-coding
112001060	LOC112001060	uncharacterized LOC112001060	protein-coding
112006346	LOC112006346	probable aldo-keto reductase 2	protein-coding
111997295	LOC111997295	uncharacterized LOC111997295	ncRNA
111986377	LOC111986377	uncharacterized LOC111986377	protein-coding
112028782	LOC112028782	epoxide hydrolase A-like	protein-coding
112039625	LOC112039625	dirigent protein 22-like	protein-coding
112003971	LOC112003971	caffeic acid 3-O-methyltransferase-like	protein-coding
112020158	LOC112020158	pathogenesis-related genes transcriptional activator PTI5-like	protein-coding
111997180	LOC111997180	alcohol dehydrogenase 1	protein-coding
111991037	LOC111991037	2-alkenal reductase (NADP(+)-dependent)-like	protein-coding
112008972	LOC112008972	alcohol dehydrogenase-like	protein-coding
112039050	LOC112039050	36.4 kDa proline-rich protein	protein-coding
112017318	LOC112017318	expansin-A4-like	protein-coding
112024903	LOC112024903	pyruvate kinase 1, cytosolic	protein-coding
112031573	LOC112031573	alcohol dehydrogenase-like	protein-coding
112010973	LOC112010973	glutathione S-transferase U10-like	protein-coding
112033819	LOC112033819	probable aldo-keto reductase 2	protein-coding
112010945	LOC112010945	probable glutathione S-transferase	protein-coding
112017864	LOC112017864	40S ribosomal protein S24-1-like	protein-coding
111998054	LOC111998054	probable aldo-keto reductase 2	protein-coding
112026509	LOC112026509	enolase-like	protein-coding
112021099	LOC112021099	probable glutathione S-transferase	protein-coding
111987251	LOC111987251	probable pectinesterase/pectinesterase inhibitor 12	protein-coding
112038311	LOC112038311	40S ribosomal protein S10-1-like	protein-coding
112028406	LOC112028406	60S ribosomal protein L4	protein-coding
112021201	LOC112021201	protein ATAF2-like	protein-coding
112031590	LOC112031590	glutathione S-transferase U10-like	protein-coding
112008556	LOC112008556	putative methyltransferase DDB_G0268948	protein-coding
112035116	LOC112035116	cysteine-rich repeat secretory protein 38-like	protein-coding
112021638	LOC112021638	probable glutathione S-transferase parC	protein-coding
112020432	LOC112020432	probable glutathione S-transferase	protein-coding
111984854	LOC111984854	40S ribosomal protein S12-like	protein-coding
112025926	LOC112025926	2-alkenal reductase (NADP(+)-dependent)-like	protein-coding
112015949	LOC112015949	60S ribosomal protein L44	protein-coding
112010940	LOC112010940	probable glutathione S-transferase parC	protein-coding
112028290	LOC112028290	7-deoxyloganetin glucosyltransferase-like	pseudo
112028237	LOC112028237	epoxide hydrolase A-like	protein-coding
112010520	LOC112010520	putative UDP-rhamnose:rhamnosyltransferase 1	protein-coding
112031617	LOC112031617	glutathione S-transferase U10-like	protein-coding
111994365	LOC111994365	endochitinase 2-like	protein-coding
112029735	LOC112029735	isoflavone reductase-like protein	pseudo
112039561	LOC112039561	endochitinase 2-like	protein-coding
112000275	LOC112000275	acidic endochitinase-like	protein-coding
112004565	LOC112004565	acidic endochitinase-like	protein-coding
112003626	LOC112003626	60S ribosomal protein L37a-1	protein-coding
111997931	LOC111997931	60S ribosomal protein L24-like	protein-coding
112028327	LOC112028327	60S ribosomal protein L4-like	protein-coding
112000674	LOC112000674	60S ribosomal protein L37a-1	protein-coding
112034228	LOC112034228	glycine-rich protein DC7.1-like	protein-coding
112036398	LOC112036398	40S ribosomal protein S11-2	protein-coding
112036410	LOC112036410	uncharacterized LOC112036410	protein-coding
112028209	LOC112028209	transcription factor MYB4-like	protein-coding
112004021	LOC112004021	60S ribosomal protein L24-like	protein-coding
112030015	LOC112030015	bifunctional 3-dehydroquinate dehydratase/shikimate dehydrogenase, chloroplastic-like	protein-coding
112027826	LOC112027826	60S ribosomal protein L7-4-like	protein-coding
112014044	LOC112014044	acidic endochitinase-like	protein-coding
112012401	LOC112012401	60S ribosomal protein L10a	protein-coding
111999486	LOC111999486	probable glutathione S-transferase	protein-coding
112027288	LOC112027288	60S ribosomal protein L10a	protein-coding
111993884	LOC111993884	ethylene receptor 2-like	protein-coding
112035803	LOC112035803	10 kDa chaperonin, mitochondrial-like	protein-coding
112014108	LOC112014108	ethylene-responsive transcription factor ERF113-like	protein-coding
112030631	LOC112030631	uncharacterized LOC112030631	ncRNA
111995985	LOC111995985	glutathione S-transferase U8-like	protein-coding
112001707	LOC112001707	uncharacterized LOC112001707	protein-coding
112030338	LOC112030338	cysteine proteinase inhibitor 5-like	protein-coding
111989566	LOC111989566	uncharacterized LOC111989566	protein-coding
112038581	LOC112038581	uncharacterized LOC112038581	ncRNA
112023892	LOC112023892	cationic peroxidase 1-like	protein-coding
112002959	LOC112002959	40S ribosomal protein S2-3-like	protein-coding
111993314	LOC111993314	40S ribosomal protein S11-1-like	protein-coding
112004857	LOC112004857	40S ribosomal protein S7-1-like	protein-coding
111994370	LOC111994370	uncharacterized LOC111994370	protein-coding
112008673	LOC112008673	uncharacterized LOC112008673	protein-coding
112030339	LOC112030339	cysteine proteinase inhibitor 5-like	protein-coding
112012262	LOC112012262	60S acidic ribosomal protein P2-2-like	protein-coding
112033069	LOC112033069	60S ribosomal protein L30	protein-coding
112004964	LOC112004964	oxalate--CoA ligase-like	protein-coding
112016656	LOC112016656	60S ribosomal protein L30	protein-coding
111999542	LOC111999542	40S ribosomal protein S7-like	protein-coding
112001702	LOC112001702	uncharacterized LOC112001702	ncRNA
112033554	LOC112033554	glutathione S-transferase-like	protein-coding
112031754	LOC112031754	S-adenosylmethionine decarboxylase proenzyme-like	protein-coding
111998055	LOC111998055	probable aldo-keto reductase 2	protein-coding
111997463	LOC111997463	uncharacterized LOC111997463	protein-coding
112008229	LOC112008229	60S ribosomal protein L7-2	protein-coding
112024980	LOC112024980	expansin-A8-like	protein-coding
112040683	LOC112040683	glutathione transferase GST 23-like	protein-coding
112011974	LOC112011974	60S ribosomal protein L18a	protein-coding
111997212	LOC111997212	probable glutathione S-transferase	protein-coding
111999551	LOC111999551	60S ribosomal protein L23	protein-coding
112030016	LOC112030016	bifunctional 3-dehydroquinate dehydratase/shikimate dehydrogenase, chloroplastic-like	protein-coding
112040681	LOC112040681	probable glutathione S-transferase	protein-coding
112015494	LOC112015494	delta(12)-fatty-acid desaturase FAD2	protein-coding
111994139	LOC111994139	protein P21-like	protein-coding
111989517	LOC111989517	stearoyl-acyl-carrier-protein 9-desaturase 6, chloroplastic	protein-coding
112001058	LOC112001058	uncharacterized LOC112001058	protein-coding
112025054	LOC112025054	alcohol dehydrogenase 1-like	protein-coding
111998829	LOC111998829	auxin-induced protein 22D-like	protein-coding
112029672	LOC112029672	thaumatin-like protein 1	protein-coding
111991492	LOC111991492	short-chain dehydrogenase TIC 32, chloroplastic	protein-coding
112012928	LOC112012928	40S ribosomal protein S5-like	protein-coding
111997529	LOC111997529	protein P21-like	protein-coding
112025394	LOC112025394	isoflavone reductase-like protein	protein-coding
112022319	LOC112022319	uncharacterized LOC112022319	protein-coding
111988815	LOC111988815	60S ribosomal protein L30-2-like	protein-coding
112013874	LOC112013874	probable glutathione S-transferase	protein-coding
112035335	LOC112035335	cysteine-rich repeat secretory protein 38-like	pseudo
112028296	LOC112028296	7-deoxyloganetin glucosyltransferase-like	protein-coding
111992134	LOC111992134	abscisate beta-glucosyltransferase-like	protein-coding
111985947	LOC111985947	cationic peroxidase 1-like	protein-coding
111986376	LOC111986376	uncharacterized LOC111986376	protein-coding
112017218	LOC112017218	protein DETOXIFICATION 33-like	protein-coding
112025307	LOC112025307	serine carboxypeptidase-like 3	protein-coding
111987787	LOC111987787	protein NRT1/ PTR FAMILY 3.1-like	protein-coding
112014050	LOC112014050	protein DETOXIFICATION 33-like	protein-coding
112005133	LOC112005133	uncharacterized protein At2g34160-like	protein-coding
112038845	LOC112038845	uncharacterized LOC112038845	protein-coding
111985483	LOC111985483	uncharacterized LOC111985483	protein-coding
111997522	LOC111997522	endo-1,3;1,4-beta-D-glucanase-like	protein-coding
111997959	LOC111997959	scopoletin glucosyltransferase-like	protein-coding
112002344	LOC112002344	protein DETOXIFICATION 16-like	protein-coding
112022510	LOC112022510	60S acidic ribosomal protein P1	protein-coding
112040974	LOC112040974	ethylene-responsive transcription factor 4-like	protein-coding
112020914	LOC112020914	7-deoxyloganetin glucosyltransferase-like	protein-coding
111993956	LOC111993956	beta-D-glucosyl crocetin beta-1,6-glucosyltransferase-like	protein-coding
112039869	LOC112039869	laccase-14-like	protein-coding
111991668	LOC111991668	abscisate beta-glucosyltransferase-like	protein-coding
112016655	LOC112016655	major allergen Pru av 1-like	protein-coding
112039164	LOC112039164	60S ribosomal protein L32-1-like	protein-coding
112001675	LOC112001675	ethylene-responsive transcription factor 4-like	protein-coding
112030122	LOC112030122	non-functional NADPH-dependent codeinone reductase 2-like	pseudo
112024345	LOC112024345	uncharacterized transporter C405.03c-like	protein-coding
112033161	LOC112033161	60S acidic ribosomal protein P3-like	protein-coding
112007353	LOC112007353	beta-amyrin 28-oxidase-like	protein-coding
112004732	LOC112004732	AT-hook motif nuclear-localized protein 17-like	protein-coding
112028032	LOC112028032	60S ribosomal protein L15-like	protein-coding
112006695	LOC112006695	PAN domain-containing protein At5g03700	protein-coding
112004740	LOC112004740	mitochondrial dicarboxylate/tricarboxylate transporter DTC	protein-coding
112035692	LOC112035692	NAC domain-containing protein 2-like	protein-coding
111996787	LOC111996787	40S ribosomal protein SA-like	protein-coding
111996309	LOC111996309	40S ribosomal protein S23	protein-coding
112028354	LOC112028354	40S ribosomal protein S23	protein-coding
111991541	LOC111991541	glutathione S-transferase U25-like	pseudo
112034346	LOC112034346	cytochrome P450 81E8-like	protein-coding
111995168	LOC111995168	60S ribosomal protein L22-2	protein-coding
112031840	LOC112031840	oxalate--CoA ligase-like	protein-coding
112030970	LOC112030970	nascent polypeptide-associated complex subunit alpha-like protein 1	protein-coding
112039529	LOC112039529	40S ribosomal protein S16	protein-coding
112035110	LOC112035110	cysteine-rich repeat secretory protein 38-like	protein-coding
111991081	LOC111991081	uncharacterized LOC111991081	ncRNA
112002236	LOC112002236	40S ribosomal protein S10-2-like	protein-coding
112024202	LOC112024202	40S ribosomal protein S26-3-like	protein-coding
112022552	LOC112022552	nitronate monooxygenase	protein-coding
112018003	LOC112018003	nucleoside diphosphate kinase 1	protein-coding
112007481	LOC112007481	1-aminocyclopropane-1-carboxylate synthase 3-like	protein-coding
112007699	LOC112007699	(+)-neomenthol dehydrogenase-like	protein-coding
112027601	LOC112027601	glycine-rich RNA-binding protein 2, mitochondrial-like	protein-coding
112024706	LOC112024706	leucoanthocyanidin reductase-like	protein-coding
111992824	LOC111992824	uncharacterized LOC111992824	protein-coding
112039735	LOC112039735	elongation factor 1-gamma 2-like	protein-coding
112004135	LOC112004135	uncharacterized LOC112004135	protein-coding
112016123	LOC112016123	beta-D-glucosyl crocetin beta-1,6-glucosyltransferase-like	protein-coding
112005290	LOC112005290	glutathione S-transferase L3-like	protein-coding
112000377	LOC112000377	uncharacterized acetyltransferase At3g50280-like	protein-coding
112012663	LOC112012663	60S ribosomal protein L17-2-like	protein-coding
112030050	LOC112030050	bifunctional 3-dehydroquinate dehydratase/shikimate dehydrogenase, chloroplastic-like	protein-coding
112020834	LOC112020834	L-ascorbate peroxidase, cytosolic-like	protein-coding
112039870	LOC112039870	laccase-14-like	protein-coding
111988698	LOC111988698	40S ribosomal protein S15a-1	protein-coding
112028433	LOC112028433	uncharacterized LOC112028433	ncRNA
112040879	LOC112040879	monooxygenase 2-like	protein-coding
112016129	LOC112016129	phosphoserine aminotransferase 1, chloroplastic-like	protein-coding
112034156	LOC112034156	cationic peroxidase 1-like	pseudo
112015329	LOC112015329	aspartate aminotransferase, cytoplasmic	protein-coding
112023516	LOC112023516	40S ribosomal protein S3-3	protein-coding
112038294	LOC112038294	60S ribosomal protein L12	protein-coding
111987550	LOC111987550	LOB domain-containing protein 16	protein-coding
112005578	LOC112005578	putative methyltransferase DDB_G0268948	protein-coding
112015915	LOC112015915	40S ribosomal protein S24-1	protein-coding
112034347	LOC112034347	cytochrome P450 81E8-like	protein-coding
112002134	LOC112002134	NADPH:quinone oxidoreductase-like	protein-coding
111993885	LOC111993885	uncharacterized LOC111993885	protein-coding
112024756	LOC112024756	40S ribosomal protein S3a-like	protein-coding
112012484	LOC112012484	60S ribosomal protein L18a-like	protein-coding
111996865	LOC111996865	40S ribosomal protein S9-2	protein-coding
111998745	LOC111998745	uncharacterized isomerase BH0283-like	protein-coding
112027116	LOC112027116	auxin-responsive protein IAA17-like	protein-coding
112033118	LOC112033118	uncharacterized LOC112033118	protein-coding
112006009	LOC112006009	major allergen Pru ar 1-like	protein-coding
111987750	LOC111987750	mitochondrial import inner membrane translocase subunit TIM8	protein-coding
112022963	LOC112022963	ferredoxin, root R-B2-like	protein-coding
112033117	LOC112033117	uncharacterized LOC112033117	protein-coding
112000332	LOC112000332	uncharacterized LOC112000332	protein-coding
111984558	LOC111984558	serine carboxypeptidase-like 13	protein-coding
112040514	LOC112040514	60S ribosomal protein L5	protein-coding
111996693	LOC111996693	60S ribosomal protein L11-like	protein-coding
112027284	LOC112027284	60S ribosomal protein L32-1	protein-coding
111994397	LOC111994397	protein transport protein Sec61 subunit beta	protein-coding
111996641	LOC111996641	60S ribosomal protein L11-like	protein-coding
112019413	LOC112019413	pyruvate decarboxylase 1	protein-coding
112013825	LOC112013825	60S ribosomal protein L27-like	protein-coding
111984019	LOC111984019	proline-rich extensin-like protein EPR1	protein-coding
112019340	LOC112019340	40S ribosomal protein S18	protein-coding
112026171	LOC112026171	glutamate decarboxylase-like	protein-coding
111998943	LOC111998943	pyruvate kinase, cytosolic isozyme	protein-coding
112015683	LOC112015683	elongation factor 1-gamma 2-like	protein-coding
112019884	LOC112019884	crocetin glucosyltransferase, chloroplastic-like	protein-coding
112006832	LOC112006832	acidic endochitinase-like	protein-coding
111994232	LOC111994232	kirola-like	protein-coding
111986390	LOC111986390	uncharacterized LOC111986390	protein-coding
112011319	LOC112011319	uncharacterized LOC112011319	protein-coding
111991523	LOC111991523	coatomer subunit beta'-1-like	protein-coding
111998092	LOC111998092	40S ribosomal protein S14-3-like	protein-coding
112012939	LOC112012939	mitochondrial adenine nucleotide transporter ADNT1	protein-coding
111986948	LOC111986948	coatomer subunit beta'-1-like	protein-coding
112034009	LOC112034009	cytochrome b-c1 complex subunit 8	protein-coding
112040268	LOC112040268	40S ribosomal protein S23-like	protein-coding
112010624	LOC112010624	serine carboxypeptidase-like 18	protein-coding
112026092	LOC112026092	7-deoxyloganetin glucosyltransferase-like	protein-coding
111984851	LOC111984851	60S ribosomal protein L19-3-like	protein-coding
112024098	LOC112024098	NADPH-dependent aldo-keto reductase, chloroplastic-like	protein-coding
111990608	LOC111990608	phytosulfokines 3-like	protein-coding
112024538	LOC112024538	uncharacterized LOC112024538	protein-coding
112032254	LOC112032254	probable indole-3-acetic acid-amido synthetase GH3.1	protein-coding
112001882	LOC112001882	phospho-2-dehydro-3-deoxyheptonate aldolase 2, chloroplastic-like	protein-coding
111994890	LOC111994890	cytochrome c	protein-coding
112004844	LOC112004844	40S ribosomal protein SA-like	protein-coding
112005390	LOC112005390	protein transport protein Sec61 subunit beta-like	protein-coding
112031581	LOC112031581	cell wall / vacuolar inhibitor of fructosidase 2-like	protein-coding
111994879	LOC111994879	cytochrome c	protein-coding
112008721	LOC112008721	protein DOWNY MILDEW RESISTANCE 6	protein-coding
112016527	LOC112016527	3-oxo-Delta(4,5)-steroid 5-beta-reductase-like	pseudo
112009723	LOC112009723	purple acid phosphatase-like	protein-coding
112000805	LOC112000805	pescadillo homolog	protein-coding
111998651	LOC111998651	inorganic phosphate transporter 1-4	protein-coding
112038129	LOC112038129	5'-nucleotidase SurE	protein-coding
112016364	LOC112016364	crocetin glucosyltransferase, chloroplastic-like	protein-coding
112004276	LOC112004276	UDP-glycosyltransferase 76F1-like	protein-coding
112026409	LOC112026409	aldose 1-epimerase-like	protein-coding
111988722	LOC111988722	hydroquinone glucosyltransferase-like	protein-coding
111991747	LOC111991747	40S ribosomal protein S16-like	protein-coding
112014153	LOC112014153	uncharacterized LOC112014153	protein-coding
111999064	LOC111999064	uncharacterized LOC111999064	protein-coding
112010769	LOC112010769	60S ribosomal protein L28-2	protein-coding
111992289	LOC111992289	acetyl-CoA acetyltransferase, cytosolic 1	protein-coding
111996705	LOC111996705	uncharacterized LOC111996705	protein-coding
112008530	LOC112008530	60S acidic ribosomal protein P1-like	protein-coding
112009898	LOC112009898	40S ribosomal protein S12	protein-coding
112012545	LOC112012545	UDP-glycosyltransferase 43-like	pseudo
112026682	LOC112026682	ferritin-4, chloroplastic-like	protein-coding
111991593	LOC111991593	glutathione transferase GST 23-like	protein-coding
112024751	LOC112024751	40S ribosomal protein S3a-like	protein-coding
112010757	LOC112010757	hydroquinone glucosyltransferase-like	protein-coding
111997902	LOC111997902	(+)-neomenthol dehydrogenase-like	protein-coding
112023313	LOC112023313	40S ribosomal protein S21-2	protein-coding
112005258	LOC112005258	40S ribosomal protein S3a-like	protein-coding
112012959	LOC112012959	RNA-binding protein pno1-like	protein-coding
112022641	LOC112022641	40S ribosomal protein S15-1-like	pseudo
112008264	LOC112008264	60S acidic ribosomal protein P1-like	protein-coding
112004210	LOC112004210	uncharacterized LOC112004210	protein-coding
112030441	LOC112030441	MLP-like protein 43	protein-coding
111989699	LOC111989699	60S ribosomal protein L26-1-like	protein-coding
112007252	LOC112007252	cytochrome P450 714C2-like	protein-coding
111997181	LOC111997181	alcohol dehydrogenase 1-like	pseudo
112033410	LOC112033410	40S ribosomal protein S20-2-like	protein-coding
112013114	LOC112013114	60S ribosomal protein L5	protein-coding
112031325	LOC112031325	uncharacterized LOC112031325	protein-coding
111986679	LOC111986679	cinnamoyl-CoA reductase 1-like	protein-coding
111994534	LOC111994534	thiamine-repressible mitochondrial transport protein THI74-like	protein-coding
112028751	LOC112028751	D-aminoacyl-tRNA deacylase	protein-coding
112032157	LOC112032157	transcription factor PCL1-like	protein-coding
112004219	LOC112004219	polyadenylate-binding protein RBP47-like	protein-coding
112016741	LOC112016741	hydroquinone glucosyltransferase-like	protein-coding
112016533	LOC112016533	3-oxo-Delta(4,5)-steroid 5-beta-reductase-like	protein-coding
112012112	LOC112012112	dof zinc finger protein DOF5.6	protein-coding
111996615	LOC111996615	arginine decarboxylase-like	protein-coding
111983043	LOC111983043	60S ribosomal protein L35a-3-like	protein-coding
111995849	LOC111995849	60S ribosomal protein L11	protein-coding
112010436	LOC112010436	serine carboxypeptidase-like 18	protein-coding
111995713	LOC111995713	protein ALP1-like	protein-coding
112027899	LOC112027899	peroxisomal (S)-2-hydroxy-acid oxidase GLO4-like	protein-coding
112039641	LOC112039641	uncharacterized LOC112039641	protein-coding
112005997	LOC112005997	60S ribosomal protein L19-1	protein-coding
112000862	LOC112000862	epoxide hydrolase A-like	protein-coding
111998872	LOC111998872	heat shock factor protein HSF24	protein-coding
112025714	LOC112025714	4-coumarate--CoA ligase-like 7	pseudo
111983268	LOC111983268	cysteine-rich receptor-like protein kinase 41	protein-coding
112001486	LOC112001486	gibberellin receptor GID1B-like	protein-coding
112007260	LOC112007260	60S ribosomal protein L10-like	protein-coding
112007317	LOC112007317	60S ribosomal protein L29-1-like	protein-coding
112038899	LOC112038899	serine/threonine-protein kinase D6PKL1	protein-coding
112003698	LOC112003698	2,3-bisphosphoglycerate-independent phosphoglycerate mutase	protein-coding
112017245	LOC112017245	cytochrome P450 81E8-like	protein-coding
112018936	LOC112018936	major allergen Pru av 1-like	protein-coding
112026067	LOC112026067	7-deoxyloganetin glucosyltransferase-like	protein-coding
112034364	LOC112034364	caffeic acid 3-O-methyltransferase-like	protein-coding
111995994	LOC111995994	glutathione S-transferase U8-like	protein-coding
112010041	LOC112010041	1-aminocyclopropane-1-carboxylate oxidase homolog 6-like	pseudo
112005580	LOC112005580	putative methyltransferase DDB_G0268948	protein-coding
112006814	LOC112006814	transcription factor bHLH149-like	protein-coding
112019212	LOC112019212	uncharacterized LOC112019212	protein-coding
111998093	LOC111998093	ubiquitin-60S ribosomal protein L40	protein-coding
112031842	LOC112031842	ubiquitin-NEDD8-like protein RUB2	protein-coding
112039502	LOC112039502	40S ribosomal protein S6-like	protein-coding
112000865	LOC112000865	epoxide hydrolase A-like	protein-coding
112004955	LOC112004955	mitochondrial uncoupling protein 4-like	protein-coding
111991568	LOC111991568	lipid transfer-like protein VAS	protein-coding
112018876	LOC112018876	60S ribosomal protein L27-like	protein-coding
111986706	LOC111986706	36.4 kDa proline-rich protein	protein-coding
112026337	LOC112026337	40S ribosomal protein S6	protein-coding
112004789	LOC112004789	potassium transporter 5-like	protein-coding
112008943	LOC112008943	pentatricopeptide repeat-containing protein At4g32450, mitochondrial-like	pseudo
112038358	LOC112038358	cationic peroxidase 1-like	protein-coding
112034350	LOC112034350	cytochrome P450 81E8-like	protein-coding
112019462	LOC112019462	60S ribosomal protein L36-2-like	protein-coding
112026136	LOC112026136	12-oxophytodienoate reductase 2-like	protein-coding
111987934	LOC111987934	nascent polypeptide-associated complex subunit alpha-like protein 1	protein-coding
112026429	LOC112026429	60S ribosomal protein L36-2-like	protein-coding
112004215	LOC112004215	uncharacterized LOC112004215	protein-coding
112021034	LOC112021034	40S ribosomal protein S29	protein-coding
112028189	LOC112028189	2-hydroxyacyl-CoA lyase	protein-coding
112030809	LOC112030809	uncharacterized LOC112030809	protein-coding
112027656	LOC112027656	glucan endo-1,3-beta-glucosidase	protein-coding
112004400	LOC112004400	uncharacterized LOC112004400	ncRNA
112033487	LOC112033487	60S ribosomal protein L13a-4	protein-coding
112005136	LOC112005136	ubiquitin-60S ribosomal protein L40-2	protein-coding
111987416	LOC111987416	uncharacterized N-acetyltransferase p20-like	protein-coding
112018937	LOC112018937	major allergen Pru av 1-like	protein-coding
112001019	LOC112001019	10 kDa chaperonin-like	protein-coding
112033430	LOC112033430	60S ribosomal protein L38-like	protein-coding
111999482	LOC111999482	probable glutathione S-transferase	protein-coding
112034469	LOC112034469	endoribonuclease YBEY, chloroplastic-like	protein-coding
112017548	LOC112017548	uncharacterized LOC112017548	ncRNA
111986770	LOC111986770	60S ribosomal protein L13a-4	protein-coding
112008862	LOC112008862	probable indole-3-acetic acid-amido synthetase GH3.1	protein-coding
111985943	LOC111985943	solute carrier family 35 member F2	protein-coding
111985069	LOC111985069	40S ribosomal protein S26-1	protein-coding
112004213	LOC112004213	cucumber peeling cupredoxin-like	protein-coding
112034402	LOC112034402	alcohol dehydrogenase-like	protein-coding
112024416	LOC112024416	uncharacterized LOC112024416	protein-coding
112035115	LOC112035115	cysteine-rich repeat secretory protein 38-like	pseudo
112003986	LOC112003986	stigma-specific STIG1-like protein 3	protein-coding
111998450	LOC111998450	40S ribosomal protein S3a-like	protein-coding
111998449	LOC111998449	40S ribosomal protein S3a	protein-coding
111991706	LOC111991706	40S ribosomal protein S7-1-like	pseudo
112032842	LOC112032842	high affinity sulfate transporter 2-like	protein-coding
111996905	LOC111996905	profilin-4	protein-coding
112030774	LOC112030774	guanine nucleotide-binding protein subunit beta-like protein	protein-coding
112025527	LOC112025527	zeatin O-glucosyltransferase-like	protein-coding
111987360	LOC111987360	7-deoxyloganetin glucosyltransferase-like	protein-coding
111987039	LOC111987039	cysteine-rich repeat secretory protein 55-like	protein-coding
112025471	LOC112025471	40S ribosomal protein S14-3-like	protein-coding
112002281	LOC112002281	1-aminocyclopropane-1-carboxylate oxidase homolog 1-like	protein-coding
111993071	LOC111993071	isocitrate dehydrogenase NADP	protein-coding
111994075	LOC111994075	40S ribosomal protein S28	protein-coding
112022928	LOC112022928	uncharacterized LOC112022928	ncRNA
112034444	LOC112034444	stigma-specific STIG1-like protein 3	protein-coding
112015305	LOC112015305	mitochondrial import receptor subunit TOM6 homolog	protein-coding
112025822	LOC112025822	cytochrome b-c1 complex subunit 8-like	protein-coding
112009241	LOC112009241	salutaridine reductase-like	protein-coding
112035426	LOC112035426	60S ribosomal protein L27a-3-like	protein-coding
112039874	LOC112039874	60S ribosomal protein L13a-4-like	pseudo
112021160	LOC112021160	7-deoxyloganetin glucosyltransferase-like	protein-coding
112040125	LOC112040125	uncharacterized LOC112040125	ncRNA
112019243	LOC112019243	dolichyl-diphosphooligosaccharide--protein glycosyltransferase subunit 2	protein-coding
111994460	LOC111994460	40S ribosomal protein S27-2-like	protein-coding
112028146	LOC112028146	peroxidase 10-like	protein-coding
112003043	LOC112003043	NDR1/HIN1-like protein 10	protein-coding
112016526	LOC112016526	3-oxo-Delta(4,5)-steroid 5-beta-reductase-like	protein-coding
111988058	LOC111988058	uncharacterized LOC111988058	ncRNA
112023278	LOC112023278	40S ribosomal protein S27-2-like	protein-coding
112021358	LOC112021358	60S ribosomal protein L14-2	protein-coding
111992988	LOC111992988	60S ribosomal protein L36-2-like	protein-coding
112009018	LOC112009018	mitochondrial phosphate carrier protein 3, mitochondrial-like	protein-coding
112024930	LOC112024930	transcription initiation factor TFIID subunit 7-like	protein-coding
111991524	LOC111991524	repetitive proline-rich cell wall protein 2-like	protein-coding
112013635	LOC112013635	repetitive proline-rich cell wall protein 2-like	protein-coding
112031599	LOC112031599	60S ribosomal protein L34-like	protein-coding
111983968	LOC111983968	STOREKEEPER protein-like	protein-coding
112032135	LOC112032135	60S ribosomal protein L7-4-like	protein-coding
112036130	LOC112036130	polyubiquitin-like	protein-coding
111993142	LOC111993142	elongation factor 1-alpha-like	protein-coding
112022959	LOC112022959	60S ribosomal protein L10a-like	protein-coding
111998452	LOC111998452	40S ribosomal protein S3a-like	protein-coding
111994554	LOC111994554	probable pyridoxal 5'-phosphate synthase subunit PDX1	protein-coding
112025304	LOC112025304	adenosine kinase 2-like	protein-coding
112007287	LOC112007287	acetate/butyrate--CoA ligase AAE7, peroxisomal	protein-coding
112029902	LOC112029902	salutaridine reductase-like	protein-coding
112030991	LOC112030991	elongation factor 1-alpha-like	protein-coding
112032563	LOC112032563	60S ribosomal protein L27	protein-coding
112013918	LOC112013918	60S ribosomal protein L3-1	protein-coding
112032562	LOC112032562	60S ribosomal protein L27	protein-coding
112031515	LOC112031515	elongation factor Tu, mitochondrial	protein-coding
111989427	LOC111989427	polyubiquitin	protein-coding
111986057	LOC111986057	serine carboxypeptidase-like 40	protein-coding
111985237	LOC111985237	squalene monooxygenase-like	protein-coding
112023030	LOC112023030	two-component response regulator-like APRR1	protein-coding
112035841	LOC112035841	uncharacterized LOC112035841	ncRNA
112022643	LOC112022643	40S ribosomal protein S15-1-like	pseudo
112040089	LOC112040089	glutathione reductase, chloroplastic	protein-coding
112037343	LOC112037343	isocitrate dehydrogenase NADP-like	protein-coding
112036676	LOC112036676	beta-D-glucosyl crocetin beta-1,6-glucosyltransferase-like	pseudo
112007575	LOC112007575	cinnamoyl-CoA reductase-like SNL6	protein-coding
112008495	LOC112008495	uclacyanin-3	protein-coding
111991632	LOC111991632	putative methyltransferase DDB_G0268948	protein-coding
112016639	LOC112016639	ribosome-recycling factor	protein-coding
112039377	LOC112039377	UDP-glycosyltransferase 74E1-like	pseudo
111986841	LOC111986841	protein disulfide-isomerase-like	protein-coding
112023365	LOC112023365	mitochondrial outer membrane protein porin of 34 kDa	protein-coding
112002335	LOC112002335	protein DETOXIFICATION 16-like	protein-coding
112036699	LOC112036699	GDSL esterase/lipase At1g31550-like	protein-coding
112004852	LOC112004852	60S ribosomal protein L6-1-like	protein-coding
112020942	LOC112020942	cytochrome P450 94A2-like	protein-coding
111992185	LOC111992185	malate dehydrogenase, mitochondrial	protein-coding
112008493	LOC112008493	transcription factor JUNGBRUNNEN 1-like	protein-coding
112027198	LOC112027198	serine carboxypeptidase-like 18	protein-coding
111996733	LOC111996733	60S acidic ribosomal protein P2B-like	protein-coding
112007546	LOC112007546	putative disease resistance protein RGA3	protein-coding
112026667	LOC112026667	40S ribosomal protein S4-1-like	protein-coding
112018292	LOC112018292	L-ascorbate oxidase homolog	protein-coding
111984081	LOC111984081	UDP-glycosyltransferase 76F1-like	protein-coding
112027908	LOC112027908	protein SRG1-like	protein-coding
112032843	LOC112032843	sulfate transporter 1.3-like	protein-coding
112012521	LOC112012521	60S ribosomal protein L24-like	protein-coding
112015338	LOC112015338	MLP-like protein 43	protein-coding
112008593	LOC112008593	protein JINGUBANG	protein-coding
112009852	LOC112009852	40S ribosomal protein S14-3	protein-coding
111989348	LOC111989348	uncharacterized LOC111989348	ncRNA
112032878	LOC112032878	uncharacterized LOC112032878	ncRNA
112024595	LOC112024595	acyl carrier protein 1, mitochondrial	protein-coding
111994527	LOC111994527	peptidyl-prolyl cis-trans isomerase CYP20-1	protein-coding
112002298	LOC112002298	1-aminocyclopropane-1-carboxylate oxidase homolog 6-like	protein-coding
111987813	LOC111987813	40S ribosomal protein S4-1	protein-coding
111994764	LOC111994764	40S ribosomal protein S4-1	protein-coding
111984101	LOC111984101	40S ribosomal protein S4-3-like	protein-coding
112019023	LOC112019023	protein PLANT CADMIUM RESISTANCE 8	protein-coding
111997183	LOC111997183	alcohol dehydrogenase 1-like	protein-coding
112005106	LOC112005106	60S ribosomal protein L10	protein-coding
112039995	LOC112039995	uncharacterized LOC112039995	protein-coding
112033147	LOC112033147	probable WRKY transcription factor 31	protein-coding
111993338	LOC111993338	60S ribosomal protein L17-2-like	protein-coding
112022593	LOC112022593	40S ribosomal protein S8-like	protein-coding
112028786	LOC112028786	60S ribosomal protein L18-2-like	protein-coding
112011643	LOC112011643	60S ribosomal protein L17-2	protein-coding
112009388	LOC112009388	serine carboxypeptidase-like 45	protein-coding
112038967	LOC112038967	elongation factor 1-alpha-like	protein-coding
112031531	LOC112031531	60S ribosomal protein L14-1	protein-coding
112011701	LOC112011701	glutaredoxin-C9-like	protein-coding
111992008	LOC111992008	auxin-induced in root cultures protein 12-like	protein-coding
112030860	LOC112030860	polyubiquitin 11-like	protein-coding
112027105	LOC112027105	40S ribosomal protein S25-like	protein-coding
112039381	LOC112039381	UDP-glycosyltransferase 74E1-like	protein-coding
112020620	LOC112020620	transcription termination factor MTERF15, mitochondrial-like	protein-coding
111994525	LOC111994525	uncharacterized LOC111994525	pseudo
112032128	LOC112032128	T-complex protein 1 subunit gamma-like	protein-coding
112015496	LOC112015496	hexose carrier protein HEX6-like	protein-coding
111984115	LOC111984115	60S ribosomal protein L38-like	protein-coding
111997157	LOC111997157	60S ribosomal protein L24	protein-coding
112030822	LOC112030822	protein LURP-one-related 5-like	protein-coding
112020595	LOC112020595	uncharacterized LOC112020595	protein-coding
112010443	LOC112010443	caffeic acid 3-O-methyltransferase 1-like	protein-coding
112028738	LOC112028738	nicotianamine synthase-like	protein-coding
111997607	LOC111997607	transcription factor bHLH93-like	protein-coding
112039365	LOC112039365	glutathione S-transferase U9-like	protein-coding
111988927	LOC111988927	uncharacterized LOC111988927	protein-coding
111986809	LOC111986809	feruloyl CoA ortho-hydroxylase 1-like	protein-coding
112036588	LOC112036588	non-specific lipid-transfer protein 3-like	protein-coding
112039114	LOC112039114	ABC transporter C family member 14-like	protein-coding
112001958	LOC112001958	dirigent protein 19-like	protein-coding
112026329	LOC112026329	40S ribosomal protein S6-like	protein-coding
112019356	LOC112019356	UDP-glycosyltransferase 74E2-like	protein-coding
111988156	LOC111988156	EIN3-binding F-box protein 1-like	protein-coding
112033102	LOC112033102	40S ribosomal protein S29-like	protein-coding
112007577	LOC112007577	probable sarcosine oxidase	protein-coding
112007585	LOC112007585	probable sarcosine oxidase	protein-coding
112006554	LOC112006554	ATP phosphoribosyltransferase 2, chloroplastic-like	protein-coding
112033617	LOC112033617	ubiquitin-40S ribosomal protein S27a	protein-coding
112009724	LOC112009724	uncharacterized LOC112009724	protein-coding
112015499	LOC112015499	hexose carrier protein HEX6-like	protein-coding
112003126	LOC112003126	60S ribosomal protein L31-like	protein-coding
112041122	LOC112041122	40S ribosomal protein S23	protein-coding
112041121	LOC112041121	40S ribosomal protein S23	protein-coding
112022159	LOC112022159	protein KRTCAP2 homolog	protein-coding
112025504	LOC112025504	thaumatin-like protein 1b	protein-coding
111985100	LOC111985100	superoxide dismutase Mn, mitochondrial-like	protein-coding
112039849	LOC112039849	60S ribosomal protein L38	protein-coding
112002292	LOC112002292	7-deoxyloganetin glucosyltransferase-like	pseudo
112034523	LOC112034523	60S ribosomal protein L22-2-like	protein-coding
112009261	LOC112009261	salutaridine reductase-like	protein-coding
111987387	LOC111987387	pyruvate kinase, cytosolic isozyme	protein-coding
112023958	LOC112023958	60S ribosomal protein L21-1	protein-coding
111991595	LOC111991595	glutathione S-transferase U19-like	protein-coding
112002968	LOC112002968	uncharacterized protein At4g22758	protein-coding
112004043	LOC112004043	cytochrome P450 CYP73A100-like	protein-coding
112022200	LOC112022200	low-temperature-induced cysteine proteinase-like	protein-coding
112017651	LOC112017651	dirigent protein 19-like	protein-coding
112013244	LOC112013244	probable aminotransferase TAT2	protein-coding
111996133	LOC111996133	cytochrome P450 CYP73A100-like	protein-coding
112015364	LOC112015364	pyruvate kinase, cytosolic isozyme	protein-coding
112004139	LOC112004139	uncharacterized LOC112004139	protein-coding
112004795	LOC112004795	uncharacterized LOC112004795	protein-coding
112016363	LOC112016363	crocetin glucosyltransferase, chloroplastic-like	protein-coding
112002966	LOC112002966	histone deacetylase HDT1-like	protein-coding
111989132	LOC111989132	anthocyanidin reductase ((2S)-flavan-3-ol-forming)	protein-coding
111999443	LOC111999443	auxin-induced in root cultures protein 12-like	protein-coding
112027942	LOC112027942	40S ribosomal protein S2-3-like	protein-coding
112031574	LOC112031574	alcohol dehydrogenase 1-like	pseudo
112008620	LOC112008620	40S ribosomal protein S4-1-like	protein-coding
111985507	LOC111985507	uncharacterized LOC111985507	protein-coding
111987391	LOC111987391	dihydrolipoyllysine-residue succinyltransferase component of 2-oxoglutarate dehydrogenase complex 2, mitochondrial-like	protein-coding
111994394	LOC111994394	40S ribosomal protein S4-1-like	protein-coding
112027897	LOC112027897	peroxisomal (S)-2-hydroxy-acid oxidase GLO4-like	protein-coding
111993074	LOC111993074	blue-light photoreceptor PHR2	protein-coding
111994058	LOC111994058	40S ribosomal protein S5	protein-coding
111984702	LOC111984702	60S ribosomal protein L9	protein-coding
112024484	LOC112024484	peptidyl-prolyl cis-trans isomerase FKBP15-1	protein-coding
112018242	LOC112018242	AP2-like ethylene-responsive transcription factor AIL6	protein-coding
112009322	LOC112009322	BOI-related E3 ubiquitin-protein ligase 1	protein-coding
112019357	LOC112019357	UDP-glycosyltransferase 74E2-like	protein-coding
111996136	LOC111996136	UDP-glycosyltransferase 83A1-like	protein-coding
112022356	LOC112022356	dihydrolipoyl dehydrogenase 1, mitochondrial	protein-coding
112035319	LOC112035319	hydroquinone glucosyltransferase-like	protein-coding
112016936	LOC112016936	auxin-responsive protein SAUR32-like	protein-coding
112020836	LOC112020836	60S ribosomal protein L38	protein-coding
111986286	LOC111986286	glucan endo-1,3-beta-glucosidase, basic vacuolar isoform-like	protein-coding
112024772	LOC112024772	14 kDa proline-rich protein DC2.15-like	protein-coding
111997525	LOC111997525	endo-1,3;1,4-beta-D-glucanase-like	protein-coding
112029433	LOC112029433	endoglucanase 1-like	protein-coding
111998346	LOC111998346	60S ribosomal protein L3-2-like	protein-coding
111988572	LOC111988572	siroheme synthase	protein-coding
112036003	LOC112036003	14-3-3 protein 9-like	protein-coding
111988456	LOC111988456	auxin-responsive protein IAA20-like	protein-coding
111991494	LOC111991494	cytochrome c oxidase copper chaperone 1-like	protein-coding
111993977	LOC111993977	ubiquitin-60S ribosomal protein L40-2-like	protein-coding
112028460	LOC112028460	cytochrome c	protein-coding
111990414	LOC111990414	thaumatin-like protein 1b	protein-coding
112026528	LOC112026528	peptidyl-prolyl cis-trans isomerase FKBP53	protein-coding
112026477	LOC112026477	sulfoquinovosidase-like	protein-coding
112001794	LOC112001794	alanine aminotransferase 2-like	protein-coding
111997351	LOC111997351	1-aminocyclopropane-1-carboxylate oxidase 1	protein-coding
111995853	LOC111995853	60S ribosomal protein L21-2	protein-coding
112001025	LOC112001025	squalene synthase-like	protein-coding
112013872	LOC112013872	probable glutathione S-transferase	pseudo
112032288	LOC112032288	feruloyl CoA ortho-hydroxylase 1-like	protein-coding
111988317	LOC111988317	laccase-14-like	protein-coding
111987552	LOC111987552	uncharacterized LOC111987552	protein-coding
112024336	LOC112024336	putative laccase-9	pseudo
111987027	LOC111987027	ras-related protein RABA5b	protein-coding
112015693	LOC112015693	elongation factor 1-gamma 2-like	pseudo
112030009	LOC112030009	tRNA-dihydrouridine(16/17) synthase NAD(P)(+)	protein-coding
112022281	LOC112022281	homeobox-leucine zipper protein HOX3-like	protein-coding
112027495	LOC112027495	uncharacterized LOC112027495	ncRNA
111991910	LOC111991910	cysteine-rich repeat secretory protein 38-like	protein-coding
112010559	LOC112010559	extensin-2-like	protein-coding
111988885	LOC111988885	hydroxyproline O-arabinosyltransferase 3-like	protein-coding
112004820	LOC112004820	uncharacterized LOC112004820	protein-coding
111990404	LOC111990404	tryptophan aminotransferase-related protein 2	protein-coding
112032158	LOC112032158	gibberellin-regulated protein 14-like	protein-coding
112020599	LOC112020599	crocetin glucosyltransferase, chloroplastic-like	protein-coding
112017657	LOC112017657	pectin acetylesterase 10-like	protein-coding
112002238	LOC112002238	succinate--CoA ligase ADP-forming subunit alpha, mitochondrial	protein-coding
111999144	LOC111999144	ubiquitin-40S ribosomal protein S27a	protein-coding
112004115	LOC112004115	uncharacterized LOC112004115	protein-coding
112024680	LOC112024680	60S ribosomal protein L9	protein-coding
111990245	LOC111990245	UDP-glycosyltransferase 88A1-like	protein-coding
112000103	LOC112000103	peroxidase 16-like	protein-coding
112022598	LOC112022598	polygalacturonase-1 non-catalytic subunit beta-like	protein-coding
111989498	LOC111989498	carboxylesterase 1-like	protein-coding
111984080	LOC111984080	UDP-glycosyltransferase 76F1-like	protein-coding
112040656	LOC112040656	uncharacterized LOC112040656	protein-coding
111984348	LOC111984348	beta-amyrin synthase	protein-coding
112029987	LOC112029987	diacylglycerol kinase theta	protein-coding
112008283	LOC112008283	transcription factor BEE 1-like	protein-coding
111987593	LOC111987593	uncharacterized LOC111987593	protein-coding
112035022	LOC112035022	uncharacterized LOC112035022	protein-coding
112039690	LOC112039690	enolase 1	protein-coding
112015413	LOC112015413	3-oxoacyl-acyl-carrier-protein reductase FabG-like	protein-coding
112022715	LOC112022715	aquaporin PIP2-2-like	pseudo
111998313	LOC111998313	protein PIN-LIKES 3-like	protein-coding
111997057	LOC111997057	glutathione transferase GST 23-like	protein-coding
112017981	LOC112017981	tRNA-dihydrouridine(20/20a) synthase-like	protein-coding
112027005	LOC112027005	ATP phosphoribosyltransferase 2, chloroplastic-like	protein-coding
112031600	LOC112031600	glutathione S-transferase U10-like	protein-coding
112038849	LOC112038849	60S ribosomal protein L27-like	pseudo
111989487	LOC111989487	protein MOTHER of FT and TFL1-like	protein-coding
111987409	LOC111987409	uncharacterized LOC111987409	protein-coding
112021163	LOC112021163	uncharacterized LOC112021163	protein-coding
111994201	LOC111994201	probable xyloglucan endotransglucosylase/hydrolase protein 32	protein-coding
112003486	LOC112003486	probable prolyl 4-hydroxylase 9	protein-coding
112027935	LOC112027935	calmodulin-7	protein-coding
112033552	LOC112033552	ATPase 10, plasma membrane-type-like	protein-coding
111983203	LOC111983203	E3 ubiquitin-protein ligase RHA1B	protein-coding
112022594	LOC112022594	40S ribosomal protein S8-like	protein-coding
111988360	LOC111988360	60S ribosomal protein L13-1	protein-coding
112033422	LOC112033422	40S ribosomal protein S20-1-like	protein-coding
112035993	LOC112035993	transcription factor MYB108	protein-coding
111997409	LOC111997409	serine carboxypeptidase-like 13	protein-coding
112035773	LOC112035773	putative ripening-related protein 1	protein-coding
112005058	LOC112005058	uncharacterized LOC112005058	protein-coding
112031611	LOC112031611	60S ribosomal protein L34	protein-coding
111991633	LOC111991633	putative methyltransferase DDB_G0268948	protein-coding
112032424	LOC112032424	serine carboxypeptidase-like 40	protein-coding
112017835	LOC112017835	40S ribosomal protein S18-like	protein-coding
111997464	LOC111997464	uncharacterized LOC111997464	pseudo
112005204	LOC112005204	cytochrome b5	protein-coding
112022513	LOC112022513	two-component response regulator-like APRR5	protein-coding
111997945	LOC111997945	H/ACA ribonucleoprotein complex subunit 2-like protein	protein-coding
112027991	LOC112027991	uncharacterized LOC112027991	protein-coding
112013155	LOC112013155	probable ribosome biogenesis protein RLP24	protein-coding
111997435	LOC111997435	crocetin glucosyltransferase, chloroplastic-like	pseudo
112023612	LOC112023612	peroxisomal (S)-2-hydroxy-acid oxidase GLO4-like	protein-coding
111984103	LOC111984103	probable ribosome biogenesis protein RLP24	protein-coding
112038365	LOC112038365	CASP-like protein 4D1	protein-coding
112015230	LOC112015230	DEAD-box ATP-dependent RNA helicase 1-like	protein-coding
112003372	LOC112003372	putative H/ACA ribonucleoprotein complex subunit 1-like protein 1	protein-coding
112034526	LOC112034526	mitochondrial import receptor subunit TOM7-1-like	protein-coding
111988287	LOC111988287	40S ribosomal protein S8-2	protein-coding
111989387	LOC111989387	uncharacterized LOC111989387	ncRNA
111988597	LOC111988597	serine carboxypeptidase-like 40	protein-coding
111984995	LOC111984995	uncharacterized LOC111984995	protein-coding
112020954	LOC112020954	CASP-like protein 4D1	protein-coding
112023224	LOC112023224	cytokinin dehydrogenase 3-like	protein-coding
112038387	LOC112038387	40S ribosomal protein S30	protein-coding
112004744	LOC112004744	uncharacterized LOC112004744	protein-coding
111992187	LOC111992187	abscisate beta-glucosyltransferase-like	protein-coding
112017682	LOC112017682	mitochondrial import receptor subunit TOM5 homolog	protein-coding
111996147	LOC111996147	ethylene-responsive transcription factor 1B	protein-coding
112010407	LOC112010407	serine carboxypeptidase-like 7	protein-coding
111983380	LOC111983380	geraniol 8-hydroxylase-like	pseudo
112004518	LOC112004518	UDP-glycosyltransferase 89B2-like	protein-coding
112025064	LOC112025064	uncharacterized LOC112025064	protein-coding
111984746	LOC111984746	60S acidic ribosomal protein P0	protein-coding
112013994	LOC112013994	eukaryotic translation initiation factor 4E-1-like	protein-coding
112028407	LOC112028407	uncharacterized protein At4g06744-like	protein-coding
112004414	LOC112004414	RING-H2 finger protein ATL63	protein-coding
112027112	LOC112027112	auxin-induced protein IAA6	protein-coding
111989162	LOC111989162	pentatricopeptide repeat-containing protein At3g13160, mitochondrial-like	protein-coding
111988144	LOC111988144	L-lactate dehydrogenase B-like	protein-coding
112013784	LOC112013784	60S ribosomal protein L27-like	pseudo
112006220	LOC112006220	probable mannitol dehydrogenase	protein-coding
112000354	LOC112000354	TMV resistance protein N-like	protein-coding
111988692	LOC111988692	pyruvate kinase 1, cytosolic-like	protein-coding
112038559	LOC112038559	uncharacterized LOC112038559	ncRNA
112037997	LOC112037997	HIPL1 protein	protein-coding
112010620	LOC112010620	60S ribosomal protein L35-like	protein-coding
111988383	LOC111988383	UDP-glycosyltransferase 88A1-like	pseudo
112023780	LOC112023780	uncharacterized LOC112023780	protein-coding
112008939	LOC112008939	caffeic acid 3-O-methyltransferase-like	protein-coding
112023887	LOC112023887	endoglucanase 6	protein-coding
112014554	LOC112014554	probable galactinol--sucrose galactosyltransferase 5	protein-coding
112021098	LOC112021098	extensin-like	protein-coding
111988381	LOC111988381	UDP-glycosyltransferase 88A1-like	protein-coding
112001930	LOC112001930	protein PIN-LIKES 7-like	protein-coding
112025915	LOC112025915	probable ribosome biogenesis protein RLP24	protein-coding
112028547	LOC112028547	major allergen Pru ar 1-like	protein-coding
111988060	LOC111988060	uncharacterized LOC111988060	ncRNA
112015742	LOC112015742	cysteine-rich repeat secretory protein 38-like	protein-coding
112019336	LOC112019336	40S ribosomal protein S17-like	protein-coding
111993321	LOC111993321	phosphoethanolamine N-methyltransferase 1-like	protein-coding
111988128	LOC111988128	14 kDa proline-rich protein DC2.15-like	protein-coding
112034536	LOC112034536	60S ribosomal protein L6-like	protein-coding
112025486	LOC112025486	10 kDa chaperonin-like	protein-coding
112016921	LOC112016921	GDSL esterase/lipase At1g28580-like	protein-coding
112002893	LOC112002893	lysine-specific demethylase JMJ30	protein-coding
112023983	LOC112023983	thioredoxin 1-like	protein-coding
112032281	LOC112032281	feruloyl CoA ortho-hydroxylase 1-like	pseudo
112030103	LOC112030103	protein PMR5-like	protein-coding
112015185	LOC112015185	gallate 1-beta-glucosyltransferase	protein-coding
112024771	LOC112024771	14 kDa proline-rich protein DC2.15-like	protein-coding
112040767	LOC112040767	protein SRG1-like	protein-coding
111992688	LOC111992688	60S ribosomal protein L15-1-like	pseudo
112010058	LOC112010058	uncharacterized LOC112010058	protein-coding
112039823	LOC112039823	cucumber peeling cupredoxin	protein-coding
112007547	LOC112007547	ATP phosphoribosyltransferase 2, chloroplastic-like	protein-coding
111997261	LOC111997261	ATP synthase subunit epsilon, mitochondrial	protein-coding
112032540	LOC112032540	auxin-responsive protein IAA9	protein-coding
112007885	LOC112007885	UDP-glycosyltransferase 89B1-like	protein-coding
112008230	LOC112008230	tRNA-dihydrouridine(20/20a) synthase-like	protein-coding
112027829	LOC112027829	tRNA-dihydrouridine(20/20a) synthase-like	protein-coding
112040671	LOC112040671	aspartate-semialdehyde dehydrogenase-like	protein-coding
112038651	LOC112038651	protein BOLA4, chloroplastic/mitochondrial-like	protein-coding
111988574	LOC111988574	histidinol-phosphate aminotransferase, chloroplastic-like	protein-coding
111993090	LOC111993090	probable small nuclear ribonucleoprotein F	protein-coding
112022604	LOC112022604	pre-mRNA-processing factor 17-like	protein-coding
112032320	LOC112032320	12-oxophytodienoate reductase 2-like	protein-coding
112021194	LOC112021194	protein IWS1 homolog A	protein-coding
112027252	LOC112027252	plasma membrane ATPase 4-like	protein-coding
111992506	LOC111992506	ADP-ribosylation factor 1	protein-coding
111992202	LOC111992202	60S ribosomal protein L23	protein-coding
112005979	LOC112005979	major allergen Pru ar 1-like	protein-coding
112032336	LOC112032336	12-oxophytodienoate reductase 2-like	protein-coding
112017239	LOC112017239	cytochrome P450 81D1-like	protein-coding
112028052	LOC112028052	cytochrome P450 CYP736A12-like	protein-coding
111995647	LOC111995647	mitochondrial import inner membrane translocase subunit Tim9	protein-coding
112039444	LOC112039444	probable mediator of RNA polymerase II transcription subunit 36b	protein-coding
112013995	LOC112013995	60S ribosomal protein L13-1-like	protein-coding
112039553	LOC112039553	microsomal glutathione S-transferase 3-like	protein-coding
111985033	LOC111985033	40S ribosomal protein S27-2	protein-coding
112037446	LOC112037446	uncharacterized LOC112037446	protein-coding
111999207	LOC111999207	endochitinase EP3-like	protein-coding
112028748	LOC112028748	RNA pseudouridine synthase 1	protein-coding
112024691	LOC112024691	60S ribosomal protein L9-like	protein-coding
111999489	LOC111999489	probable glutathione S-transferase	protein-coding
112014116	LOC112014116	60S ribosomal protein L13a-4-like	pseudo
112026246	LOC112026246	lysM domain-containing GPI-anchored protein 2	protein-coding
112026433	LOC112026433	uncharacterized acetyltransferase At3g50280-like	protein-coding
111997192	LOC111997192	1-aminocyclopropane-1-carboxylate synthase-like	protein-coding
112032039	LOC112032039	60S ribosomal protein L15-1	protein-coding
111990872	LOC111990872	E3 ubiquitin-protein ligase ATL6-like	protein-coding
112029467	LOC112029467	protein DMR6-LIKE OXYGENASE 1-like	protein-coding
112015701	LOC112015701	probable carboxylesterase 5	protein-coding
111986606	LOC111986606	auxin-responsive protein IAA29	protein-coding
112026612	LOC112026612	UDP-glycosyltransferase 89B1-like	pseudo
112022587	LOC112022587	polygalacturonase-1 non-catalytic subunit beta-like	protein-coding
112040880	LOC112040880	monooxygenase 2-like	protein-coding
112018401	LOC112018401	phosphoglycerate kinase, cytosolic	protein-coding
112020558	LOC112020558	sodium/hydrogen exchanger 2-like	protein-coding
111996170	LOC111996170	GDSL esterase/lipase At3g26430-like	protein-coding
112031015	LOC112031015	acyl-lipid omega-3 desaturase (cytochrome b5), endoplasmic reticulum-like	protein-coding
111987146	LOC111987146	galactomannan galactosyltransferase 1-like	protein-coding
112007402	LOC112007402	G-type lectin S-receptor-like serine/threonine-protein kinase At4g27290	protein-coding
111997253	LOC111997253	D-3-phosphoglycerate dehydrogenase 2, chloroplastic-like	protein-coding
111984815	LOC111984815	acyl carrier protein 2, mitochondrial	protein-coding
112030041	LOC112030041	probable cinnamyl alcohol dehydrogenase	protein-coding
112003572	LOC112003572	auxin-induced protein 15A-like	protein-coding
112015607	LOC112015607	allene oxide cyclase, chloroplastic-like	protein-coding
111985890	LOC111985890	cytochrome P450 CYP736A12-like	pseudo
112025328	LOC112025328	U-box domain-containing protein 33-like	protein-coding
112038648	LOC112038648	40S ribosomal protein S3-2	protein-coding
111997486	LOC111997486	eukaryotic initiation factor 4A-11-like	protein-coding
112030425	LOC112030425	uncharacterized LOC112030425	protein-coding
112037375	LOC112037375	pro-hevein-like	protein-coding
112019939	LOC112019939	DNA repair protein RAD51 homolog	protein-coding
112025028	LOC112025028	50S ribosomal protein L23-like	protein-coding
112016228	LOC112016228	60S ribosomal protein L18-3	protein-coding
112003033	LOC112003033	NDR1/HIN1-like protein 3	pseudo
111986933	LOC111986933	VQ motif-containing protein 33-like	protein-coding
112004374	LOC112004374	amino acid permease 6-like	protein-coding
111990149	LOC111990149	heat stress transcription factor B-2a-like	protein-coding
112027092	LOC112027092	cytochrome c oxidase subunit 5b-1, mitochondrial-like	protein-coding
112017238	LOC112017238	cytochrome P450 81E8-like	protein-coding
112000464	LOC112000464	UDP-glycosyltransferase 87A1-like	protein-coding
111998637	LOC111998637	cysteine-rich and transmembrane domain-containing protein WIH2-like	protein-coding
112031076	LOC112031076	40S ribosomal protein S19-3-like	protein-coding
111999690	LOC111999690	eukaryotic translation initiation factor 3 subunit E	protein-coding
111999206	LOC111999206	endochitinase EP3-like	protein-coding
112011641	LOC112011641	UDP-glycosyltransferase 89B1-like	protein-coding
111992525	LOC111992525	prohibitin-3, mitochondrial-like	protein-coding
111995717	LOC111995717	ATP synthase subunit beta, mitochondrial-like	protein-coding
111990604	LOC111990604	uncharacterized LOC111990604	protein-coding
112002932	LOC112002932	60S ribosomal protein L37a-1-like	protein-coding
112039407	LOC112039407	uncharacterized LOC112039407	protein-coding
112034149	LOC112034149	calreticulin-like	protein-coding
112023452	LOC112023452	50S ribosomal protein L23-like	protein-coding
112026613	LOC112026613	UDP-glycosyltransferase 89B1-like	protein-coding
111991645	LOC111991645	60S ribosomal protein L12-like	protein-coding
112000247	LOC112000247	low-temperature-induced cysteine proteinase-like	protein-coding
112019780	LOC112019780	guanylate kinase 3, chloroplastic	protein-coding
112022350	LOC112022350	stress-response A/B barrel domain-containing protein HS1	protein-coding
112027438	LOC112027438	arogenate dehydratase/prephenate dehydratase 2, chloroplastic-like	protein-coding
112010725	LOC112010725	60S ribosomal protein L15-1	protein-coding
112009239	LOC112009239	peroxidase 24-like	protein-coding
112036539	LOC112036539	60S ribosomal protein L12	protein-coding
111988838	LOC111988838	probable sulfate transporter 3.5	protein-coding
112030364	LOC112030364	pyrrolidone-carboxylate peptidase-like	protein-coding
111998621	LOC111998621	cysteine-rich and transmembrane domain-containing protein WIH2-like	protein-coding
112006393	LOC112006393	protein transport protein Sec61 subunit gamma-1	protein-coding
111983705	LOC111983705	3-methyl-2-oxobutanoate hydroxymethyltransferase 1, mitochondrial-like	protein-coding
111995119	LOC111995119	beta-fructofuranosidase, insoluble isoenzyme CWINV1-like	protein-coding
112029825	LOC112029825	uncharacterized LOC112029825	protein-coding
111993145	LOC111993145	ATP synthase subunit beta, mitochondrial	protein-coding
112026339	LOC112026339	protein EXORDIUM-like	protein-coding
112027536	LOC112027536	ethylene-responsive transcription factor ERF110-like	protein-coding
111982974	LOC111982974	40S ribosomal protein S30	protein-coding
112016629	LOC112016629	uncharacterized LOC112016629	pseudo
112002299	LOC112002299	uncharacterized LOC112002299	protein-coding
112033104	LOC112033104	uncharacterized LOC112033104	ncRNA
112015795	LOC112015795	uncharacterized LOC112015795	protein-coding
111998770	LOC111998770	uncharacterized isomerase BH0283-like	protein-coding
112023868	LOC112023868	endoglucanase 19-like	protein-coding
112000357	LOC112000357	60S ribosomal protein L26-1	protein-coding
112031885	LOC112031885	indole-3-acetic acid-induced protein ARG2	protein-coding
112008532	LOC112008532	40S ribosomal protein S3-2	protein-coding
111985185	LOC111985185	eukaryotic translation initiation factor 3 subunit M-like	protein-coding
112011040	LOC112011040	gamma carbonic anhydrase 1, mitochondrial	protein-coding
111996712	LOC111996712	pleiotropic drug resistance protein 2-like	protein-coding
111995949	LOC111995949	uncharacterized LOC111995949	protein-coding
111994344	LOC111994344	cytochrome P450 CYP736A12-like	pseudo
112027554	LOC112027554	non-functional NADPH-dependent codeinone reductase 2-like	protein-coding
111996892	LOC111996892	alpha-latroinsectotoxin-Lt1a-like	protein-coding
112022809	LOC112022809	uncharacterized LOC112022809	protein-coding
112002917	LOC112002917	receptor-like protein kinase HAIKU2	protein-coding
112039627	LOC112039627	uncharacterized LOC112039627	protein-coding
111997471	LOC111997471	uncharacterized LOC111997471	protein-coding
112028639	LOC112028639	putative ripening-related protein 1	protein-coding
112003040	LOC112003040	NDR1/HIN1-like protein 3	protein-coding
112026135	LOC112026135	12-oxophytodienoate reductase 2-like	protein-coding
112006441	LOC112006441	uncharacterized LOC112006441	protein-coding
112040881	LOC112040881	monooxygenase 2-like	protein-coding
112040741	LOC112040741	cytochrome P450 81D11-like	protein-coding
112028801	LOC112028801	60S ribosomal protein L44-like	protein-coding
112022222	LOC112022222	cyclin-D3-3-like	protein-coding
112005006	LOC112005006	wound-induced basic protein	protein-coding
111999366	LOC111999366	glutathione transferase GST 23-like	pseudo
112015193	LOC112015193	spermidine synthase 1	protein-coding
112038084	LOC112038084	transcriptional regulator ATRX homolog	protein-coding
112019451	LOC112019451	adenosine kinase 2	protein-coding
112033284	LOC112033284	monooxygenase 2-like	protein-coding
111991195	LOC111991195	40S ribosomal protein S15a-1	protein-coding
112025123	LOC112025123	adenosine kinase 2	protein-coding
111996771	LOC111996771	WD repeat-containing protein LWD1-like	protein-coding
112008729	LOC112008729	uncharacterized LOC112008729	protein-coding
112020654	LOC112020654	peroxisome biogenesis protein 16	protein-coding
111992967	LOC111992967	uncharacterized LOC111992967	protein-coding
112020603	LOC112020603	polyol transporter 5-like	protein-coding
112034124	LOC112034124	uncharacterized LOC112034124	protein-coding
112020610	LOC112020610	uncharacterized LOC112020610	protein-coding
111985835	LOC111985835	uncharacterized LOC111985835	protein-coding
112029000	LOC112029000	G-type lectin S-receptor-like serine/threonine-protein kinase At4g27290	pseudo
112029893	LOC112029893	indole-3-acetate O-methyltransferase 1	protein-coding
112007653	LOC112007653	E3 ubiquitin-protein ligase ATL6-like	protein-coding
112034433	LOC112034433	late embryogenesis abundant protein At1g64065-like	protein-coding
112039434	LOC112039434	chaperonin CPN60-2, mitochondrial	protein-coding
112034929	LOC112034929	probable protein disulfide-isomerase A6	protein-coding
112000313	LOC112000313	probable aminotransferase TAT2	protein-coding
112010039	LOC112010039	calmodulin-binding receptor kinase CaMRLK-like	protein-coding
111995961	LOC111995961	glutaredoxin-C1-like	protein-coding
112016569	LOC112016569	glutaredoxin-C1-like	protein-coding
111984737	LOC111984737	MDIS1-interacting receptor like kinase 2-like	protein-coding
111993345	LOC111993345	F-box/kelch-repeat protein At3g27150-like	protein-coding
112011651	LOC112011651	probable signal peptidase complex subunit 1	protein-coding
111987457	LOC111987457	uncharacterized LOC111987457	protein-coding
112027030	LOC112027030	thiamine-repressible mitochondrial transport protein THI74-like	protein-coding
112022682	LOC112022682	uncharacterized LOC112022682	protein-coding
112034277	LOC112034277	cytochrome P450 81E8-like	protein-coding
112013055	LOC112013055	late embryogenesis abundant protein At1g64065-like	protein-coding
112033256	LOC112033256	cinnamoyl-CoA reductase-like SNL6	protein-coding
112018540	LOC112018540	cytochrome b561 and DOMON domain-containing protein At5g47530-like	protein-coding
111987020	LOC111987020	cysteine-rich repeat secretory protein 55-like	protein-coding
112030430	LOC112030430	non-functional NADPH-dependent codeinone reductase 2-like	protein-coding
112033476	LOC112033476	2-hydroxyisoflavanone dehydratase-like	protein-coding
112008545	LOC112008545	caffeic acid 3-O-methyltransferase-like	protein-coding
112032341	LOC112032341	12-oxophytodienoate reductase 2-like	protein-coding
111998523	LOC111998523	probable WRKY transcription factor 28	protein-coding
112037868	LOC112037868	G-type lectin S-receptor-like serine/threonine-protein kinase At4g27290	pseudo
112035938	LOC112035938	D-3-phosphoglycerate dehydrogenase 1, chloroplastic-like	protein-coding
112002087	LOC112002087	salutaridine reductase-like	pseudo
112008534	LOC112008534	caffeic acid 3-O-methyltransferase-like	protein-coding
111987772	LOC111987772	60S ribosomal protein L37-1	protein-coding
111990894	LOC111990894	G-type lectin S-receptor-like serine/threonine-protein kinase RKS1	pseudo
112019355	LOC112019355	UDP-glycosyltransferase 74E1-like	protein-coding
111985891	LOC111985891	cytochrome P450 CYP736A12-like	pseudo
112034957	LOC112034957	polyphenol oxidase, chloroplastic-like	protein-coding
112022188	LOC112022188	60S ribosomal protein L34	protein-coding
111992994	LOC111992994	mitochondrial import inner membrane translocase subunit Tim9-like	protein-coding
112027900	LOC112027900	peroxisomal (S)-2-hydroxy-acid oxidase GLO4-like	protein-coding
112002857	LOC112002857	pathogenesis-related protein PR-4-like	protein-coding
112033528	LOC112033528	high-affinity nitrate transporter 3.2	protein-coding
111998487	LOC111998487	MLP-like protein 31	protein-coding
111991490	LOC111991490	probable glutathione S-transferase parC	pseudo
112014128	LOC112014128	two-on-two hemoglobin-3-like	protein-coding
112010582	LOC112010582	alpha-1,3-mannosyl-glycoprotein 2-beta-N-acetylglucosaminyltransferase	protein-coding
111983680	LOC111983680	uncharacterized isomerase BH0283-like	pseudo
112014745	LOC112014745	laccase-14-like	protein-coding
112025391	LOC112025391	berberine bridge enzyme-like 8	protein-coding
112018479	LOC112018479	60S ribosomal protein L35a-3-like	protein-coding
111997054	LOC111997054	glutathione transferase GST 23-like	pseudo
111987725	LOC111987725	protein NRT1/ PTR FAMILY 3.1-like	protein-coding
112018578	LOC112018578	uncharacterized LOC112018578	protein-coding
112006630	LOC112006630	nascent polypeptide-associated complex subunit beta-like	protein-coding
112003512	LOC112003512	12-oxophytodienoate reductase 1-like	protein-coding
112010720	LOC112010720	pyrroline-5-carboxylate reductase	protein-coding
111996686	LOC111996686	uncharacterized LOC111996686	protein-coding
111998752	LOC111998752	basic 7S globulin-like	protein-coding
111993092	LOC111993092	transcription factor CSA-like	protein-coding
112036531	LOC112036531	mitogen-activated protein kinase kinase kinase 18-like	protein-coding
112002043	LOC112002043	salutaridine reductase-like	protein-coding
111987437	LOC111987437	uncharacterized N-acetyltransferase p20-like	pseudo
112007470	LOC112007470	probable S-sulfocysteine synthase, chloroplastic	protein-coding
112040236	LOC112040236	glucan endo-1,3-beta-glucosidase, basic isoform-like	protein-coding
112020818	LOC112020818	uncharacterized LOC112020818	protein-coding
112034362	LOC112034362	cytochrome P450 81E8-like	protein-coding
112007704	LOC112007704	transcription factor MYB41	protein-coding
112022586	LOC112022586	polygalacturonase-1 non-catalytic subunit beta-like	protein-coding
111989312	LOC111989312	enolase 1, chloroplastic-like	protein-coding
112027424	LOC112027424	cytochrome b-c1 complex subunit 9-like	protein-coding
112001111	LOC112001111	putative disease resistance RPP13-like protein 1	protein-coding
112010976	LOC112010976	major allergen Pru av 1-like	protein-coding
112018341	LOC112018341	uncharacterized LOC112018341	protein-coding
111993336	LOC111993336	phosphoethanolamine N-methyltransferase 1-like	protein-coding
111996662	LOC111996662	60S ribosomal protein L8-3-like	protein-coding
111993240	LOC111993240	enolase-like	protein-coding
111988471	LOC111988471	40S ribosomal protein S21-2	protein-coding
112029640	LOC112029640	abscisic acid receptor PYR1	protein-coding
111994345	LOC111994345	cytochrome P450 CYP736A12-like	protein-coding
111995998	LOC111995998	glutathione S-transferase U8-like	protein-coding
111997053	LOC111997053	glutathione transferase GST 23-like	pseudo
112039560	LOC112039560	endochitinase-like	protein-coding
111997072	LOC111997072	cationic peroxidase 2-like	protein-coding
112005470	LOC112005470	probable signal peptidase complex subunit 1	protein-coding
112009020	LOC112009020	secoisolariciresinol dehydrogenase-like	protein-coding
112025429	LOC112025429	exosome complex component RRP43-like	pseudo
112033074	LOC112033074	elongation factor 1-beta 2	protein-coding
111998072	LOC111998072	probable auxin efflux carrier component 1b	protein-coding
111993290	LOC111993290	uncharacterized LOC111993290	ncRNA
112032273	LOC112032273	40S ribosomal protein S15a-1-like	protein-coding
112015224	LOC112015224	VQ motif-containing protein 22-like	protein-coding
112032790	LOC112032790	polygalacturonase At1g48100	protein-coding
112038873	LOC112038873	UDP-glycosyltransferase 74E2-like	protein-coding
112000064	LOC112000064	ubiquitin-conjugating enzyme E2-23 kDa-like	protein-coding
111993385	LOC111993385	sm-like protein LSM36B	protein-coding
112008638	LOC112008638	ethylene-responsive transcription factor ERF110-like	protein-coding
112017435	LOC112017435	60S ribosomal protein L37-3	protein-coding
111988421	LOC111988421	alpha-xylosidase 1-like	protein-coding
111984644	LOC111984644	histidinol-phosphate aminotransferase, chloroplastic-like	protein-coding
111986597	LOC111986597	30S ribosomal protein S17-like	protein-coding
112018096	LOC112018096	cationic peroxidase 2-like	protein-coding
112012911	LOC112012911	probable 9-cis-epoxycarotenoid dioxygenase NCED5, chloroplastic	protein-coding
111984351	LOC111984351	beta-amyrin synthase-like	protein-coding
111983019	LOC111983019	dnaJ homolog subfamily B member 4	protein-coding
112006907	LOC112006907	2-isopropylmalate synthase 2, chloroplastic-like	protein-coding
112024112	LOC112024112	uncharacterized protein At2g39795, mitochondrial-like	protein-coding
112032171	LOC112032171	serine/threonine-protein kinase STY13-like	protein-coding
112015513	LOC112015513	uncharacterized LOC112015513	protein-coding
112038003	LOC112038003	F-box protein At1g61340-like	protein-coding
111999492	LOC111999492	60S ribosomal protein L24	protein-coding
111986352	LOC111986352	heat shock 70 kDa protein, mitochondrial	protein-coding
112012077	LOC112012077	ankyrin repeat-containing protein BDA1-like	protein-coding
112020125	LOC112020125	transcription elongation factor 1 homolog	protein-coding
111992118	LOC111992118	extracellular ribonuclease LE-like	protein-coding
112016168	LOC112016168	NDR1/HIN1-like protein 10	protein-coding
112036549	LOC112036549	peroxisomal membrane protein PMP22-like	protein-coding
112025325	LOC112025325	probable small nuclear ribonucleoprotein F	protein-coding
112026322	LOC112026322	7-deoxyloganetin glucosyltransferase-like	protein-coding
111999125	LOC111999125	cyclic nucleotide-gated ion channel 1-like	pseudo
112032260	LOC112032260	uncharacterized LOC112032260	protein-coding
112032259	LOC112032259	protein NUCLEAR FUSION DEFECTIVE 6, chloroplastic/mitochondrial-like	protein-coding
111996475	LOC111996475	zinc finger protein GIS2-like	protein-coding
112035406	LOC112035406	transcription factor bHLH121-like	protein-coding
112031725	LOC112031725	cytochrome b5	protein-coding
112002323	LOC112002323	oligopeptide transporter 4-like	protein-coding
112016146	LOC112016146	dirigent protein 19-like	protein-coding
112033021	LOC112033021	zinc finger protein ZAT11-like	protein-coding
112040653	LOC112040653	nudix hydrolase 1-like	protein-coding
112025708	LOC112025708	4-coumarate--CoA ligase-like 7	protein-coding
112027634	LOC112027634	cationic peroxidase 2-like	protein-coding
112039867	LOC112039867	laccase-14-like	protein-coding
111989379	LOC111989379	ankyrin repeat-containing protein BDA1-like	protein-coding
112018048	LOC112018048	peroxisomal (S)-2-hydroxy-acid oxidase GLO4-like	protein-coding
112012378	LOC112012378	auxin-responsive protein IAA11	protein-coding
112038613	LOC112038613	universal stress protein PHOS32	protein-coding
112017056	LOC112017056	F-box protein SKIP27-like	protein-coding
111986109	LOC111986109	beta-galactosidase 5-like	protein-coding
112016445	LOC112016445	60S ribosomal protein L23a	protein-coding
112035545	LOC112035545	nucleolar protein 56-like	protein-coding
112000977	LOC112000977	cytochrome P450 CYP82D47-like	protein-coding
111996463	LOC111996463	putative wall-associated receptor kinase-like 16	protein-coding
112032817	LOC112032817	glutathione S-transferase U8-like	protein-coding
111996119	LOC111996119	tropinone reductase homolog At5g06060-like	protein-coding
112034197	LOC112034197	uncharacterized LOC112034197	ncRNA
112032302	LOC112032302	50S ribosomal protein L30-like	protein-coding
111987296	LOC111987296	homeobox-leucine zipper protein ATHB-12-like	protein-coding
112034675	LOC112034675	60S ribosomal protein L7a-1	protein-coding
112024671	LOC112024671	60S ribosomal protein L13-1-like	pseudo
112025598	LOC112025598	peptidyl-prolyl cis-trans isomerase CYP19-3	protein-coding
111993261	LOC111993261	UDP-glycosyltransferase 43-like	pseudo
112004286	LOC112004286	probable pectinesterase/pectinesterase inhibitor 12	protein-coding
112006798	LOC112006798	cytochrome P450 CYP82D47-like	protein-coding
112001041	LOC112001041	E3 ubiquitin-protein ligase RZFP34-like	protein-coding
112034394	LOC112034394	endochitinase EP3-like	protein-coding
111989395	LOC111989395	uncharacterized LOC111989395	ncRNA
112027109	LOC112027109	serine-threonine kinase receptor-associated protein-like	protein-coding
112018456	LOC112018456	NAC domain-containing protein 87-like	protein-coding
112039296	LOC112039296	collagen alpha-1(XVII) chain-like	protein-coding
112006607	LOC112006607	transducin beta-like protein 3	protein-coding
112028434	LOC112028434	uncharacterized LOC112028434	ncRNA
112016117	LOC112016117	NAC transcription factor 29-like	protein-coding
112038242	LOC112038242	salutaridine reductase-like	protein-coding
112039226	LOC112039226	universal stress protein PHOS34-like	pseudo
112006102	LOC112006102	spermine synthase	protein-coding
112005287	LOC112005287	glutathione S-transferase L3-like	protein-coding
112007456	LOC112007456	NADH--cytochrome b5 reductase 1	protein-coding
112027779	LOC112027779	7-deoxyloganetin glucosyltransferase-like	protein-coding
111989701	LOC111989701	expansin-like B1	protein-coding
112032065	LOC112032065	40S ribosomal protein S9-2-like	protein-coding
112039159	LOC112039159	proteasome subunit alpha type-3	protein-coding
112022211	LOC112022211	small nuclear ribonucleoprotein E-like	protein-coding
112018099	LOC112018099	ethylene-responsive transcription factor 1B-like	protein-coding
112001453	LOC112001453	cytochrome b-c1 complex subunit 9-like	protein-coding
112026065	LOC112026065	7-deoxyloganetin glucosyltransferase-like	protein-coding
112038209	LOC112038209	uncharacterized LOC112038209	protein-coding
112003815	LOC112003815	hydroxymethylglutaryl-CoA synthase-like	protein-coding
112032357	LOC112032357	DNA topoisomerase 1	protein-coding
112026395	LOC112026395	transcription factor bHLH30-like	protein-coding
111985189	LOC111985189	aspartokinase 2, chloroplastic-like	protein-coding
112013993	LOC112013993	eukaryotic translation initiation factor 4E-1-like	protein-coding
111988596	LOC111988596	serine carboxypeptidase-like 40	protein-coding
111998363	LOC111998363	flavin-containing monooxygenase FMO GS-OX-like 4	protein-coding
111997593	LOC111997593	auxin-responsive protein IAA9-like	protein-coding
112025366	LOC112025366	40S ribosomal protein S25-4-like	protein-coding
112040129	LOC112040129	pyruvate decarboxylase 2	protein-coding
112003964	LOC112003964	GTP-binding nuclear protein Ran-3	protein-coding
112008893	LOC112008893	uncharacterized LOC112008893	ncRNA
112014129	LOC112014129	two-on-two hemoglobin-3-like	protein-coding
111999461	LOC111999461	metal tolerance protein 10-like	protein-coding
112001052	LOC112001052	uncharacterized LOC112001052	protein-coding
112033020	LOC112033020	sm-like protein LSM36B	protein-coding
112031722	LOC112031722	3-oxo-Delta(4,5)-steroid 5-beta-reductase-like	pseudo
112005215	LOC112005215	UPF0160 protein C694.04c-like	protein-coding
112012935	LOC112012935	NDR1/HIN1-like protein 6	protein-coding
112019878	LOC112019878	endochitinase EP3-like	protein-coding
112034173	LOC112034173	lysine-specific histone demethylase 1 homolog 1-like	protein-coding
112033571	LOC112033571	lysine-specific histone demethylase 1 homolog 1-like	protein-coding
111983720	LOC111983720	uncharacterized LOC111983720	protein-coding
111988229	LOC111988229	ferritin, chloroplastic	protein-coding
112034392	LOC112034392	endochitinase EP3-like	protein-coding
112006936	LOC112006936	protein DETOXIFICATION 41-like	protein-coding
112029634	LOC112029634	monooxygenase 2-like	protein-coding
112028645	LOC112028645	glutathione S-transferase zeta class-like	protein-coding
112034022	LOC112034022	laccase-14-like	protein-coding
112006628	LOC112006628	nascent polypeptide-associated complex subunit beta-like	protein-coding
112026449	LOC112026449	dihydrolipoyllysine-residue acetyltransferase component 4 of pyruvate dehydrogenase complex, chloroplastic	protein-coding
111989518	LOC111989518	alcohol dehydrogenase-like	protein-coding
111997278	LOC111997278	cysteine-rich repeat secretory protein 38-like	protein-coding
112028168	LOC112028168	transcription factor WER-like	protein-coding
112006423	LOC112006423	acetolactate synthase 3, chloroplastic	protein-coding
111992992	LOC111992992	putative E3 ubiquitin-protein ligase XBAT31	protein-coding
111996788	LOC111996788	60S ribosome subunit biogenesis protein NIP7 homolog	protein-coding
112001053	LOC112001053	uncharacterized LOC112001053	protein-coding
112011321	LOC112011321	erlin-1-like	protein-coding
111985758	LOC111985758	eukaryotic translation initiation factor 5A-2-like	protein-coding
112025301	LOC112025301	glutamine-dependent NAD(+) synthetase	protein-coding
112024105	LOC112024105	NADPH-dependent aldo-keto reductase, chloroplastic-like	protein-coding
112012659	LOC112012659	translin	protein-coding
111988202	LOC111988202	pentatricopeptide repeat-containing protein At1g20300, mitochondrial-like	protein-coding
112016458	LOC112016458	60S ribosomal protein L23a-like	protein-coding
112010793	LOC112010793	uncharacterized LOC112010793	protein-coding
112024148	LOC112024148	NADPH-dependent aldo-keto reductase, chloroplastic-like	protein-coding
112013816	LOC112013816	60S ribosomal protein L27-3-like	protein-coding
112019474	LOC112019474	serine/threonine-protein kinase STY13-like	protein-coding
112034408	LOC112034408	uncharacterized LOC112034408	protein-coding
111996010	LOC111996010	uncharacterized LOC111996010	protein-coding
112007691	LOC112007691	(+)-neomenthol dehydrogenase-like	pseudo
112035541	LOC112035541	adenylate kinase 4	protein-coding
111984548	LOC111984548	serine carboxypeptidase-like 18	protein-coding
112039339	LOC112039339	cysteine-rich repeat secretory protein 38-like	protein-coding
112038927	LOC112038927	cysteine-rich repeat secretory protein 38-like	protein-coding
112024626	LOC112024626	40S ribosomal protein S25-2	protein-coding
112030719	LOC112030719	outer envelope pore protein 16-3, chloroplastic/mitochondrial	protein-coding
111987243	LOC111987243	metal tolerance protein 10-like	protein-coding
111999188	LOC111999188	endochitinase EP3-like	protein-coding
111996469	LOC111996469	glyoxylate/succinic semialdehyde reductase 1	protein-coding
112032321	LOC112032321	12-oxophytodienoate reductase 2-like	pseudo
112039331	LOC112039331	mitochondrial import inner membrane translocase subunit Tim13	protein-coding
112004532	LOC112004532	UDP-glycosyltransferase 89B2-like	pseudo
112012163	LOC112012163	anthocyanidin 3-O-glucosyltransferase 5-like	protein-coding
111988235	LOC111988235	protein NRT1/ PTR FAMILY 5.10-like	protein-coding
111989558	LOC111989558	organelle RRM domain-containing protein 2, mitochondrial	protein-coding
112025779	LOC112025779	transmembrane protein 147	protein-coding
112022529	LOC112022529	uncharacterized LOC112022529	protein-coding
112010616	LOC112010616	UDP-glycosyltransferase 89B2-like	protein-coding
112019746	LOC112019746	CASP-like protein 1F1	protein-coding
111988050	LOC111988050	non-functional NADPH-dependent codeinone reductase 2-like	pseudo
112038705	LOC112038705	uncharacterized LOC112038705	protein-coding
111988592	LOC111988592	glucan endo-1,3-beta-glucosidase, basic vacuolar isoform-like	pseudo
111993317	LOC111993317	NADH dehydrogenase ubiquinone flavoprotein 2, mitochondrial	protein-coding
112026137	LOC112026137	uncharacterized LOC112026137	protein-coding
112010562	LOC112010562	ADP,ATP carrier protein, mitochondrial-like	protein-coding
112037373	LOC112037373	pathogenesis-related protein PR-4-like	protein-coding
112027173	LOC112027173	acyl-protein thioesterase 2-like	protein-coding
111992535	LOC111992535	kelch repeat-containing protein At3g27220-like	protein-coding
112003426	LOC112003426	NADP-dependent malic enzyme-like	protein-coding
112031644	LOC112031644	LIM domain-containing protein WLIM1-like	protein-coding
112034994	LOC112034994	early nodulin-like protein 1	protein-coding
111985779	LOC111985779	G-type lectin S-receptor-like serine/threonine-protein kinase At4g27290	protein-coding
111983983	LOC111983983	uncharacterized LOC111983983	protein-coding
112000216	LOC112000216	GTP-binding nuclear protein Ran-3-like	protein-coding
111993679	LOC111993679	bifunctional riboflavin biosynthesis protein RIBA 1, chloroplastic-like	pseudo
111987314	LOC111987314	60S ribosomal protein L8-3	protein-coding
112004358	LOC112004358	ethylene-responsive transcription factor 12	protein-coding
112025070	LOC112025070	glutamyl-tRNA reductase 2, chloroplastic-like	protein-coding
112019084	LOC112019084	uncharacterized LOC112019084	protein-coding
112002048	LOC112002048	thaumatin-like protein	pseudo
112002295	LOC112002295	1-aminocyclopropane-1-carboxylate oxidase homolog 4-like	protein-coding
112013959	LOC112013959	60S ribosome subunit biogenesis protein NIP7 homolog	protein-coding
111986502	LOC111986502	serine carboxypeptidase-like 45	protein-coding
112039556	LOC112039556	dihydropyrimidinase-like	protein-coding
112029374	LOC112029374	probable 2-oxoglutarate-dependent dioxygenase At5g05600	pseudo
112004678	LOC112004678	protein DETOXIFICATION 12-like	protein-coding
111984798	LOC111984798	40S ribosomal protein S17-3-like	protein-coding
112015735	LOC112015735	glutelin type-B 2-like	protein-coding
112017953	LOC112017953	uncharacterized LOC112017953	protein-coding
111987088	LOC111987088	basic blue protein-like	protein-coding
112005245	LOC112005245	14-3-3-like protein B	protein-coding
112016174	LOC112016174	putative gamma-glutamylcyclotransferase At3g02910	protein-coding
112005605	LOC112005605	40S ribosomal protein S19-1-like	protein-coding
112019217	LOC112019217	uncharacterized LOC112019217	protein-coding
112001490	LOC112001490	mitochondrial import receptor subunit TOM20-like	protein-coding
112004535	LOC112004535	UDP-glycosyltransferase 89B1-like	protein-coding
112015616	LOC112015616	AP2/ERF and B3 domain-containing transcription factor RAV1-like	protein-coding
112025010	LOC112025010	plant cysteine oxidase 2-like	protein-coding
111998494	LOC111998494	protein C2-DOMAIN ABA-RELATED 7-like	protein-coding
112004893	LOC112004893	7-deoxyloganetin glucosyltransferase-like	pseudo
112008383	LOC112008383	endo-1,3;1,4-beta-D-glucanase-like	protein-coding
112033769	LOC112033769	probable 2-oxoglutarate-dependent dioxygenase At5g05600	pseudo
112004191	LOC112004191	pentatricopeptide repeat-containing protein At4g14050, mitochondrial-like	protein-coding
112029717	LOC112029717	60S ribosomal protein L39-3	protein-coding
112003066	LOC112003066	3-hydroxy-3-methylglutaryl-coenzyme A reductase 1-like	protein-coding
112000392	LOC112000392	D-xylose-proton symporter-like 2	protein-coding
112012984	LOC112012984	exocyst complex component EXO70E2	protein-coding
112004468	LOC112004468	pentatricopeptide repeat-containing protein At1g20300, mitochondrial-like	protein-coding
112001672	LOC112001672	F-box protein At2g32560-like	protein-coding
111992473	LOC111992473	cytochrome c1 2, heme protein, mitochondrial-like	protein-coding
112038600	LOC112038600	glycine-rich RNA-binding protein-like	protein-coding
111982975	LOC111982975	asparagine--tRNA ligase, cytoplasmic 1-like	protein-coding
112028684	LOC112028684	carbonic anhydrase 2-like	protein-coding
111984350	LOC111984350	beta-amyrin 28-oxidase-like	protein-coding
112028983	LOC112028983	NADH dehydrogenase ubiquinone 1 alpha subcomplex subunit 6-like	protein-coding
112011039	LOC112011039	proteasome subunit alpha type-1-B-like	protein-coding
112010594	LOC112010594	nucleolar complex protein 4 homolog	protein-coding
112005435	LOC112005435	epsin-3	protein-coding
111984950	LOC111984950	UDP-glycosyltransferase 73C6-like	protein-coding
112033888	LOC112033888	14-3-3 protein 7	protein-coding
112003113	LOC112003113	DIS3-like exonuclease 2	protein-coding
112035598	LOC112035598	glucan endo-1,3-beta-glucosidase, basic isoform-like	protein-coding
111987309	LOC111987309	60S ribosomal protein L8-3	protein-coding
112027346	LOC112027346	probable mitochondrial-processing peptidase subunit beta, mitochondrial	protein-coding
112022494	LOC112022494	uncharacterized LOC112022494	protein-coding
112007549	LOC112007549	uncharacterized LOC112007549	ncRNA
111999428	LOC111999428	elongation factor 1-alpha	protein-coding
112014946	LOC112014946	pentatricopeptide repeat-containing protein At1g73710	protein-coding
112024466	LOC112024466	ornithine aminotransferase, mitochondrial	protein-coding
112010444	LOC112010444	caffeic acid 3-O-methyltransferase-like	pseudo
112039421	LOC112039421	transcription factor bHLH87	protein-coding
112019017	LOC112019017	amino acid transporter ANT1	protein-coding
111999908	LOC111999908	cytochrome c1-2, heme protein, mitochondrial	protein-coding
111993980	LOC111993980	phospholipase A2-alpha	protein-coding
112012433	LOC112012433	beta-amyrin 28-oxidase-like	protein-coding
112028576	LOC112028576	major allergen Pru ar 1-like	protein-coding
111984642	LOC111984642	bifunctional dihydroflavonol 4-reductase/flavanone 4-reductase-like	protein-coding
112025842	LOC112025842	precursor of CEP9-like	protein-coding
111994578	LOC111994578	protein MKS1-like	pseudo
112035318	LOC112035318	hydroquinone glucosyltransferase-like	protein-coding
112025507	LOC112025507	endoplasmin homolog	protein-coding
111992707	LOC111992707	protein SHI RELATED SEQUENCE 1	protein-coding
112001752	LOC112001752	aspartic proteinase-like protein 2	protein-coding
112034677	LOC112034677	60S ribosomal protein L7a-1	protein-coding
112026091	LOC112026091	protein NUCLEAR FUSION DEFECTIVE 6, chloroplastic/mitochondrial	protein-coding
111998304	LOC111998304	protein ECERIFERUM 1-like	protein-coding
112015926	LOC112015926	uncharacterized LOC112015926	pseudo
112002003	LOC112002003	3-isopropylmalate dehydrogenase 2, chloroplastic-like	protein-coding
112026047	LOC112026047	uncharacterized LOC112026047	ncRNA
111986794	LOC111986794	uncharacterized LOC111986794	protein-coding
112028172	LOC112028172	acanthoscurrin-1-like	protein-coding
112001110	LOC112001110	probable S-adenosylmethionine-dependent methyltransferase At5g37990	protein-coding
112007721	LOC112007721	uncharacterized LOC112007721	pseudo
112032280	LOC112032280	protein transport protein Sec61 subunit gamma-like	protein-coding
111998493	LOC111998493	protein C2-DOMAIN ABA-RELATED 7-like	protein-coding
112011755	LOC112011755	adenylosuccinate lyase-like	protein-coding
112040731	LOC112040731	eukaryotic translation initiation factor 2 subunit beta-like	protein-coding
112001883	LOC112001883	polyadenylate-binding protein 2	protein-coding
112015896	LOC112015896	probable aldo-keto reductase 1	protein-coding
112003036	LOC112003036	uncharacterized LOC112003036	protein-coding
112019779	LOC112019779	uncharacterized LOC112019779	protein-coding
112003767	LOC112003767	GDSL esterase/lipase At5g45670-like	protein-coding
112037051	LOC112037051	uncharacterized LOC112037051	ncRNA
111987688	LOC111987688	uncharacterized LOC111987688	protein-coding
112039288	LOC112039288	uncharacterized LOC112039288	ncRNA
112015889	LOC112015889	T-complex protein 1 subunit epsilon	protein-coding
112027985	LOC112027985	glycine-rich RNA-binding protein-like	protein-coding
112012430	LOC112012430	protein STABILIZED1-like	protein-coding
112025228	LOC112025228	transport and Golgi organization 2 homolog	protein-coding
112031608	LOC112031608	glutathione S-transferase U10-like	protein-coding
111985820	LOC111985820	linoleate 13S-lipoxygenase 3-1, chloroplastic-like	protein-coding
112005020	LOC112005020	uncharacterized LOC112005020	protein-coding
112038856	LOC112038856	cysteine-rich repeat secretory protein 55-like	protein-coding
112000157	LOC112000157	probable glutathione S-transferase	protein-coding
112004181	LOC112004181	auxin-responsive protein SAUR22-like	protein-coding
112009320	LOC112009320	protease Do-like 10, mitochondrial	protein-coding
111985578	LOC111985578	transport and Golgi organization 2 homolog	protein-coding
112006565	LOC112006565	NADH dehydrogenase ubiquinone iron-sulfur protein 5-B	protein-coding
111987265	LOC111987265	NADH dehydrogenase ubiquinone 1 alpha subcomplex subunit 6-like	protein-coding
111984895	LOC111984895	ethylene response sensor 1	protein-coding
112008594	LOC112008594	metalloendoproteinase 2-MMP-like	protein-coding
112000159	LOC112000159	probable glutathione S-transferase	protein-coding
112007696	LOC112007696	(+)-neomenthol dehydrogenase-like	pseudo
112019064	LOC112019064	isoeugenol synthase 1-like	protein-coding
112008968	LOC112008968	ribosome biogenesis regulatory protein homolog	protein-coding
112010417	LOC112010417	protein transport protein SEC13 homolog B-like	protein-coding
112015816	LOC112015816	60S ribosomal protein L35	protein-coding
112006033	LOC112006033	polygalacturonase QRT3-like	protein-coding
112020187	LOC112020187	uncharacterized LOC112020187	protein-coding
111997437	LOC111997437	peptidyl-prolyl cis-trans isomerase CYP19-3	protein-coding
112000419	LOC112000419	adenylyl-sulfate kinase, chloroplastic-like	protein-coding
112029714	LOC112029714	60S ribosomal protein L39-1	protein-coding
112012600	LOC112012600	auxin-responsive protein IAA29-like	protein-coding
111993050	LOC111993050	60S ribosomal protein L22-2-like	protein-coding
112034321	LOC112034321	cytochrome P450 81E8-like	protein-coding
112023588	LOC112023588	peroxisomal (S)-2-hydroxy-acid oxidase GLO4-like	pseudo
112025797	LOC112025797	protein REVERSION-TO-ETHYLENE SENSITIVITY1-like	protein-coding
111994760	LOC111994760	uncharacterized LOC111994760	protein-coding
112023386	LOC112023386	uncharacterized LOC112023386	protein-coding
112038778	LOC112038778	ATP synthase subunit O, mitochondrial	protein-coding
112017611	LOC112017611	uncharacterized LOC112017611	protein-coding
112033148	LOC112033148	methionine aminotransferase	protein-coding
112000429	LOC112000429	wound-induced protein 1	protein-coding
111990374	LOC111990374	pyruvate kinase 2, cytosolic-like	protein-coding
112023968	LOC112023968	pentatricopeptide repeat-containing protein At4g35850, mitochondrial	protein-coding
112030431	LOC112030431	uncharacterized LOC112030431	ncRNA
112033113	LOC112033113	2,3-bisphosphoglycerate-independent phosphoglycerate mutase-like	protein-coding
112034001	LOC112034001	polygalacturonase At1g48100-like	protein-coding
111989378	LOC111989378	uncharacterized LOC111989378	protein-coding
112004939	LOC112004939	60S ribosomal protein L35	protein-coding
111997349	LOC111997349	NADP-dependent D-sorbitol-6-phosphate dehydrogenase-like	protein-coding
111996472	LOC111996472	uncharacterized protein OsI_027940	protein-coding
112015674	LOC112015674	probable nucleolar protein 5-1	protein-coding
111992299	LOC111992299	ribose-phosphate pyrophosphokinase 1	protein-coding
112034055	LOC112034055	uncharacterized acetyltransferase At3g50280	protein-coding
111991923	LOC111991923	protein ETHYLENE INSENSITIVE 3-like	protein-coding
112019090	LOC112019090	putative disease resistance RPP13-like protein 1	protein-coding
112025577	LOC112025577	actin-7	protein-coding
112001753	LOC112001753	pectinesterase 3-like	protein-coding
111990234	LOC111990234	receptor-like protein kinase HAIKU2	protein-coding
112023684	LOC112023684	protein SHOOT GRAVITROPISM 5-like	protein-coding
112038254	LOC112038254	elongation factor 2	protein-coding
112012139	LOC112012139	carboxylesterase 1-like	pseudo
112001054	LOC112001054	uncharacterized LOC112001054	protein-coding
112008695	LOC112008695	protein DETOXIFICATION 49-like	protein-coding
112010374	LOC112010374	branched-chain-amino-acid aminotransferase-like protein 1	protein-coding
111984793	LOC111984793	G-type lectin S-receptor-like serine/threonine-protein kinase At1g34300	protein-coding
112029841	LOC112029841	NDR1/HIN1-like protein 13	protein-coding
111983239	LOC111983239	dof zinc finger protein DOF2.5-like	protein-coding
112023818	LOC112023818	glycine cleavage system H protein 2, mitochondrial	protein-coding
111997153	LOC111997153	threonine dehydratase biosynthetic, chloroplastic	protein-coding
111998623	LOC111998623	eukaryotic translation initiation factor 5A-2-like	protein-coding
111997333	LOC111997333	1-aminocyclopropane-1-carboxylate synthase 3-like	pseudo
111990238	LOC111990238	protein pxr1	protein-coding
112006559	LOC112006559	VQ motif-containing protein 22-like	protein-coding
112022920	LOC112022920	translocon-associated protein subunit alpha-like	protein-coding
111997468	LOC111997468	probable beta-1,4-xylosyltransferase IRX10L	protein-coding
112036664	LOC112036664	GDSL esterase/lipase At1g28570-like	protein-coding
112039490	LOC112039490	protein ALP1-like	protein-coding
112007320	LOC112007320	uncharacterized protein At5g64816	protein-coding
112000522	LOC112000522	protein REVERSION-TO-ETHYLENE SENSITIVITY1-like	protein-coding
112000366	LOC112000366	mitochondrial outer membrane protein porin 2-like	protein-coding
112019882	LOC112019882	protein BOLA4, chloroplastic/mitochondrial-like	protein-coding
112001355	LOC112001355	uncharacterized protein At2g39795, mitochondrial-like	protein-coding
112003983	LOC112003983	carbon catabolite repressor protein 4 homolog 4-like	protein-coding
112003982	LOC112003982	carbon catabolite repressor protein 4 homolog 4-like	protein-coding
112003455	LOC112003455	early nodulin-93-like	protein-coding
112028054	LOC112028054	60S ribosomal protein L31-like	protein-coding
112013693	LOC112013693	60S ribosomal protein L27-3-like	protein-coding
111987702	LOC111987702	acyl carrier protein 1, chloroplastic-like	protein-coding
111989479	LOC111989479	H/ACA ribonucleoprotein complex subunit 4-like	protein-coding
112020612	LOC112020612	crocetin glucosyltransferase, chloroplastic-like	protein-coding
112027570	LOC112027570	uncharacterized LOC112027570	ncRNA
112005214	LOC112005214	mitochondrial import receptor subunit TOM20-like	protein-coding
112011855	LOC112011855	zinc finger protein MAGPIE-like	protein-coding
112020941	LOC112020941	dentin sialophosphoprotein-like	protein-coding
111990467	LOC111990467	nucleoside diphosphate kinase 3-like	protein-coding
112040088	LOC112040088	uncharacterized LOC112040088	protein-coding
112034847	LOC112034847	aconitate hydratase, cytoplasmic	protein-coding
112000652	LOC112000652	huntingtin-interacting protein K-like	protein-coding
112004686	LOC112004686	transcription factor MYB41-like	protein-coding
112008710	LOC112008710	endochitinase A2-like	protein-coding
112039598	LOC112039598	cyclic phosphodiesterase-like	protein-coding
112024748	LOC112024748	ER membrane protein complex subunit 2-like	protein-coding
112031610	LOC112031610	glutathione S-transferase U10-like	protein-coding
112015695	LOC112015695	21 kDa protein-like	protein-coding
111988990	LOC111988990	laccase-7-like	protein-coding
112016439	LOC112016439	aquaporin TIP1-3	protein-coding
112034981	LOC112034981	stellacyanin-like	protein-coding
112035297	LOC112035297	histone deacetylase HDT1-like	protein-coding
111999187	LOC111999187	endochitinase EP3-like	protein-coding
111995579	LOC111995579	serine acetyltransferase 1, chloroplastic-like	protein-coding
112026338	LOC112026338	40S ribosomal protein S6	protein-coding
112033615	LOC112033615	isocitrate dehydrogenase NADP	protein-coding
111994521	LOC111994521	protein EARLY FLOWERING 4-like	protein-coding
112008720	LOC112008720	polyphenol oxidase, chloroplastic-like	protein-coding
111999971	LOC111999971	UPF0481 protein At3g47200-like	protein-coding
112012681	LOC112012681	thiamine-repressible mitochondrial transport protein THI74-like	protein-coding
111986675	LOC111986675	DNA-binding protein HEXBP-like	protein-coding
112005465	LOC112005465	anthranilate synthase beta subunit 2, chloroplastic-like	protein-coding
112017492	LOC112017492	hydroxymethylglutaryl-CoA synthase-like	protein-coding
111997747	LOC111997747	S-adenosylmethionine synthase 2	protein-coding
111987566	LOC111987566	protein transport protein Sec61 subunit alpha-like	protein-coding
112028947	LOC112028947	uncharacterized LOC112028947	protein-coding
112002307	LOC112002307	small nucleolar RNA U31b	snoRNA
112024476	LOC112024476	uncharacterized LOC112024476	ncRNA
111988252	LOC111988252	hydroquinone glucosyltransferase-like	pseudo
112005481	LOC112005481	putative wall-associated receptor kinase-like 16	protein-coding
112038080	LOC112038080	glucan endo-1,3-beta-glucosidase 11-like	protein-coding
112004211	LOC112004211	uncharacterized LOC112004211	protein-coding
111985070	LOC111985070	inositol-3-phosphate synthase	protein-coding
111994038	LOC111994038	uncharacterized LOC111994038	protein-coding
112034421	LOC112034421	late embryogenesis abundant protein At1g64065-like	protein-coding
112006959	LOC112006959	laccase-14-like	protein-coding
112023252	LOC112023252	5-methyltetrahydropteroyltriglutamate--homocysteine methyltransferase	protein-coding
112009832	LOC112009832	39S ribosomal protein L45, mitochondrial-like	protein-coding
111991594	LOC111991594	ATP-dependent 6-phosphofructokinase 5, chloroplastic	protein-coding
111983199	LOC111983199	probable WRKY transcription factor 75	protein-coding
111996444	LOC111996444	pectinesterase 3-like	protein-coding
112039376	LOC112039376	mitochondrial proton/calcium exchanger protein-like	protein-coding
112000022	LOC112000022	chorismate synthase, chloroplastic	protein-coding
112015541	LOC112015541	uncharacterized LOC112015541	ncRNA
112025534	LOC112025534	pectinesterase 2-like	protein-coding
112017877	LOC112017877	enolase 1, chloroplastic-like	protein-coding
112017287	LOC112017287	dolichyl-diphosphooligosaccharide--protein glycosyltransferase subunit 4A	protein-coding
112007113	LOC112007113	non-functional pseudokinase ZED1-like	protein-coding
111997535	LOC111997535	uncharacterized LOC111997535	protein-coding
112005658	LOC112005658	copper transporter 2-like	protein-coding
112007602	LOC112007602	50S ribosomal protein L7/L12-like	protein-coding
112031649	LOC112031649	succinate--CoA ligase ADP-forming subunit beta, mitochondrial	protein-coding
112007604	LOC112007604	50S ribosomal protein L7/L12-like	protein-coding
112039624	LOC112039624	dirigent protein 22-like	protein-coding
112023613	LOC112023613	peroxisomal (S)-2-hydroxy-acid oxidase GLO4-like	protein-coding
111999820	LOC111999820	peroxisomal acyl-coenzyme A oxidase 1-like	protein-coding
111999586	LOC111999586	3-isopropylmalate dehydrogenase, chloroplastic-like	protein-coding
112026664	LOC112026664	lysine--tRNA ligase, chloroplastic/mitochondrial	protein-coding
112011788	LOC112011788	uncharacterized LOC112011788	ncRNA
112015339	LOC112015339	la protein 1	protein-coding
112024590	LOC112024590	protein LYK5	protein-coding
112032030	LOC112032030	glycine cleavage system H protein 2, mitochondrial-like	protein-coding
112022631	LOC112022631	1-aminocyclopropane-1-carboxylate oxidase homolog 4-like	protein-coding
111997517	LOC111997517	protein PHLOEM PROTEIN 2-LIKE A1-like	protein-coding
112010679	LOC112010679	serine carboxypeptidase-like 7	protein-coding
111987024	LOC111987024	cysteine-rich repeat secretory protein 55-like	protein-coding
111994183	LOC111994183	ATP-dependent DNA helicase 2 subunit KU70	protein-coding
112015233	LOC112015233	p21-activated protein kinase-interacting protein 1-like	protein-coding
111996658	LOC111996658	60S ribosomal protein L8-3-like	protein-coding
112008909	LOC112008909	TMV resistance protein N-like	protein-coding
112033025	LOC112033025	zinc finger protein ZAT11-like	protein-coding
111996332	LOC111996332	uncharacterized LOC111996332	protein-coding
111994734	LOC111994734	auxin-induced protein 15A-like	protein-coding
112003789	LOC112003789	umecyanin-like	protein-coding
112000650	LOC112000650	huntingtin-interacting protein K-like	protein-coding
112036571	LOC112036571	peroxidase 3-like	protein-coding
112007347	LOC112007347	uncharacterized LOC112007347	protein-coding
112034025	LOC112034025	reactive Intermediate Deaminase A, chloroplastic-like	protein-coding
112006671	LOC112006671	uncharacterized LOC112006671	ncRNA
111993447	LOC111993447	protein ENHANCED DISEASE RESISTANCE 2-like	protein-coding
112002897	LOC112002897	UDP-glycosyltransferase 92A1-like	protein-coding
111996176	LOC111996176	electron transfer flavoprotein subunit beta, mitochondrial-like	protein-coding
111983040	LOC111983040	queuosine salvage protein-like	protein-coding
111999783	LOC111999783	uncharacterized LOC111999783	protein-coding
112030971	LOC112030971	5'-adenylylsulfate reductase 3, chloroplastic-like	protein-coding
112039708	LOC112039708	6-phosphogluconate dehydrogenase, decarboxylating 3	protein-coding
111998643	LOC111998643	UDP-glycosyltransferase 73C3-like	protein-coding
111997249	LOC111997249	uncharacterized LOC111997249	protein-coding
111987389	LOC111987389	GDSL esterase/lipase At5g55050-like	protein-coding
112003234	LOC112003234	uncharacterized LOC112003234	protein-coding
111996759	LOC111996759	TORTIFOLIA1-like protein 2	protein-coding
112037059	LOC112037059	hemiasterlin resistant protein 1-like	protein-coding
111988586	LOC111988586	uncharacterized LOC111988586	protein-coding
111999063	LOC111999063	haloacid dehalogenase-like hydrolase domain-containing protein Sgpp	protein-coding
111986378	LOC111986378	uncharacterized LOC111986378	protein-coding
112010427	LOC112010427	CASP-like protein 3A1	protein-coding
111994756	LOC111994756	cytochrome P450 94A2-like	pseudo
112041173	LOC112041173	ubiquitin carboxyl-terminal hydrolase 2	protein-coding
112015807	LOC112015807	chalcone--flavonone isomerase-like	protein-coding
111994320	LOC111994320	berberine bridge enzyme-like 8	pseudo
112036206	LOC112036206	transcription factor TGAL1-like	protein-coding
111987415	LOC111987415	uncharacterized N-acetyltransferase p20-like	protein-coding
111993953	LOC111993953	transmembrane emp24 domain-containing protein p24beta2-like	protein-coding
112020584	LOC112020584	U3 small nucleolar RNA-associated protein 4-like	protein-coding
112008894	LOC112008894	AT-hook motif nuclear-localized protein 22-like	protein-coding
112029478	LOC112029478	gibberellin 20 oxidase 1-like	protein-coding
112017090	LOC112017090	NADH dehydrogenase ubiquinone 1 alpha subcomplex subunit 1	protein-coding
112010010	LOC112010010	UDP-glucose flavonoid 3-O-glucosyltransferase 6-like	protein-coding
112026684	LOC112026684	DEAD-box ATP-dependent RNA helicase 18	protein-coding
112003962	LOC112003962	cytochrome P450 94A2-like	pseudo
112002178	LOC112002178	eukaryotic initiation factor 4A-2-like	protein-coding
111987095	LOC111987095	basic blue protein-like	protein-coding
112024804	LOC112024804	cyclin-B1-2-like	protein-coding
112034484	LOC112034484	geraniol 8-hydroxylase-like	protein-coding
111986080	LOC111986080	uncharacterized LOC111986080	pseudo
112040870	LOC112040870	monooxygenase 2-like	pseudo
112023863	LOC112023863	uncharacterized LOC112023863	protein-coding
111989597	LOC111989597	uncharacterized LOC111989597	ncRNA
112012125	LOC112012125	DNA-directed RNA polymerases I and III subunit RPAC2	protein-coding
112022892	LOC112022892	beta-xylosidase/alpha-L-arabinofuranosidase 2-like	protein-coding
112008195	LOC112008195	cyclic dof factor 3-like	pseudo
112020065	LOC112020065	protein RETICULATA-RELATED 1, chloroplastic-like	protein-coding
111984996	LOC111984996	G-type lectin S-receptor-like serine/threonine-protein kinase RKS1	pseudo
112035782	LOC112035782	uncharacterized LOC112035782	protein-coding
112034423	LOC112034423	late embryogenesis abundant protein At1g64065-like	protein-coding
112017567	LOC112017567	ACT domain-containing protein ACR4-like	protein-coding
111994733	LOC111994733	auxin-induced protein 15A-like	pseudo
112025392	LOC112025392	geraniol 8-hydroxylase-like	protein-coding
112019837	LOC112019837	eukaryotic translation initiation factor 3 subunit K-like	protein-coding
112040701	LOC112040701	60S ribosomal protein L31	protein-coding
111988217	LOC111988217	abscisic acid receptor PYL4-like	protein-coding
112004179	LOC112004179	auxin-responsive protein SAUR21-like	pseudo
112019933	LOC112019933	uncharacterized LOC112019933	ncRNA
112038565	LOC112038565	sphingolipid C9-methyltransferase 2-like	pseudo
112018935	LOC112018935	major allergen Pru ar 1-like	protein-coding
112024863	LOC112024863	UDP-glycosyltransferase 74E2-like	protein-coding
111992272	LOC111992272	protein P21-like	protein-coding
112037979	LOC112037979	disease resistance protein At4g27190-like	protein-coding
111985101	LOC111985101	probable ATP synthase 24 kDa subunit, mitochondrial	protein-coding
111989666	LOC111989666	hydroquinone glucosyltransferase-like	pseudo
112028301	LOC112028301	7-deoxyloganetin glucosyltransferase-like	protein-coding
112009321	LOC112009321	non-specific lipid-transfer protein 2-like	protein-coding
112012956	LOC112012956	general transcription and DNA repair factor IIH subunit TFB1-1-like	protein-coding
112027658	LOC112027658	actin	protein-coding
111987015	LOC111987015	uncharacterized LOC111987015	protein-coding
111996663	LOC111996663	cation/calcium exchanger 4-like	protein-coding
112005250	LOC112005250	actin-7-like	protein-coding
112024556	LOC112024556	uncharacterized LOC112024556	protein-coding
111999968	LOC111999968	flavin mononucleotide hydrolase 1, chloroplatic	protein-coding
112038031	LOC112038031	glucan endo-1,3-beta-glucosidase 11-like	protein-coding
112015664	LOC112015664	mediator of RNA polymerase II transcription subunit 34-like	protein-coding
112023890	LOC112023890	uncharacterized LOC112023890	protein-coding
112040210	LOC112040210	receptor-like protein kinase HAIKU2	protein-coding
112028402	LOC112028402	peroxidase A2-like	protein-coding
112022199	LOC112022199	NAC domain-containing protein 72	protein-coding
112035430	LOC112035430	proteasome subunit alpha type-7	protein-coding
111996077	LOC111996077	histone-lysine N-methyltransferase ATXR2	protein-coding
112039891	LOC112039891	39S ribosomal protein L45, mitochondrial-like	protein-coding
112011734	LOC112011734	NADP-dependent malic enzyme	protein-coding
112040650	LOC112040650	5-methyltetrahydropteroyltriglutamate--homocysteine methyltransferase-like	protein-coding
112007117	LOC112007117	protein EXORDIUM-like	protein-coding
112015380	LOC112015380	probable acetyl-CoA acetyltransferase, cytosolic 2	protein-coding
112009213	LOC112009213	probable 2-oxoglutarate-dependent dioxygenase JRG21	protein-coding
111984863	LOC111984863	ER membrane protein complex subunit 10	protein-coding
112017634	LOC112017634	protein NRT1/ PTR FAMILY 2.11-like	protein-coding
112010465	LOC112010465	uncharacterized LOC112010465	protein-coding
112026683	LOC112026683	LOB domain-containing protein 12-like	protein-coding
112004675	LOC112004675	protein DETOXIFICATION 12-like	protein-coding
112019112	LOC112019112	probable S-adenosylmethionine-dependent methyltransferase At5g37990	pseudo
112006547	LOC112006547	small nuclear ribonucleoprotein Sm D2	protein-coding
111994093	LOC111994093	plant cysteine oxidase 2-like	protein-coding
112026545	LOC112026545	probable disease resistance protein At4g27220	protein-coding
112027505	LOC112027505	60S acidic ribosomal protein P0-like	protein-coding
112032761	LOC112032761	cytochrome P450 734A1	protein-coding
112031150	LOC112031150	2-hydroxyisoflavanone dehydratase-like	protein-coding
112039524	LOC112039524	ribonuclease TUDOR 1	protein-coding
112022551	LOC112022551	protein MIZU-KUSSEI 1	protein-coding
111998751	LOC111998751	uncharacterized LOC111998751	protein-coding
111998784	LOC111998784	transcription factor PRE6-like	protein-coding
111986324	LOC111986324	glucan endo-1,3-beta-glucosidase, basic vacuolar isoform-like	pseudo
112025661	LOC112025661	cytochrome c oxidase subunit 6b-1	protein-coding
112039749	LOC112039749	40S ribosomal protein S19-3-like	protein-coding
111982955	LOC111982955	UTP--glucose-1-phosphate uridylyltransferase	protein-coding
112020925	LOC112020925	7-deoxyloganetin glucosyltransferase-like	pseudo
111994405	LOC111994405	protein LIGHT-DEPENDENT SHORT HYPOCOTYLS 5-like	protein-coding
111990868	LOC111990868	1-aminocyclopropane-1-carboxylate oxidase homolog 4-like	protein-coding
112004316	LOC112004316	isopentenyl-diphosphate Delta-isomerase I-like	protein-coding
111986981	LOC111986981	plant cysteine oxidase 2-like	protein-coding
111988481	LOC111988481	cyclic nucleotide-gated ion channel 1-like	protein-coding
112026301	LOC112026301	protein LIGHT-DEPENDENT SHORT HYPOCOTYLS 5-like	protein-coding
111996871	LOC111996871	NAP1-related protein 2-like	protein-coding
112007186	LOC112007186	glucan endo-1,3-beta-glucosidase 12-like	protein-coding
112026470	LOC112026470	60S ribosomal protein L13a-4-like	protein-coding
111993076	LOC111993076	abscisic acid 8'-hydroxylase 1	protein-coding
112012128	LOC112012128	mitochondrial import inner membrane translocase subunit TIM10	protein-coding
112035806	LOC112035806	uncharacterized LOC112035806	protein-coding
112012095	LOC112012095	dolichyl-diphosphooligosaccharide--protein glycosyltransferase subunit DAD1	protein-coding
111988452	LOC111988452	pentatricopeptide repeat-containing protein At4g14050, mitochondrial-like	protein-coding
112027473	LOC112027473	40S ribosomal protein S15-4	protein-coding
112005048	LOC112005048	polypyrimidine tract-binding protein homolog 3	protein-coding
112027146	LOC112027146	UPF0481 protein At3g47200-like	pseudo
112032787	LOC112032787	probable boron transporter 2	protein-coding
112035576	LOC112035576	N-alpha-acetyltransferase MAK3-like	protein-coding
112022203	LOC112022203	small nuclear ribonucleoprotein E-like	protein-coding
111987116	LOC111987116	cell division cycle-associated protein 7-like	protein-coding
112024158	LOC112024158	uncharacterized LOC112024158	protein-coding
112031843	LOC112031843	transcription factor MYB63-like	protein-coding
111986501	LOC111986501	uncharacterized LOC111986501	ncRNA
112027835	LOC112027835	protein cornichon homolog 4-like	protein-coding
111984799	LOC111984799	40S ribosomal protein S17-3-like	protein-coding
111983991	LOC111983991	probable nucleolar protein 5-1	protein-coding
112033409	LOC112033409	40S ribosomal protein S13	protein-coding
111996317	LOC111996317	phosphatidylinositol transfer protein 1-like	protein-coding
112037309	LOC112037309	GDSL esterase/lipase At5g45670-like	protein-coding
112030694	LOC112030694	probable terpene synthase 2	pseudo
112029774	LOC112029774	basic form of pathogenesis-related protein 1-like	protein-coding
111998033	LOC111998033	transcription termination factor MTERF8, chloroplastic-like	protein-coding
111996551	LOC111996551	cysteine-rich receptor-like protein kinase 10	protein-coding
112038350	LOC112038350	leucine-rich repeat protein 1-like	protein-coding
112031046	LOC112031046	uncharacterized LOC112031046	protein-coding
111996230	LOC111996230	zinc-finger homeodomain protein 5-like	protein-coding
112007271	LOC112007271	proteasome subunit beta type-4	protein-coding
112040242	LOC112040242	tubulin alpha chain-like	protein-coding
111999432	LOC111999432	uncharacterized LOC111999432	protein-coding
112010383	LOC112010383	signal peptidase complex subunit 3B	protein-coding
112001480	LOC112001480	pentatricopeptide repeat-containing protein At2g30780-like	protein-coding
112031008	LOC112031008	26S proteasome non-ATPase regulatory subunit 7 homolog A-like	protein-coding
112041062	LOC112041062	glycine-rich protein 5-like	protein-coding
112028899	LOC112028899	uncharacterized LOC112028899	protein-coding
112019349	LOC112019349	UDP-glycosyltransferase 74E2-like	protein-coding
111995972	LOC111995972	serine/threonine-protein phosphatase PP1 isozyme 4	protein-coding
111986852	LOC111986852	protein JINGUBANG-like	protein-coding
111999137	LOC111999137	uncharacterized LOC111999137	protein-coding
112008849	LOC112008849	histone-lysine N-methyltransferase ATXR6	protein-coding
111997499	LOC111997499	histidinol-phosphate aminotransferase, chloroplastic-like	protein-coding
112015166	LOC112015166	patellin-6	protein-coding
112011148	LOC112011148	stomatin-like protein 2, mitochondrial	protein-coding
112002201	LOC112002201	mitogen-activated protein kinase kinase 2-like	protein-coding
112036257	LOC112036257	ethylene-responsive transcription factor 5-like	protein-coding
112016430	LOC112016430	triosephosphate isomerase, cytosolic-like	protein-coding
112032554	LOC112032554	mitochondrial-processing peptidase subunit alpha-like	protein-coding
111988205	LOC111988205	serine/threonine-protein kinase Nek2-like	protein-coding
111987354	LOC111987354	peroxidase 24-like	protein-coding
111990529	LOC111990529	linoleate 13S-lipoxygenase 2-1, chloroplastic-like	protein-coding
112018457	LOC112018457	isopentenyl-diphosphate Delta-isomerase I-like	protein-coding
111996984	LOC111996984	uncharacterized LOC111996984	protein-coding
112006689	LOC112006689	L-Ala-D/L-amino acid epimerase	protein-coding
111989491	LOC111989491	benzyl alcohol O-benzoyltransferase-like	protein-coding
112027293	LOC112027293	mitochondrial outer membrane protein porin 4-like	pseudo
111997707	LOC111997707	transmembrane protein 161B	protein-coding
112006796	LOC112006796	cytochrome P450 CYP82D47-like	protein-coding
112038215	LOC112038215	receptor-like protein kinase FERONIA	protein-coding
111985876	LOC111985876	60S ribosomal protein L8-3	protein-coding
112034951	LOC112034951	7-deoxyloganetin glucosyltransferase-like	pseudo
112015487	LOC112015487	uncharacterized LOC112015487	protein-coding
111994335	LOC111994335	60S ribosomal protein L6, mitochondrial-like	protein-coding
112012307	LOC112012307	cleft lip and palate transmembrane protein 1 homolog	protein-coding
112032032	LOC112032032	ankyrin repeat-containing protein BDA1-like	protein-coding
112016966	LOC112016966	pathogenesis-related homeodomain protein	protein-coding
112038745	LOC112038745	3-hydroxyisobutyryl-CoA hydrolase 1-like	protein-coding
111997553	LOC111997553	endochitinase-like	protein-coding
112003625	LOC112003625	junctophilin-1-like	protein-coding
112003449	LOC112003449	endoribonuclease YBEY, chloroplastic-like	protein-coding
112004934	LOC112004934	adenylosuccinate synthetase 2, chloroplastic	protein-coding
112019109	LOC112019109	serine/threonine-protein kinase Nek6-like	protein-coding
112006651	LOC112006651	nascent polypeptide-associated complex subunit beta-like	protein-coding
112038733	LOC112038733	3-hydroxyisobutyryl-CoA hydrolase 1-like	protein-coding
111995724	LOC111995724	amidophosphoribosyltransferase, chloroplastic-like	protein-coding
111990501	LOC111990501	uncharacterized LOC111990501	protein-coding
111988250	LOC111988250	high affinity sulfate transporter 2-like	protein-coding
111995990	LOC111995990	glutathione S-transferase U8-like	pseudo
111990626	LOC111990626	uncharacterized LOC111990626	protein-coding
111991080	LOC111991080	glucan endo-1,3-beta-glucosidase 4	protein-coding
111991980	LOC111991980	putative ribosome biogenesis protein C8F11.04	protein-coding
112006678	LOC112006678	serine--tRNA ligase-like	protein-coding
112014185	LOC112014185	CASP-like protein 2D1	protein-coding
112026195	LOC112026195	putative 1-phosphatidylinositol-3-phosphate 5-kinase FAB1C	pseudo
112019907	LOC112019907	ankyrin repeat-containing protein BDA1-like	protein-coding
112035570	LOC112035570	histone-lysine N-methyltransferase, H3 lysine-9 specific SUVH4	protein-coding
112024067	LOC112024067	uncharacterized LOC112024067	protein-coding
112001612	LOC112001612	heavy metal-associated isoprenylated plant protein 39	protein-coding
111986817	LOC111986817	zinc finger CCCH domain-containing protein 48-like	protein-coding
112024346	LOC112024346	dnaJ homolog subfamily B member 6	protein-coding
112033162	LOC112033162	60S acidic ribosomal protein P3-like	pseudo
111991834	LOC111991834	protein DMR6-LIKE OXYGENASE 2-like	protein-coding
112013965	LOC112013965	flowering-promoting factor 1-like protein 3	protein-coding
112003428	LOC112003428	uncharacterized LOC112003428	protein-coding
112016353	LOC112016353	RING-H2 finger protein ATL7-like	protein-coding
112025923	LOC112025923	uncharacterized LOC112025923	ncRNA
112033542	LOC112033542	quinolinate synthase, chloroplastic	protein-coding
111988078	LOC111988078	hydroquinone glucosyltransferase-like	pseudo
112035027	LOC112035027	berberine bridge enzyme-like 28	protein-coding
111990973	LOC111990973	arogenate dehydratase/prephenate dehydratase 6, chloroplastic-like	protein-coding
112012166	LOC112012166	carboxylesterase 1-like	protein-coding
111997481	LOC111997481	monodehydroascorbate reductase, seedling isozyme	protein-coding
112007107	LOC112007107	uncharacterized LOC112007107	protein-coding
111997571	LOC111997571	multiple organellar RNA editing factor 1, mitochondrial	protein-coding
111986089	LOC111986089	uncharacterized LOC111986089	protein-coding
111989565	LOC111989565	uncharacterized LOC111989565	protein-coding
112023792	LOC112023792	probable serine/threonine-protein kinase PBL12	protein-coding
112011949	LOC112011949	probable 2-oxoglutarate-dependent dioxygenase At5g05600	protein-coding
112011042	LOC112011042	ornithine carbamoyltransferase, chloroplastic	protein-coding
112017746	LOC112017746	tubulin alpha chain-like	protein-coding
112011269	LOC112011269	uncharacterized LOC112011269	ncRNA
112004421	LOC112004421	glutamate decarboxylase 1	protein-coding
112009881	LOC112009881	uncharacterized LOC112009881	protein-coding
112011005	LOC112011005	citrate synthase, glyoxysomal	protein-coding
111991900	LOC111991900	DNA-directed RNA polymerases II, IV and V subunit 12	protein-coding
111984718	LOC111984718	uncharacterized LOC111984718	protein-coding
111997416	LOC111997416	ubiquinol oxidase 4, chloroplastic/chromoplastic	protein-coding
112025416	LOC112025416	uncharacterized LOC112025416	ncRNA
112029708	LOC112029708	60S ribosomal protein L39-3	protein-coding
112018508	LOC112018508	pentatricopeptide repeat-containing protein At1g61870, mitochondrial	protein-coding
112012853	LOC112012853	ubiquitin domain-containing protein DSK2b-like	protein-coding
112009748	LOC112009748	protein XRI1-like	protein-coding
111995064	LOC111995064	uncharacterized LOC111995064	protein-coding
112016689	LOC112016689	3-isopropylmalate dehydrogenase 2, chloroplastic-like	protein-coding
112023047	LOC112023047	alpha-galactosidase 1-like	protein-coding
112029892	LOC112029892	uncharacterized LOC112029892	protein-coding
112023493	LOC112023493	phenylalanine ammonia-lyase-like	protein-coding
111999303	LOC111999303	60S ribosome subunit biogenesis protein NIP7 homolog	protein-coding
112012296	LOC112012296	bifunctional TH2 protein, mitochondrial-like	protein-coding
112017597	LOC112017597	basic form of pathogenesis-related protein 1-like	protein-coding
111992650	LOC111992650	probable inactive purple acid phosphatase 27	pseudo
112029948	LOC112029948	pyrophosphate--fructose 6-phosphate 1-phosphotransferase subunit alpha	protein-coding
112007355	LOC112007355	heat shock cognate 70 kDa protein 2	protein-coding
112017679	LOC112017679	glycerophosphodiester phosphodiesterase GDPD6	protein-coding
111986304	LOC111986304	protein OS-9 homolog	protein-coding
112010696	LOC112010696	protein FATTY ACID EXPORT 4, chloroplastic	protein-coding
112001704	LOC112001704	dol-P-Man:Man(7)GlcNAc(2)-PP-Dol alpha-1,6-mannosyltransferase	protein-coding
112029721	LOC112029721	early nodulin-20	protein-coding
112031652	LOC112031652	serine/threonine-protein kinase pakF-like	protein-coding
111986323	LOC111986323	polyol transporter 5-like	protein-coding
112011015	LOC112011015	HMG1/2-like protein	protein-coding
111986516	LOC111986516	lysM domain receptor-like kinase 3	protein-coding
112000039	LOC112000039	kelch domain-containing protein 4	protein-coding
112032744	LOC112032744	late embryogenesis abundant protein Lea5-like	protein-coding
111998137	LOC111998137	probable carboxylesterase 4, mitochondrial	protein-coding
112027839	LOC112027839	probable prolyl 4-hydroxylase 7	protein-coding
112035819	LOC112035819	uncharacterized LOC112035819	protein-coding
112000518	LOC112000518	putative GATA transcription factor 22	protein-coding
111985190	LOC111985190	STS14 protein	protein-coding
112038266	LOC112038266	protein XRI1-like	protein-coding
111985380	LOC111985380	bZIP transcription factor 11-like	protein-coding
112008405	LOC112008405	formate--tetrahydrofolate ligase	protein-coding
111998741	LOC111998741	small nuclear ribonucleoprotein SmD1b	protein-coding
112036296	LOC112036296	calmodulin-7-like	protein-coding
112008853	LOC112008853	4-hydroxy-tetrahydrodipicolinate synthase, chloroplastic-like	protein-coding
112032274	LOC112032274	protein transport protein Sec61 subunit gamma-like	protein-coding
112027354	LOC112027354	glycerol-3-phosphate dehydrogenase NAD(+) GPDHC1, cytosolic	protein-coding
111997406	LOC111997406	serine carboxypeptidase-like 18	protein-coding
112032025	LOC112032025	glyceraldehyde-3-phosphate dehydrogenase GAPCP1, chloroplastic-like	protein-coding
112038704	LOC112038704	LEAF RUST 10 DISEASE-RESISTANCE LOCUS RECEPTOR-LIKE PROTEIN KINASE-like 2.4	protein-coding
112004362	LOC112004362	protein SENSITIVE TO PROTON RHIZOTOXICITY 1-like	protein-coding
112041076	LOC112041076	inositol-3-phosphate synthase-like	protein-coding
111989592	LOC111989592	AAA-ATPase ASD, mitochondrial-like	pseudo
111991587	LOC111991587	probable glutathione S-transferase parC	protein-coding
112031486	LOC112031486	protein C2-DOMAIN ABA-RELATED 4-like	protein-coding
111989000	LOC111989000	glycine-rich cell wall structural protein-like	protein-coding
111987458	LOC111987458	uncharacterized N-acetyltransferase p20-like	protein-coding
112023629	LOC112023629	serine/threonine-protein kinase/endoribonuclease IRE1b-like	protein-coding
111990498	LOC111990498	uncharacterized LOC111990498	protein-coding
112012665	LOC112012665	elongation factor 1-delta-like	protein-coding
112028264	LOC112028264	MDIS1-interacting receptor like kinase 1-like	protein-coding
112033276	LOC112033276	multiprotein-bridging factor 1a	protein-coding
112011805	LOC112011805	uncharacterized LOC112011805	protein-coding
112015366	LOC112015366	uncharacterized LOC112015366	protein-coding
112016891	LOC112016891	60S ribosomal protein L13a-4-like	protein-coding
112039042	LOC112039042	uncharacterized LOC112039042	ncRNA
112009894	LOC112009894	ABC transporter G family member 11-like	protein-coding
112019464	LOC112019464	probable chalcone--flavonone isomerase 3	protein-coding
112023730	LOC112023730	protein yippee-like At4g27740	protein-coding
112032820	LOC112032820	ribosomal RNA-processing protein 14-C	protein-coding
112017901	LOC112017901	eukaryotic translation initiation factor 3 subunit J-like	protein-coding
112037203	LOC112037203	serine carboxypeptidase 24-like	protein-coding
111987568	LOC111987568	probable WRKY transcription factor 65	protein-coding
112033064	LOC112033064	isopentenyl-diphosphate Delta-isomerase I	protein-coding
112024826	LOC112024826	uncharacterized LOC112024826	ncRNA
112019119	LOC112019119	probable S-adenosylmethionine-dependent methyltransferase At5g37990	protein-coding
112038259	LOC112038259	molybdenum cofactor sulfurase-like	protein-coding
111996166	LOC111996166	electron transfer flavoprotein subunit beta, mitochondrial-like	protein-coding
112006580	LOC112006580	mitochondrial zinc maintenance protein 1, mitochondrial	protein-coding
112015617	LOC112015617	cytochrome P450 711A1	protein-coding
112004193	LOC112004193	protodermal factor 1-like	protein-coding
112000095	LOC112000095	protein transport protein Sec61 subunit alpha-like	protein-coding
112041021	LOC112041021	60S ribosomal protein L28-2-like	protein-coding
112007668	LOC112007668	E3 ubiquitin-protein ligase ATL31-like	protein-coding
112031481	LOC112031481	ferredoxin--NADP reductase, root isozyme, chloroplastic	protein-coding
112022633	LOC112022633	protein NUCLEAR FUSION DEFECTIVE 6, chloroplastic/mitochondrial	protein-coding
112002208	LOC112002208	G-type lectin S-receptor-like serine/threonine-protein kinase At4g27290	protein-coding
111998541	LOC111998541	uncharacterized LOC111998541	protein-coding
112026084	LOC112026084	7-deoxyloganetin glucosyltransferase-like	pseudo
112008309	LOC112008309	glutathionyl-hydroquinone reductase YqjG-like	protein-coding
112029582	LOC112029582	beta-amyrin 28-oxidase-like	pseudo
111993819	LOC111993819	tetraketide alpha-pyrone reductase 1-like	protein-coding
112011953	LOC112011953	auxin response factor 5	protein-coding
112023636	LOC112023636	uncharacterized LOC112023636	protein-coding
112010527	LOC112010527	40S ribosomal protein S3-3-like	pseudo
111990441	LOC111990441	ERC protein 2	protein-coding
111994048	LOC111994048	proteasome activator subunit 4	protein-coding
111987358	LOC111987358	polygalacturonase QRT3-like	protein-coding
111988579	LOC111988579	OTU domain-containing protein 6B-like	protein-coding
111986742	LOC111986742	protein DMR6-LIKE OXYGENASE 2-like	pseudo
111993027	LOC111993027	peroxidase 12	protein-coding
112013272	LOC112013272	DDB1- and CUL4-associated factor 13	protein-coding
112012266	LOC112012266	uncharacterized LOC112012266	protein-coding
112039566	LOC112039566	pentatricopeptide repeat-containing protein At1g62350	protein-coding
112012547	LOC112012547	F-box protein At3g56470-like	protein-coding
112035064	LOC112035064	probable leucine-rich repeat receptor-like serine/threonine-protein kinase At3g14840	pseudo
112015104	LOC112015104	early nodulin-75-like	protein-coding
112039324	LOC112039324	uncharacterized LOC112039324	protein-coding
111986350	LOC111986350	amino-acid permease BAT1 homolog	protein-coding
112010501	LOC112010501	serine racemase	protein-coding
112012102	LOC112012102	lachrymatory-factor synthase-like	protein-coding
111994435	LOC111994435	60S ribosomal protein L23a-1	protein-coding
112033397	LOC112033397	cold shock protein 1-like	protein-coding
112003507	LOC112003507	LOB domain-containing protein 29-like	protein-coding
112036486	LOC112036486	uncharacterized LOC112036486	protein-coding
112029613	LOC112029613	monooxygenase 2-like	protein-coding
112003150	LOC112003150	mitogen-activated protein kinase kinase 9-like	protein-coding
112023385	LOC112023385	toll/interleukin-1 receptor-like protein	protein-coding
112037170	LOC112037170	probable polygalacturonase	protein-coding
111988981	LOC111988981	cysteine synthase	protein-coding
112005260	LOC112005260	cytochrome b-c1 complex subunit 6	protein-coding
112003357	LOC112003357	60S ribosomal export protein NMD3	protein-coding
111998018	LOC111998018	uncharacterized LOC111998018	protein-coding
112005996	LOC112005996	proteasome subunit alpha type-2-B	protein-coding
112023341	LOC112023341	beta-galactosidase 10	protein-coding
111993928	LOC111993928	bifunctional nitrilase/nitrile hydratase NIT4A-like	protein-coding
111996809	LOC111996809	LOB domain-containing protein 29-like	protein-coding
111986602	LOC111986602	cyclic nucleotide-gated ion channel 1-like	protein-coding
111984011	LOC111984011	uncharacterized LOC111984011	protein-coding
112003424	LOC112003424	ATP-dependent 6-phosphofructokinase 6	protein-coding
112016946	LOC112016946	ABC transporter G family member 36-like	protein-coding
111988570	LOC111988570	hydroquinone glucosyltransferase-like	pseudo
111998864	LOC111998864	LOB domain-containing protein 29-like	protein-coding
112006427	LOC112006427	UDP-arabinopyranose mutase 1-like	protein-coding
111990231	LOC111990231	protein trichome birefringence-like 13	protein-coding
112018394	LOC112018394	protein FAR1-RELATED SEQUENCE 5-like	protein-coding
112016549	LOC112016549	uncharacterized protein DDB_G0271670-like	protein-coding
111986054	LOC111986054	uncharacterized LOC111986054	protein-coding
111990956	LOC111990956	uncharacterized LOC111990956	protein-coding
112039564	LOC112039564	calnexin homolog	protein-coding
111999809	LOC111999809	60S ribosomal protein L28-2-like	protein-coding
112009383	LOC112009383	myb-related protein 308-like	protein-coding
112000770	LOC112000770	LOB domain-containing protein 25-like	protein-coding
111986793	LOC111986793	transcription initiation factor TFIID subunit 6	protein-coding
111990607	LOC111990607	U-box domain-containing protein 30-like	protein-coding
111995860	LOC111995860	uncharacterized LOC111995860	protein-coding
111989613	LOC111989613	plant cysteine oxidase 2-like	protein-coding
111987701	LOC111987701	trihelix transcription factor GT-1-like	protein-coding
112011821	LOC112011821	calcium-binding protein CML38-like	protein-coding
111990919	LOC111990919	beta-glucosidase 40	protein-coding
112018092	LOC112018092	uncharacterized LOC112018092	protein-coding
111997634	LOC111997634	guanine nucleotide-binding protein-like NSN1	pseudo
112022960	LOC112022960	caffeic acid 3-O-methyltransferase-like	protein-coding
112002209	LOC112002209	uncharacterized LOC112002209	ncRNA
111998032	LOC111998032	reactive Intermediate Deaminase A, chloroplastic-like	protein-coding
112019215	LOC112019215	short-chain dehydrogenase reductase 3b-like	protein-coding
112008973	LOC112008973	uncharacterized LOC112008973	protein-coding
112037478	LOC112037478	LOB domain-containing protein 40-like	protein-coding
112038919	LOC112038919	protein TIFY 10A-like	protein-coding
112024763	LOC112024763	uncharacterized LOC112024763	protein-coding
112015348	LOC112015348	guanosine nucleotide diphosphate dissociation inhibitor 2	protein-coding
112001605	LOC112001605	uncharacterized LOC112001605	protein-coding
111997109	LOC111997109	TIMELESS-interacting protein	protein-coding
111995315	LOC111995315	probable ATP synthase 24 kDa subunit, mitochondrial	pseudo
112018036	LOC112018036	60S ribosomal protein L28-2-like	protein-coding
112022599	LOC112022599	1-acylglycerol-3-phosphate O-acyltransferase-like	protein-coding
112006723	LOC112006723	nascent polypeptide-associated complex subunit beta-like	protein-coding
112031016	LOC112031016	sulfoquinovosyl transferase SQD2-like	protein-coding
112007697	LOC112007697	(+)-neomenthol dehydrogenase-like	pseudo
111984354	LOC111984354	beta-amyrin synthase-like	protein-coding
112030722	LOC112030722	luminal-binding protein 5-like	protein-coding
112015981	LOC112015981	gamma carbonic anhydrase 1, mitochondrial-like	protein-coding
111989581	LOC111989581	methionine S-methyltransferase	protein-coding
112019636	LOC112019636	calmodulin	protein-coding
112015974	LOC112015974	uncharacterized LOC112015974	protein-coding
112039462	LOC112039462	flavonoid 3'-monooxygenase	protein-coding
112022275	LOC112022275	protein WVD2-like 7	protein-coding
112039748	LOC112039748	elongation factor 1-gamma 2-like	pseudo
111995751	LOC111995751	tRNA-dihydrouridine(16/17) synthase NAD(P)(+)-like	protein-coding
111992066	LOC111992066	probable beta-D-xylosidase 6	protein-coding
111998851	LOC111998851	60S ribosomal protein L6, mitochondrial-like	protein-coding
111990261	LOC111990261	signal recognition particle 19 kDa protein	protein-coding
112027903	LOC112027903	probable glutathione S-transferase	protein-coding
112028049	LOC112028049	VAN3-binding protein	protein-coding
112024704	LOC112024704	protein DETOXIFICATION 40-like	protein-coding
112012393	LOC112012393	proline--tRNA ligase, cytoplasmic-like	protein-coding
112004822	LOC112004822	pentatricopeptide repeat-containing protein At2g29760, chloroplastic-like	protein-coding
112036026	LOC112036026	serine carboxypeptidase-like 33	protein-coding
112040673	LOC112040673	protein HOTHEAD	protein-coding
112008597	LOC112008597	ankyrin repeat-containing protein BDA1-like	protein-coding
112024117	LOC112024117	mannose-1-phosphate guanylyltransferase 1-like	protein-coding
111990968	LOC111990968	nuclear/nucleolar GTPase 2	protein-coding
112004853	LOC112004853	zinc finger A20 and AN1 domain-containing stress-associated protein 1-like	protein-coding
112024831	LOC112024831	putative disease resistance RPP13-like protein 1	protein-coding
112024068	LOC112024068	monooxygenase 2-like	protein-coding
112009025	LOC112009025	U-box domain-containing protein 26-like	protein-coding
112017520	LOC112017520	endoplasmic reticulum-Golgi intermediate compartment protein 3	protein-coding
111996692	LOC111996692	protein STRICTOSIDINE SYNTHASE-LIKE 4-like	protein-coding
111994170	LOC111994170	importin beta-like SAD2	protein-coding
111992852	LOC111992852	probable pectinesterase/pectinesterase inhibitor 51	protein-coding
112017134	LOC112017134	tRNA pseudouridine synthase A	protein-coding
111998762	LOC111998762	uncharacterized protein At5g39865	protein-coding
112023626	LOC112023626	oligopeptide transporter 7-like	protein-coding
112019770	LOC112019770	G-type lectin S-receptor-like serine/threonine-protein kinase RKS1	protein-coding
112019781	LOC112019781	dnaJ homolog subfamily B member 13-like	protein-coding
112014943	LOC112014943	protein STRUBBELIG-RECEPTOR FAMILY 3-like	protein-coding
112005279	LOC112005279	premnaspirodiene oxygenase-like	protein-coding
112018529	LOC112018529	tobamovirus multiplication protein 1	protein-coding
112034516	LOC112034516	cinnamoyl-CoA reductase 2-like	protein-coding
112034611	LOC112034611	ABC transporter E family member 2	protein-coding
112026454	LOC112026454	MADS-box transcription factor 23-like	protein-coding
111994378	LOC111994378	T-complex protein 1 subunit alpha-like	protein-coding
111997823	LOC111997823	uncharacterized LOC111997823	protein-coding
111997754	LOC111997754	L-type lectin-domain containing receptor kinase S.4-like	protein-coding
112000330	LOC112000330	3-ketoacyl-CoA synthase 11-like	protein-coding
112002311	LOC112002311	oligopeptide transporter 4-like	protein-coding
111987780	LOC111987780	protein NRT1/ PTR FAMILY 3.1-like	protein-coding
112005543	LOC112005543	uncharacterized LOC112005543	protein-coding
112015097	LOC112015097	aspartic proteinase nepenthesin-1	protein-coding
112002332	LOC112002332	uncharacterized LOC112002332	ncRNA
112014164	LOC112014164	transportin MOS14	protein-coding
111985969	LOC111985969	uncharacterized LOC111985969	ncRNA
111999441	LOC111999441	ATP synthase subunit d, mitochondrial	protein-coding
111983009	LOC111983009	E3 ubiquitin-protein ligase At1g63170	protein-coding
112022966	LOC112022966	probable calcium-binding protein CML48	protein-coding
112010496	LOC112010496	uncharacterized LOC112010496	protein-coding
111986788	LOC111986788	acyl carrier protein 3, mitochondrial	protein-coding
111992110	LOC111992110	transcription factor bHLH93-like	protein-coding
112022713	LOC112022713	TMV resistance protein N-like	protein-coding
112010653	LOC112010653	uncharacterized LOC112010653	protein-coding
112037479	LOC112037479	uncharacterized LOC112037479	protein-coding
112026306	LOC112026306	probable ribose-5-phosphate isomerase 2	protein-coding
111996713	LOC111996713	pleiotropic drug resistance protein 2-like	pseudo
112013908	LOC112013908	peroxisomal 2,4-dienoyl-CoA reductase-like	protein-coding
112038363	LOC112038363	ubiquitin fusion degradation protein 1 homolog	protein-coding
112022460	LOC112022460	transcription factor WER	protein-coding
112016134	LOC112016134	oligopeptide transporter 4-like	protein-coding
111996893	LOC111996893	ankyrin-2-like	protein-coding
111986876	LOC111986876	putative receptor-like protein kinase At4g00960	pseudo
112005051	LOC112005051	ABC transporter B family member 11-like	protein-coding
111998865	LOC111998865	red chlorophyll catabolite reductase-like	protein-coding
112009389	LOC112009389	mitogen-activated protein kinase 7-like	protein-coding
112009354	LOC112009354	2-oxoglutarate-dependent dioxygenase DAO-like	protein-coding
111994400	LOC111994400	mitochondrial import inner membrane translocase subunit TIM22-4-like	protein-coding
112005537	LOC112005537	WUSCHEL-related homeobox 13	protein-coding
112008418	LOC112008418	ATP-dependent DNA helicase At3g02060, chloroplastic	protein-coding
111996007	LOC111996007	chalcone synthase	protein-coding
111987080	LOC111987080	mRNA turnover protein 4 homolog	protein-coding
112004169	LOC112004169	geraniol 8-hydroxylase-like	protein-coding
111983049	LOC111983049	zinc metalloprotease ZmpB	protein-coding
112003038	LOC112003038	uncharacterized LOC112003038	protein-coding
112030969	LOC112030969	nascent polypeptide-associated complex subunit alpha-like protein 1	protein-coding

## Sheet: Table S5
Table S5.- Gene ID, Gene Symbol and Gene Name of the genes in Figure 2B
Gene ID	Gene Symbol	Gene name
112010559	LOC112010559	extensin-2-like
112039050	LOC112039050	36.4 kDa proline-rich protein
112021099	LOC112021099	probable glutathione S-transferase isoform X1
112020432	LOC112020432	probable glutathione S-transferase
112014108	LOC112014108	ethylene-responsive transcription factor ERF113-like
111997959	LOC111997959	scopoletin glucosyltransferase-like
112035115	LOC112035115	cysteine-rich repeat secretory protein 38-like
111994370	LOC111994370	uncharacterized protein LOC111994370
111985947	LOC111985947	cationic peroxidase 1-like
112004276	LOC112004276	UDP-glycosyltransferase 76F1-like isoform X1
112035773	LOC112035773	putative ripening-related protein 1
112005979	LOC112005979	major allergen Pru ar 1-like
112033147	LOC112033147	probable WRKY transcription factor 31
112023030	LOC112023030	two-component response regulator-like APRR1
112004789	LOC112004789	potassium transporter 5-like
112008710	LOC112008710	endochitinase A2-like
112008709	LOC112008709	endochitinase-like
112003986	LOC112003986	stigma-specific STIG1-like protein 3
112034444	LOC112034444	stigma-specific STIG1-like protein 3
112023711	LOC112023711	acid phosphatase 1-like

## Sheet: Table S6
Table S6.- Gene ID, Gene Symbol and Gene Name of the genes in Figure 3B
Gene ID	Gene Symbol	Gene name
112039050	LOC112039050	36.4 kDa proline-rich protein
112021099	LOC112021099	probable glutathione S-transferase isoform X1
112020432	LOC112020432	probable glutathione S-transferase
112014108	LOC112014108	ethylene-responsive transcription factor ERF113-like
111994370	LOC111994370	uncharacterized protein LOC111994370
111985947	LOC111985947	cationic peroxidase 1-like
111997959	LOC111997959	scopoletin glucosyltransferase-like
112024345	LOC112024345	uncharacterized transporter C405.03c-like
112034346	LOC112034346	cytochrome P450 81E8-like isoform X1
111987550	LOC111987550	LOB domain-containing protein 16
112005578	LOC112005578	putative methyltransferase DDB_G0268948
112034347	LOC112034347	cytochrome P450 81E8-like
112002134	LOC112002134	NADPH:quinone oxidoreductase-like
111984558	LOC111984558	serine carboxypeptidase-like 13
112026171	LOC112026171	glutamate decarboxylase-like
112032254	LOC112032254	probable indole-3-acetic acid-amido synthetase GH3.1
112004276	LOC112004276	UDP-glycosyltransferase 76F1-like isoform X1
112004210	LOC112004210	uncharacterized protein LOC112004210
112005580	LOC112005580	putative methyltransferase DDB_G0268948 isoform X1
112010559	LOC112010559	extensin-2-like

## Sheet: Table S7
Table S7.- Gene ID, Gene Symbol and Gene Name of the transcription factors common to the Wounding and the Wounding + IBA treatments (Fig. 4C)
Gene ID	Gene Symbol	Gene name
112004686	LOC112004686	transcription factor MYB41-like
112006814	LOC112006814	transcription factor bHLH149-like
111996147	LOC111996147	ethylene-responsive transcription factor 1B
112012112	LOC112012112	dof zinc finger protein DOF5.6
111984856	LOC111984856	ethylene-responsive transcription factor RAP2-3-like
112033397	LOC112033397	cold shock protein 1-like
111998872	LOC111998872	heat shock factor protein HSF24
111991923	LOC111991923	protein ETHYLENE INSENSITIVE 3-like
111983199	LOC111983199	probable WRKY transcription factor 75
112008638	LOC112008638	ethylene-responsive transcription factor ERF110-like
112001675	LOC112001675	ethylene-responsive transcription factor 4-like
112020180	LOC112020180	ethylene-responsive transcription factor RAP2-3-like
111987550	LOC111987550	LOB domain-containing protein 16
112014108	LOC112014108	ethylene-responsive transcription factor ERF113-like
112032157	LOC112032157	transcription factor PCL1-like
112008493	LOC112008493	transcription factor JUNGBRUNNEN 1-like
112031843	LOC112031843	transcription factor MYB63-like
112035692	LOC112035692	NAC domain-containing protein 2-like
112020158	LOC112020158	pathogenesis-related genes transcriptional activator PTI5-like
111998523	LOC111998523	probable WRKY transcription factor 28
112023030	LOC112023030	two-component response regulator-like APRR1
111993092	LOC111993092	transcription factor CSA-like
112026395	LOC112026395	transcription factor bHLH30-like
111985052	LOC111985052	ethylene-responsive transcription factor ERF113-like
112040974	LOC112040974	ethylene-responsive transcription factor 4-like
112033147	LOC112033147	probable WRKY transcription factor 31
112037478	LOC112037478	LOB domain-containing protein 40-like
112035443	LOC112035443	NAC domain-containing protein 2-like
112026301	LOC112026301	protein LIGHT-DEPENDENT SHORT HYPOCOTYLS 5-like
112036257	LOC112036257	ethylene-responsive transcription factor 5-like
112016117	LOC112016117	NAC transcription factor 29-like
112028209	LOC112028209	transcription factor MYB4-like
111996475	LOC111996475	zinc finger protein GIS2-like
112006022	LOC112006022	ethylene-responsive transcription factor RAP2-3-like
111994405	LOC111994405	protein LIGHT-DEPENDENT SHORT HYPOCOTYLS 5-like
112011855	LOC112011855	zinc finger protein MAGPIE-like
111987568	LOC111987568	probable WRKY transcription factor 65
112018099	LOC112018099	ethylene-responsive transcription factor 1B-like
112035569	LOC112035569	ethylene-responsive transcription factor ERF113-like
112018456	LOC112018456	NAC domain-containing protein 87-like

## Sheet: Table S8
Table S8.- Gene ID, Gene Symbol and Gene Name of the transcription factors uniquely identified in the Wounding + IBA treatment (Fig. 4D)
Gene ID	Gene Symbol	Gene name
111992110	LOC111992110	transcription factor bHLH93-like
111990149	LOC111990149	heat stress transcription factor B-2a-like
111997607	LOC111997607	transcription factor bHLH93-like
111996809	LOC111996809	LOB domain-containing protein 29-like
111987701	LOC111987701	trihelix transcription factor GT-1-like
111988456	LOC111988456	auxin-responsive protein IAA20-like
112035406	LOC112035406	transcription factor bHLH121-like
112028168	LOC112028168	transcription factor WER-like
112027116	LOC112027116	auxin-responsive protein IAA17-like
112003507	LOC112003507	LOB domain-containing protein 29-like
111987296	LOC111987296	homeobox-leucine zipper protein ATHB-12-like
112033025	LOC112033025	zinc finger protein ZAT11-like
112007704	LOC112007704	transcription factor MYB41
112005537	LOC112005537	WUSCHEL-related homeobox 13
112032540	LOC112032540	auxin-responsive protein IAA9
112039421	LOC112039421	transcription factor bHLH87
111998829	LOC111998829	auxin-induced protein 22D-like
112026454	LOC112026454	MADS-box transcription factor 23-like
111998784	LOC111998784	transcription factor PRE6-like
111986675	LOC111986675	DNA-binding protein HEXBP-like
112033021	LOC112033021	zinc finger protein ZAT11-like
112035993	LOC112035993	transcription factor MYB108
112015616	LOC112015616	AP2/ERF and B3 domain-containing transcription factor RAV1-like
112022460	LOC112022460	transcription factor WER
112004358	LOC112004358	ethylene-responsive transcription factor 12
112027112	LOC112027112	auxin-induced protein IAA6
112012378	LOC112012378	auxin-responsive protein IAA11
112008283	LOC112008283	transcription factor BEE 1-like
112012600	LOC112012600	auxin-responsive protein IAA29-like
112018242	LOC112018242	AP2-like ethylene-responsive transcription factor AIL6
111983239	LOC111983239	dof zinc finger protein DOF2.5-like
112027536	LOC112027536	ethylene-responsive transcription factor ERF110-like
112008894	LOC112008894	AT-hook motif nuclear-localized protein 22-like
112011953	LOC112011953	auxin response factor 5
112022199	LOC112022199	NAC domain-containing protein 72
112023684	LOC112023684	protein SHOOT GRAVITROPISM 5-like
111985380	LOC111985380	bZIP transcription factor 11-like
112000770	LOC112000770	LOB domain-containing protein 25-like
112026683	LOC112026683	LOB domain-containing protein 12-like
111986606	LOC111986606	auxin-responsive protein IAA29
111998864	LOC111998864	LOB domain-containing protein 29-like
112009383	LOC112009383	myb-related protein 308-like
112022281	LOC112022281	homeobox-leucine zipper protein HOX3-like
112031644	LOC112031644	LIM domain-containing protein WLIM1-like
111997593	LOC111997593	auxin-responsive protein IAA9-like
112000518	LOC112000518	putative GATA transcription factor 22
112036206	LOC112036206	transcription factor TGAL1-like
111987116	LOC111987116	cell division cycle-associated protein 7-like
